# Supplementary material for: Diversity of Neurotransmitter Producing Human Skin Commensals
Source: Preprints.org preprint supplement (doi:10.20944/preprints202410.1777.v1), 2024-10-24
Supplement: Supplementary file 1 [file supplementary]

## Sheet: SadA homologues
Table S4. List of Staphylococcus strains with SadA homologues. *17 strains have two homologues and are shown in bold type.
Protein	Name	Organism	Strain	Assembly
HAR7031158.1	aspartate aminotransferase family protein	Staphylococcus aureus	65	GCA_015603965.1
XCB41506.1	aspartate aminotransferase family protein	Staphylococcus aureus	102	GCA_040361455.1
XCB44171.1	aspartate aminotransferase family protein	Staphylococcus aureus	136	GCA_040361795.1
WP_032605060.1	aspartate aminotransferase family protein	Staphylococcus aureus	434.07	GCF_001226465.1
NKO27919.1	aminotransferase class V-fold PLP-dependent enzyme	Staphylococcus aureus	522	GCA_012277705.1
WP_032605060.1	aspartate aminotransferase family protein	Staphylococcus aureus	921.07	GCF_001236285.1
WP_032605060.1	aspartate aminotransferase family protein	Staphylococcus aureus	1018.07	GCF_001227685.1
XCB70594.1	aspartate aminotransferase family protein	Staphylococcus aureus	1221	GCA_040365755.1
HDK3141171.1	aspartate aminotransferase family protein	Staphylococcus aureus	2920	GCA_028510895.1
NKP11436.1	aminotransferase class V-fold PLP-dependent enzyme	Staphylococcus aureus	3046	GCF_012278485.1
HDT6701530.1	aspartate aminotransferase family protein	Staphylococcus aureus	5015	GCA_030898675.1
MWV09718.1	aminotransferase class V-fold PLP-dependent enzyme	Staphylococcus aureus	6092	GCF_009799645.1
MWV07304.1	aminotransferase class V-fold PLP-dependent enzyme	Staphylococcus aureus	6530	GCF_009799695.1
MDT3080909.1	aspartate aminotransferase family protein	Staphylococcus aureus	11871	GCA_031933745.1
MDT3051651.1	aspartate aminotransferase family protein	Staphylococcus aureus	45477	GCA_031933565.1
MDT3022437.1	aspartate aminotransferase family protein	Staphylococcus aureus	45481	GCA_031933285.1
HDG9863864.1	aspartate aminotransferase family protein	Staphylococcus aureus	70016	GCA_027915955.1
HDG7323467.1	aspartate aminotransferase family protein	Staphylococcus aureus	70070	GCA_027852915.1
HDC9683258.1	aspartate aminotransferase family protein	Staphylococcus aureus	20120443	GCA_027465025.1
HDC7477409.1	aspartate aminotransferase family protein	Staphylococcus aureus	20121036	GCA_027302345.1
HDC7870002.1	aspartate aminotransferase family protein	Staphylococcus aureus	20121672	GCA_027305265.1
HDC8999333.1	aspartate aminotransferase family protein	Staphylococcus aureus	20121717	GCA_027362035.1
HDC7459328.1	aspartate aminotransferase family protein	Staphylococcus aureus	20121743	GCA_027302185.1
HDC7805688.1	aspartate aminotransferase family protein	Staphylococcus aureus	20121745	GCA_027304725.1
HDC8980227.1	aspartate aminotransferase family protein	Staphylococcus aureus	20121748	GCA_027362255.1
HDC8861017.1	aspartate aminotransferase family protein	Staphylococcus aureus	20121749	GCA_027361175.1
WP_032605060.1	aspartate aminotransferase family protein	Staphylococcus aureus	06-01203	GCF_001233945.1
WP_032605060.1	aspartate aminotransferase family protein	Staphylococcus aureus	06-01686	GCF_001230825.1
HCZ1308181.1	aspartate aminotransferase family protein	Staphylococcus aureus	09B09	GCA_026864855.1
HCZ1750875.1	aspartate aminotransferase family protein	Staphylococcus aureus	09B14	GCA_026869715.1
NKO18069.1	aminotransferase class V-fold PLP-dependent enzyme	Staphylococcus aureus	112-1	GCA_012278505.1
MRM18950.1	aminotransferase class V-fold PLP-dependent enzyme	Staphylococcus aureus	12SJ161	GCF_009660925.1
MCT6580388.1	aspartate aminotransferase family protein	Staphylococcus aureus	17LX_2_54	GCA_025245345.1
XAF62010.1	aspartate aminotransferase family protein	Staphylococcus aureus	18-02202-1	GCA_038788575.1
WZP88170.1	aspartate aminotransferase family protein	Staphylococcus aureus	2010C08-173	GCA_038429865.1
HDR3263861.1	aspartate aminotransferase family protein	Staphylococcus aureus	21S365_1	GCA_029690745.1
HDR3162551.1	aspartate aminotransferase family protein	Staphylococcus aureus	21S433_1	GCA_029689805.1
HDR3195238.1	aspartate aminotransferase family protein	Staphylococcus aureus	21S478_1	GCA_029690405.1
HDS3751527.1	aspartate aminotransferase family protein	Staphylococcus aureus	21S488_1	GCA_030221405.1
HDR3214704.1	aspartate aminotransferase family protein	Staphylococcus aureus	21S495_1	GCA_029690505.1
HDS3759470.1	aspartate aminotransferase family protein	Staphylococcus aureus	21S534_1	GCA_030221465.1
HDR3285672.1	aspartate aminotransferase family protein	Staphylococcus aureus	21S572_1	GCA_029691505.1
NKP01244.1	aminotransferase class V-fold PLP-dependent enzyme	Staphylococcus aureus	2223-0	GCA_012278455.1
NKP19030.1	aminotransferase class V-fold PLP-dependent enzyme	Staphylococcus aureus	2223-1	GCA_012278385.1
NKO42728.1	aminotransferase class V-fold PLP-dependent enzyme	Staphylococcus aureus	2223-2	GCA_012278345.1
NKP70661.1	aminotransferase class V-fold PLP-dependent enzyme	Staphylococcus aureus	2778-1	GCF_012278275.1
NKP57992.1	aminotransferase class V-fold PLP-dependent enzyme	Staphylococcus aureus	2780-0	GCF_012278225.1
NKP68421.1	aminotransferase class V-fold PLP-dependent enzyme	Staphylococcus aureus	2780-1	GCF_012278795.1
NKP47538.1	aminotransferase class V-fold PLP-dependent enzyme	Staphylococcus aureus	2780-2	GCF_012278175.1
NKP63198.1	aminotransferase class V-fold PLP-dependent enzyme	Staphylococcus aureus	3046A1	GCF_012278855.1
NKP76111.1	aminotransferase class V-fold PLP-dependent enzyme	Staphylococcus aureus	3046B3	GCF_012278165.1
WP_032605060.1	aspartate aminotransferase family protein	Staphylococcus aureus	516_S40	GCF_023198785.1
HCZ3218840.1	aspartate aminotransferase family protein	Staphylococcus aureus	A65	GCA_026886425.1
HCZ3203707.1	aspartate aminotransferase family protein	Staphylococcus aureus	A79	GCA_026886345.1
WP_032605060.1	aspartate aminotransferase family protein	Staphylococcus aureus	ABR112	GCF_009764875.1
WP_032605060.1	aspartate aminotransferase family protein	Staphylococcus aureus	ABR121	GCF_009764845.1
WP_032605060.1	aspartate aminotransferase family protein	Staphylococcus aureus	ABR134	GCF_009764835.1
WP_032605060.1	aspartate aminotransferase family protein	Staphylococcus aureus	ABR171	GCF_009764825.1
WP_032605060.1	aspartate aminotransferase family protein	Staphylococcus aureus	ABR180	GCF_009764815.1
WP_032605060.1	aspartate aminotransferase family protein	Staphylococcus aureus	ABR26	GCF_009764915.1
WP_032605060.1	aspartate aminotransferase family protein	Staphylococcus aureus	ACR49	GCF_009764785.1
MBU8241287.1	aspartate aminotransferase family protein	Staphylococcus aureus	AF2056	GCA_019018365.1
MBU8252883.1	aspartate aminotransferase family protein	Staphylococcus aureus	AF2057	GCA_019018325.1
MBU8249489.1	aspartate aminotransferase family protein	Staphylococcus aureus	AF2058	GCA_019018135.1
MBU8247342.1	aspartate aminotransferase family protein	Staphylococcus aureus	AF2060	GCA_019018225.1
MBU8230949.1	aspartate aminotransferase family protein	Staphylococcus aureus	AF2061	GCA_019018245.1
MBU8239149.1	aspartate aminotransferase family protein	Staphylococcus aureus	AF2062	GCA_019017805.1
MBU8232946.1	aspartate aminotransferase family protein	Staphylococcus aureus	AF2063	GCA_019017745.1
WP_032605060.1	aspartate aminotransferase family protein	Staphylococcus aureus	AR49-1	GCF_003310325.1
HAR6809113.1	aspartate aminotransferase family protein	Staphylococcus aureus	AUSMDU00008390	GCA_015600185.1
HAR6842097.1	aspartate aminotransferase family protein	Staphylococcus aureus	AUSMDU00008454	GCA_015600325.1
HAR6759528.1	aspartate aminotransferase family protein	Staphylococcus aureus	AUSMDU00008485	GCA_015599785.1
HAZ6024659.1	aspartate aminotransferase family protein	Staphylococcus aureus	AUSMDU00010764	GCA_017669255.1
HAZ5044264.1	aspartate aminotransferase family protein	Staphylococcus aureus	AUSMDU00013836	GCA_017661935.1
HBE8276072.1	aspartate aminotransferase family protein	Staphylococcus aureus	AUSMDU00015250	GCA_018605875.1
HBE6989051.1	aspartate aminotransferase family protein	Staphylococcus aureus	AUSMDU00015457	GCA_018585045.1
HAZ6186354.1	aspartate aminotransferase family protein	Staphylococcus aureus	AUSMDU00016888	GCA_017670565.1
HBE8242834.1	aspartate aminotransferase family protein	Staphylococcus aureus	AUSMDU00018289	GCA_018605745.1
HBE6991923.1	aspartate aminotransferase family protein	Staphylococcus aureus	AUSMDU00019272	GCA_018584985.1
HAY1697957.1	aspartate aminotransferase family protein	Staphylococcus aureus	AUSMDU00019284	GCA_017091805.1
HBE8283863.1	aspartate aminotransferase family protein	Staphylococcus aureus	AUSMDU00020955	GCA_018605845.1
HAY1843998.1	aspartate aminotransferase family protein	Staphylococcus aureus	AUSMDU00024910	GCA_017092625.1
HBI1496399.1	aspartate aminotransferase family protein	Staphylococcus aureus	BCW_5395	GCA_015619315.2
HBI1538073.1	aspartate aminotransferase family protein	Staphylococcus aureus	BCW_5397	GCA_015619345.2
HBI9343274.1	aspartate aminotransferase family protein	Staphylococcus aureus	BCW_5404	GCA_015618985.2
HBI1487990.1	aspartate aminotransferase family protein	Staphylococcus aureus	BCW_5405	GCA_015619145.2
HBI1437733.1	aspartate aminotransferase family protein	Staphylococcus aureus	BCW_5423	GCA_015618885.2
HBI1432053.1	aspartate aminotransferase family protein	Staphylococcus aureus	BCW_5431	GCA_015619585.2
HBI1462827.1	aspartate aminotransferase family protein	Staphylococcus aureus	BCW_5464	GCA_015617445.2
HBI1228936.1	aspartate aminotransferase family protein	Staphylococcus aureus	BCW_5522	GCA_015616965.2
HBI9240487.1	aspartate aminotransferase family protein	Staphylococcus aureus	BCW_5574	GCA_015614845.2
HBI1032168.1	aspartate aminotransferase family protein	Staphylococcus aureus	BCW_5608	GCA_015615645.2
HBI1104198.1	aspartate aminotransferase family protein	Staphylococcus aureus	BCW_5642	GCA_015615965.2
HBI0973237.1	aspartate aminotransferase family protein	Staphylococcus aureus	BCW_5659	GCA_015614185.2
WP_032605060.1	aspartate aminotransferase family protein	Staphylococcus aureus	BSAC2396	GCF_900045165.1
WP_032605060.1	aspartate aminotransferase family protein	Staphylococcus aureus	BSAC3047	GCF_900057345.1
WP_032605060.1	aspartate aminotransferase family protein	Staphylococcus aureus	BSAC427	GCF_900037695.1
WP_032605060.1	aspartate aminotransferase family protein	Staphylococcus aureus	BSAC430	GCF_900045775.1
WP_032605060.1	aspartate aminotransferase family protein	Staphylococcus aureus	BSAC830_rpt	GCF_900033755.1
WP_032605060.1	aspartate aminotransferase family protein	Staphylococcus aureus	BSAC970	GCF_900041995.1
RYV22275.1	aminotransferase class V-fold PLP-dependent enzyme	Staphylococcus aureus	C	GCF_004168735.1
HCZ1457985.1	aspartate aminotransferase family protein	Staphylococcus aureus	C12	GCA_026865875.1
KQB71826.1	pyridoxal-dependent decarboxylase	Staphylococcus aureus	CC175	GCA_001411695.1
PZK41114.1	aminotransferase class V-fold PLP-dependent enzyme	Staphylococcus aureus	CM84	GCF_003239505.1
HCZ1375298.1	aspartate aminotransferase family protein	Staphylococcus aureus	CY076	GCA_026865375.1
MBY0949939.1	aspartate aminotransferase family protein	Staphylococcus aureus	D2173	GCA_019758575.1
MUG76642.1	aminotransferase class V-fold PLP-dependent enzyme	Staphylococcus aureus	EE08	GCF_009725305.1
MUH30193.1	aminotransferase class V-fold PLP-dependent enzyme	Staphylococcus aureus	EL03	GCF_009725495.1
MUG15115.1	aminotransferase class V-fold PLP-dependent enzyme	Staphylococcus aureus	EL27	GCF_009725355.1
MUH15018.1	aminotransferase class V-fold PLP-dependent enzyme	Staphylococcus aureus	EL28	GCF_009725905.1
SVG18909.1	pyridoxal-deC	Staphylococcus aureus	EOE232	GCF_900483685.1
MUG39542.1	aminotransferase class V-fold PLP-dependent enzyme	Staphylococcus aureus	ES23	GCF_009725325.1
ARH68201.1	pyridoxal-dependent decarboxylase	Staphylococcus aureus	GD5	GCA_002089055.1
MEW7656928.1	aspartate aminotransferase family protein	Staphylococcus aureus	Gr_60_1	GCA_040788675.1
HDC2770958.1	aspartate aminotransferase family protein	Staphylococcus aureus	H124920172	GCA_027243165.1
WP_032605060.1	aspartate aminotransferase family protein	Staphylococcus aureus	H1577	GCF_900250555.1
WP_049386152.1	aspartate aminotransferase family protein	Staphylococcus aureus	H1670	GCF_001971525.1
WP_049386152.1	aspartate aminotransferase family protein	Staphylococcus aureus	H1730	GCF_900250675.1
WP_032605060.1	aspartate aminotransferase family protein	Staphylococcus aureus	H1843	GCF_900250805.1
WP_032605060.1	aspartate aminotransferase family protein	Staphylococcus aureus	H914 91	GCF_001230225.1
WP_032605060.1	aspartate aminotransferase family protein	Staphylococcus aureus	HB1	GCF_030403975.1
HEN4245975.1	aspartate aminotransferase family protein	Staphylococcus aureus	HC0304183	GCA_034411575.1
HEN4152708.1	aspartate aminotransferase family protein	Staphylococcus aureus	HC0304801	GCA_034410405.1
RYV19963.1	aminotransferase class V-fold PLP-dependent enzyme	Staphylococcus aureus	HCW	GCA_004168825.1
WP_032605060.1	aspartate aminotransferase family protein	Staphylococcus aureus	HL20709	GCF_013003945.1
QYY46199.1	aspartate aminotransferase family protein	Staphylococcus aureus	HL23187	GCA_019603375.1
WP_032605060.1	aspartate aminotransferase family protein	Staphylococcus aureus	HL456	GCF_900250875.1
HDJ1359039.1	aspartate aminotransferase family protein	Staphylococcus aureus	HU13-0121008	GCA_028260625.1
HDJ1235264.1	aspartate aminotransferase family protein	Staphylococcus aureus	HU13-0305001	GCA_028257105.1
HDJ1324612.1	aspartate aminotransferase family protein	Staphylococcus aureus	HU13-0423007	GCA_028257505.1
HDJ1364593.1	aspartate aminotransferase family protein	Staphylococcus aureus	HU13-0507037	GCA_028260845.1
HDJ1310904.1	aspartate aminotransferase family protein	Staphylococcus aureus	HU13-0722077	GCA_028257745.1
HCQ2054302.1	aspartate aminotransferase family protein	Staphylococcus aureus	HU25	GCA_025695105.1
ATH56183.1	pyridoxal-dependent decarboxylase	Staphylococcus aureus	HZW450	GCA_002442975.1
CAC5896060.1	pyridoxal-deC	Staphylococcus aureus	IC41	GCA_903800045.1
WP_032605060.1	aspartate aminotransferase family protein	Staphylococcus aureus	JARB-OU1128	GCF_023706085.1
WP_032605060.1	aspartate aminotransferase family protein	Staphylococcus aureus	JARB-OU1129	GCF_023706105.1
WP_032605060.1	aspartate aminotransferase family protein	Staphylococcus aureus	JARB-OU1210	GCF_023706645.1
WP_032605060.1	aspartate aminotransferase family protein	Staphylococcus aureus	JARB-OU1219	GCF_023706785.1
WP_032605060.1	aspartate aminotransferase family protein	Staphylococcus aureus	JARB-OU1237	GCF_023707145.1
WP_032605060.1	aspartate aminotransferase family protein	Staphylococcus aureus	JARB-OU1244	GCF_023707285.1
WP_032605060.1	aspartate aminotransferase family protein	Staphylococcus aureus	JARB-OU1254	GCF_023707485.1
HDJ2419590.1	aspartate aminotransferase family protein	Staphylococcus aureus	JARB-OU1324	GCA_028312045.1
BAH66836.1	hypothetical protein	Staphylococcus aureus	JCSC 5952
HDB3836802.1	aspartate aminotransferase family protein	Staphylococcus aureus	JH6009	GCA_027169925.1
HDB3428016.1	aspartate aminotransferase family protein	Staphylococcus aureus	JH6133	GCA_027166125.1
HDK4035191.1	aspartate aminotransferase family protein	Staphylococcus aureus	JMUB1283	GCA_028522605.1
HDK4018403.1	aspartate aminotransferase family protein	Staphylococcus aureus	JMUB1284	GCA_028522585.1
HDK4019363.1	aspartate aminotransferase family protein	Staphylococcus aureus	JMUB1285	GCA_028522565.1
HDK4005740.1	aspartate aminotransferase family protein	Staphylococcus aureus	JMUB1289	GCA_028522505.1
HDK3996701.1	aspartate aminotransferase family protein	Staphylococcus aureus	JMUB1301	GCA_028522325.1
HDK4038969.1	aspartate aminotransferase family protein	Staphylococcus aureus	JMUB1304	GCA_028522285.1
HDK3733085.1	aspartate aminotransferase family protein	Staphylococcus aureus	JMUB1972	GCA_028519905.1
HDK3802243.1	aspartate aminotransferase family protein	Staphylococcus aureus	JMUB1973	GCA_028520765.1
HDK3735941.1	aspartate aminotransferase family protein	Staphylococcus aureus	JMUB1974	GCA_028519925.1
HDK3738582.1	aspartate aminotransferase family protein	Staphylococcus aureus	JMUB1976	GCA_028519845.1
HDK4105812.1	aspartate aminotransferase family protein	Staphylococcus aureus	JMUB1977	GCA_028528225.1
HDK3979772.1	aspartate aminotransferase family protein	Staphylococcus aureus	JMUB1978	GCA_028522105.1
HDK3722341.1	aspartate aminotransferase family protein	Staphylococcus aureus	JMUB1980	GCA_028519885.1
HDK3799497.1	aspartate aminotransferase family protein	Staphylococcus aureus	JMUB1981	GCA_028520725.1
HDT5788228.1	aspartate aminotransferase family protein	Staphylococcus aureus	JMUB3024	GCA_030883625.1
MBY0915984.1	aspartate aminotransferase family protein	Staphylococcus aureus	KE6948	GCA_019757715.1
NKO58246.1	aminotransferase class V-fold PLP-dependent enzyme	Staphylococcus aureus	L16	GCF_012277835.1
HCZ1886036.1	aspartate aminotransferase family protein	Staphylococcus aureus	lc030	GCA_026870695.1
MUG52010.1	aminotransferase class V-fold PLP-dependent enzyme	Staphylococcus aureus	LJ05	GCF_009725565.1
MUG19857.1	aminotransferase class V-fold PLP-dependent enzyme	Staphylococcus aureus	LJ09	GCF_009725405.1
MUG50074.1	aminotransferase class V-fold PLP-dependent enzyme	Staphylococcus aureus	LJ20	GCF_009725415.1
MUG38020.1	aminotransferase class V-fold PLP-dependent enzyme	Staphylococcus aureus	LJ27	GCF_009725385.1
MUH20443.1	aminotransferase class V-fold PLP-dependent enzyme	Staphylococcus aureus	LJ40	GCF_009725915.1
MUH08930.1	aminotransferase class V-fold PLP-dependent enzyme	Staphylococcus aureus	LQ21	GCF_009725435.1
MUH11720.1	aminotransferase class V-fold PLP-dependent enzyme	Staphylococcus aureus	LS05	GCF_009725665.1
MUG63691.1	aminotransferase class V-fold PLP-dependent enzyme	Staphylococcus aureus	LS35	GCF_009725465.1
HDH6209171.1	aspartate aminotransferase family protein	Staphylococcus aureus	LTCF-14-59	GCA_028005405.1
MUH25989.1	aminotransferase class V-fold PLP-dependent enzyme	Staphylococcus aureus	LW34	GCF_009725625.1
MBW0249479.1	aspartate aminotransferase family protein	Staphylococcus aureus	M32	GCA_019265645.1
WP_049386152.1	aspartate aminotransferase family protein	Staphylococcus aureus	M3330	GCF_900251295.1
WP_032605060.1	aspartate aminotransferase family protein	Staphylococcus aureus	M3593	GCF_900251615.1
WP_032605060.1	aspartate aminotransferase family protein	Staphylococcus aureus	M3688	GCF_900251625.1
WP_032605060.1	aspartate aminotransferase family protein	Staphylococcus aureus	M3935	GCF_900251925.1
WP_032605060.1	aspartate aminotransferase family protein	Staphylococcus aureus	M4001	GCF_900252045.1
MBW0267567.1	aspartate aminotransferase family protein	Staphylococcus aureus	M44	GCA_019265525.1
GCA44386.1	L-2,4-diaminobutyrate decarboxylase	Staphylococcus aureus	M6K232	GCF_003423625.1
HCE4418698.1	aspartate aminotransferase family protein	Staphylococcus aureus	Microbial blood	GCA_023829855.1
HCE4424311.1	aspartate aminotransferase family protein	Staphylococcus aureus	Microbial sputum	GCA_023829975.1
HCE4424517.1	aspartate aminotransferase family protein	Staphylococcus aureus	Microbial sputum	GCA_023829975.1
CAC8035113.1	pyridoxal-deC	Staphylococcus aureus	MOS41	GCA_903808295.1
HDD7952228.1	aspartate aminotransferase family protein	Staphylococcus aureus	MPROS0008	GCA_027547765.1
HDD6510658.1	aspartate aminotransferase family protein	Staphylococcus aureus	MPROS0041	GCA_027536945.1
HDD7853975.1	aspartate aminotransferase family protein	Staphylococcus aureus	MPROS0044	GCA_027547225.1
HDD6527532.1	aspartate aminotransferase family protein	Staphylococcus aureus	MPROS0101	GCA_027537365.1
HCQ2231804.1	aspartate aminotransferase family protein	Staphylococcus aureus	MPROS0110	GCA_025697525.1
HCQ2183144.1	aspartate aminotransferase family protein	Staphylococcus aureus	MPROS0121	GCA_025701595.1
HCQ2166880.1	aspartate aminotransferase family protein	Staphylococcus aureus	MPROS0136	GCA_025695545.1
HCQ2000734.1	aspartate aminotransferase family protein	Staphylococcus aureus	MPROS0137	GCA_025689865.1
HCQ2162339.1	aspartate aminotransferase family protein	Staphylococcus aureus	MPROS0156	GCA_025726065.1
HCQ1970945.1	aspartate aminotransferase family protein	Staphylococcus aureus	MPROS0169	GCA_025689785.1
HCQ2112230.1	aspartate aminotransferase family protein	Staphylococcus aureus	MPROS0170	GCA_025701485.1
HDD8180783.1	aspartate aminotransferase family protein	Staphylococcus aureus	MPROS0203	GCA_027549405.1
HDD7995633.1	aspartate aminotransferase family protein	Staphylococcus aureus	MPROS0273	GCA_027548105.1
HDD6435363.1	aspartate aminotransferase family protein	Staphylococcus aureus	MPROS0315	GCA_027536525.1
HDD6386620.1	aspartate aminotransferase family protein	Staphylococcus aureus	MPROS0326	GCA_027536305.1
HDD6381543.1	aspartate aminotransferase family protein	Staphylococcus aureus	MPROS0328	GCA_027536185.1
HDD6242788.1	aspartate aminotransferase family protein	Staphylococcus aureus	MPROS0372	GCA_027535325.1
HDD6062778.1	aspartate aminotransferase family protein	Staphylococcus aureus	MPROS0421	GCA_027533965.1
HDD6010741.1	aspartate aminotransferase family protein	Staphylococcus aureus	MPROS0436	GCA_027532835.1
HDD3213328.1	aspartate aminotransferase family protein	Staphylococcus aureus	MPROS0480	GCA_027510565.1
HDD5453131.1	aspartate aminotransferase family protein	Staphylococcus aureus	MPROS0536	GCA_027526665.1
HDD3083739.1	aspartate aminotransferase family protein	Staphylococcus aureus	MPROS1141	GCA_027509605.1
HDD5662357.1	aspartate aminotransferase family protein	Staphylococcus aureus	MPROS1182	GCA_027528185.1
HDD5656098.1	aspartate aminotransferase family protein	Staphylococcus aureus	MPROS1183	GCA_027528125.1
HDD5646067.1	aspartate aminotransferase family protein	Staphylococcus aureus	MPROS1187	GCA_027528055.1
HDD5612353.1	aspartate aminotransferase family protein	Staphylococcus aureus	MPROS1200	GCA_027527845.1
HDD5516803.1	aspartate aminotransferase family protein	Staphylococcus aureus	MPROS1262	GCA_027527265.1
HDD4190048.1	aspartate aminotransferase family protein	Staphylococcus aureus	MPROS1267	GCA_027517625.1
HDD4143113.1	aspartate aminotransferase family protein	Staphylococcus aureus	MPROS1289	GCA_027517285.1
HDD3806225.1	aspartate aminotransferase family protein	Staphylococcus aureus	MPROS1323	GCA_027514705.1
HDD3751989.1	aspartate aminotransferase family protein	Staphylococcus aureus	MPROS1381	GCA_027514435.1
HDD3735495.1	aspartate aminotransferase family protein	Staphylococcus aureus	MPROS1407	GCA_027514305.1
HDD3893042.1	aspartate aminotransferase family protein	Staphylococcus aureus	MPROS1423	GCA_027515445.1
HDD3677120.1	aspartate aminotransferase family protein	Staphylococcus aureus	MPROS1486	GCA_027513865.1
HDD3658324.1	aspartate aminotransferase family protein	Staphylococcus aureus	MPROS1493	GCA_027513725.1
HDD3464145.1	aspartate aminotransferase family protein	Staphylococcus aureus	MPROS1581	GCA_027512325.1
HDD3432343.1	aspartate aminotransferase family protein	Staphylococcus aureus	MPROS1596	GCA_027512065.1
HDD3372519.1	aspartate aminotransferase family protein	Staphylococcus aureus	MPROS1630	GCA_027511685.1
HDD2981280.1	aspartate aminotransferase family protein	Staphylococcus aureus	MPROS1679	GCA_027509005.1
HDD2935576.1	aspartate aminotransferase family protein	Staphylococcus aureus	MPROS1704	GCA_027508425.1
HDD2907089.1	aspartate aminotransferase family protein	Staphylococcus aureus	MPROS1708	GCA_027508455.1
HDD2901921.1	aspartate aminotransferase family protein	Staphylococcus aureus	MPROS1714	GCA_027508305.1
HDD5396075.1	aspartate aminotransferase family protein	Staphylococcus aureus	MPROS1787	GCA_027526285.1
HDD5396728.1	aspartate aminotransferase family protein	Staphylococcus aureus	MPROS1787	GCA_027526285.1
HDD5090801.1	aspartate aminotransferase family protein	Staphylococcus aureus	MPROS1852	GCA_027524085.1
HDD5777508.1	aspartate aminotransferase family protein	Staphylococcus aureus	MPROS1859	GCA_027529065.1
HDD2292481.1	aspartate aminotransferase family protein	Staphylococcus aureus	MPROS1900	GCA_027503785.1
HDD2561443.1	aspartate aminotransferase family protein	Staphylococcus aureus	MPROS1905	GCA_027505805.1
HDD2562006.1	aspartate aminotransferase family protein	Staphylococcus aureus	MPROS1905	GCA_027505805.1
HDD4972004.1	aspartate aminotransferase family protein	Staphylococcus aureus	MPROS1944	GCA_027523245.1
HDD2581988.1	aspartate aminotransferase family protein	Staphylococcus aureus	MPROS1952	GCA_027505925.1
HDD2343011.1	aspartate aminotransferase family protein	Staphylococcus aureus	MPROS1987	GCA_027504245.1
HDD2320523.1	aspartate aminotransferase family protein	Staphylococcus aureus	MPROS1988	GCA_027504045.1
HDD2394950.1	aspartate aminotransferase family protein	Staphylococcus aureus	MPROS2011	GCA_027504585.1
HDD2359943.1	aspartate aminotransferase family protein	Staphylococcus aureus	MPROS2029	GCA_027504365.1
HDD2360603.1	aspartate aminotransferase family protein	Staphylococcus aureus	MPROS2029	GCA_027504365.1
HDD5734541.1	aspartate aminotransferase family protein	Staphylococcus aureus	MPROS2036	GCA_027528785.1
HDD5735200.1	aspartate aminotransferase family protein	Staphylococcus aureus	MPROS2036	GCA_027528785.1
HDD5817901.1	aspartate aminotransferase family protein	Staphylococcus aureus	MPROS2045	GCA_027529325.1
HDD5759898.1	aspartate aminotransferase family protein	Staphylococcus aureus	MPROS2051	GCA_027528905.1
HDD5760468.1	aspartate aminotransferase family protein	Staphylococcus aureus	MPROS2051	GCA_027528905.1
HDD5769628.1	aspartate aminotransferase family protein	Staphylococcus aureus	MPROS2055	GCA_027528925.1
HDD5019002.1	aspartate aminotransferase family protein	Staphylococcus aureus	MPROS2090	GCA_027523465.1
HDD2419386.1	aspartate aminotransferase family protein	Staphylococcus aureus	MPROS2110	GCA_027504805.1
HDD5736784.1	aspartate aminotransferase family protein	Staphylococcus aureus	MPROS2121	GCA_027528745.1
HDD4885032.1	aspartate aminotransferase family protein	Staphylococcus aureus	MPROS2135	GCA_027522545.1
HDD5903257.1	aspartate aminotransferase family protein	Staphylococcus aureus	MPROS2145	GCA_027530125.1
HDD5883237.1	aspartate aminotransferase family protein	Staphylococcus aureus	MPROS2146	GCA_027530065.1
HDD4897314.1	aspartate aminotransferase family protein	Staphylococcus aureus	MPROS2152	GCA_027522665.1
HDD4897996.1	aspartate aminotransferase family protein	Staphylococcus aureus	MPROS2152	GCA_027522665.1
HDD4894537.1	aspartate aminotransferase family protein	Staphylococcus aureus	MPROS2246	GCA_027522685.1
HDD4895205.1	aspartate aminotransferase family protein	Staphylococcus aureus	MPROS2246	GCA_027522685.1
HDD2602175.1	aspartate aminotransferase family protein	Staphylococcus aureus	MPROS2275	GCA_027506105.1
HDD5027441.1	aspartate aminotransferase family protein	Staphylococcus aureus	MPROS2278	GCA_027523625.1
HDD4582390.1	aspartate aminotransferase family protein	Staphylococcus aureus	MPROS2288	GCA_027520405.1
HDD4501491.1	aspartate aminotransferase family protein	Staphylococcus aureus	MPROS2320	GCA_027519885.1
HDD4441029.1	aspartate aminotransferase family protein	Staphylococcus aureus	MPROS2361	GCA_027519445.1
HDD4311033.1	aspartate aminotransferase family protein	Staphylococcus aureus	MPROS2374	GCA_027518465.1
HDD4731191.1	aspartate aminotransferase family protein	Staphylococcus aureus	MPROS2449	GCA_027521405.1
HDD4731799.1	aspartate aminotransferase family protein	Staphylococcus aureus	MPROS2449	GCA_027521405.1
HDD4696404.1	aspartate aminotransferase family protein	Staphylococcus aureus	MPROS2463	GCA_027521265.1
HDD4601731.1	aspartate aminotransferase family protein	Staphylococcus aureus	MPROS2495	GCA_027520685.1
WP_032605060.1	aspartate aminotransferase family protein	Staphylococcus aureus	MR121	GCF_029853625.1
WP_032605060.1	aspartate aminotransferase family protein	Staphylococcus aureus	MR156	GCF_029853575.1
WP_032605060.1	aspartate aminotransferase family protein	Staphylococcus aureus	MR168	GCF_029853535.1
WP_032605060.1	aspartate aminotransferase family protein	Staphylococcus aureus	MR213	GCF_029853515.1
MET1302392.1	aspartate aminotransferase family protein	Staphylococcus aureus	MR266	GCA_040529645.1
WP_032605060.1	aspartate aminotransferase family protein	Staphylococcus aureus	MR280	GCF_029853495.1
WP_032605060.1	aspartate aminotransferase family protein	Staphylococcus aureus	MR287	GCF_029853455.1
WP_032605060.1	aspartate aminotransferase family protein	Staphylococcus aureus	MR350	GCF_029853465.1
MBY0867980.1	aspartate aminotransferase family protein	Staphylococcus aureus	MR432	GCA_019756975.1
WP_032605060.1	aspartate aminotransferase family protein	Staphylococcus aureus	MR524	GCF_029853115.1
WP_032605060.1	aspartate aminotransferase family protein	Staphylococcus aureus	MRSA ermB SO574	GCF_024734465.1
WP_032605060.1	aspartate aminotransferase family protein	Staphylococcus aureus	MRSA_30	GCF_037169565.1
WP_032605060.1	aspartate aminotransferase family protein	Staphylococcus aureus	MRSA_36	GCF_037169425.1
MBN5691340.1	aspartate aminotransferase family protein	Staphylococcus aureus	MRSA10597	GCA_017154615.1
HEJ9184273.1	aspartate aminotransferase family protein	Staphylococcus aureus	MRSA11301	GCA_033919305.1
HEJ9234471.1	aspartate aminotransferase family protein	Staphylococcus aureus	MRSA11318	GCA_033919665.1
HEJ6646298.1	aspartate aminotransferase family protein	Staphylococcus aureus	MRSA11438	GCA_033904485.1
HEJ7582358.1	aspartate aminotransferase family protein	Staphylococcus aureus	MRSA11506	GCA_033909665.1
HEJ8685528.1	aspartate aminotransferase family protein	Staphylococcus aureus	MRSA11560	GCA_033916365.1
HEJ8925983.1	aspartate aminotransferase family protein	Staphylococcus aureus	MRSA11748	GCA_033917905.1
HEJ8972384.1	aspartate aminotransferase family protein	Staphylococcus aureus	MRSA11794	GCA_033918145.1
HEJ6835069.1	aspartate aminotransferase family protein	Staphylococcus aureus	MRSA11815	GCA_033905785.1
ALR00838.1	pyridoxal-dependent decarboxylase	Staphylococcus aureus	MS4	GCA_001456215.1
OSC82690.1	pyridoxal-dependent decarboxylase	Staphylococcus aureus	MS4_LZD100	GCA_002105325.1
PNS34982.1	pyridoxal-dependent decarboxylase	Staphylococcus aureus	MS4L120	GCA_002896465.1
WP_032605060.1	aspartate aminotransferase family protein	Staphylococcus aureus	MS4o8	GCF_003992475.1
WP_032605060.1	aspartate aminotransferase family protein	Staphylococcus aureus	MS4-T10	GCF_001611485.1
WP_032605060.1	aspartate aminotransferase family protein	Staphylococcus aureus	MS4-T60	GCF_001611535.1
SBB23217.1	pyridoxal-deC	Staphylococcus aureus	MSSA	GCF_900081405.1
MBZ6497952.1	aspartate aminotransferase family protein	Staphylococcus aureus	NAS_NP_123	GCA_020108815.1
RYV45280.1	aminotransferase class V-fold PLP-dependent enzyme	Staphylococcus aureus	P1 right hand palm swab	GCF_004168915.1
RYV36040.1	aminotransferase class V-fold PLP-dependent enzyme	Staphylococcus aureus	P10 nasal swab	GCF_004168705.1
RYV21358.1	aminotransferase class V-fold PLP-dependent enzyme	Staphylococcus aureus	P11 nasal swab	GCF_004168725.1
RYV36816.1	aminotransferase class V-fold PLP-dependent enzyme	Staphylococcus aureus	P12 nasal swab	GCF_004168835.1
RYB12978.1	aminotransferase class V-fold PLP-dependent enzyme	Staphylococcus aureus	P13 nasal swab	GCF_004136935.1
RYV11212.1	aminotransferase class V-fold PLP-dependent enzyme	Staphylococcus aureus	P14 nasal swab	GCF_004168635.1
RYV10415.1	aminotransferase class V-fold PLP-dependent enzyme	Staphylococcus aureus	P15 nasal swab	GCF_004168815.1
RYB29147.1	aminotransferase class V-fold PLP-dependent enzyme	Staphylococcus aureus	P2	GCF_031734575.1
RYC36842.1	aminotransferase class V-fold PLP-dependent enzyme	Staphylococcus aureus	P3 blood culture Hong Kong	GCF_004137725.1
RYV49272.1	aminotransferase class V-fold PLP-dependent enzyme	Staphylococcus aureus	P4	GCF_004168715.1
RYB24795.1	aminotransferase class V-fold PLP-dependent enzyme	Staphylococcus aureus	P5	GCF_004137025.1
RYV38481.1	aminotransferase class V-fold PLP-dependent enzyme	Staphylococcus aureus	P6	GCF_004168905.1
RYB22041.1	aminotransferase class V-fold PLP-dependent enzyme	Staphylococcus aureus	P7	GCF_004137105.1
RYB19318.1	aminotransferase class V-fold PLP-dependent enzyme	Staphylococcus aureus	P8 nasal swab	GCF_004137005.1
WP_032605060.1	aspartate aminotransferase family protein	Staphylococcus aureus	P8 secretions	GCF_026226395.1
RYB30230.1	aminotransferase class V-fold PLP-dependent enzyme	Staphylococcus aureus	P9	GCF_004137035.1
MCF8770793.1	aspartate aminotransferase family protein	Staphylococcus aureus	Patient 17, Isolate 04	GCA_021852505.1
QNW67863.1	aspartate aminotransferase family protein	Staphylococcus aureus	pt257	GCA_014726455.1
RDE32290.1	aminotransferase class V-fold PLP-dependent enzyme	Staphylococcus aureus	QY01	GCF_003345455.1
RDE35355.1	aminotransferase class V-fold PLP-dependent enzyme	Staphylococcus aureus	QY02	GCF_003345515.1
HDH9945072.1	aspartate aminotransferase family protein	Staphylococcus aureus	RIVM_M010738	GCA_028056095.1
HDH9953440.1	aspartate aminotransferase family protein	Staphylococcus aureus	RIVM_M012024	GCA_028056255.1
HDH9528176.1	aspartate aminotransferase family protein	Staphylococcus aureus	RIVM_M015790	GCA_028050985.1
HDH9577635.1	aspartate aminotransferase family protein	Staphylococcus aureus	RIVM_M016190	GCA_028051345.1
HDE9126874.1	aspartate aminotransferase family protein	Staphylococcus aureus	RIVM_M018715	GCA_027695605.1
HDE8294584.1	aspartate aminotransferase family protein	Staphylococcus aureus	RIVM_M019250	GCA_027874645.1
HDE9175992.1	aspartate aminotransferase family protein	Staphylococcus aureus	RIVM_M024219	GCA_027695785.1
HDE9214399.1	aspartate aminotransferase family protein	Staphylococcus aureus	RIVM_M025835	GCA_027696235.1
HDE8476425.1	aspartate aminotransferase family protein	Staphylococcus aureus	RIVM_M025896	GCA_027677465.1
HDE9225736.1	aspartate aminotransferase family protein	Staphylococcus aureus	RIVM_M026013	GCA_027696425.1
HDE9231571.1	aspartate aminotransferase family protein	Staphylococcus aureus	RIVM_M026270	GCA_027696585.1
HDE9323674.1	aspartate aminotransferase family protein	Staphylococcus aureus	RIVM_M031829	GCA_027698395.1
HDE9315691.1	aspartate aminotransferase family protein	Staphylococcus aureus	RIVM_M031830	GCA_027698645.1
HDE9340317.1	aspartate aminotransferase family protein	Staphylococcus aureus	RIVM_M031910	GCA_027698505.1
HDE8752356.1	aspartate aminotransferase family protein	Staphylococcus aureus	RIVM_M032515	GCA_027878505.1
HDE8415752.1	aspartate aminotransferase family protein	Staphylococcus aureus	RIVM_M032562	GCA_027875985.1
HDE8250538.1	aspartate aminotransferase family protein	Staphylococcus aureus	RIVM_M032589	GCA_027874385.1
HDE9741779.1	aspartate aminotransferase family protein	Staphylococcus aureus	RIVM_M032680	GCA_027701345.1
HDE8822017.1	aspartate aminotransferase family protein	Staphylococcus aureus	RIVM_M033116	GCA_027689005.1
HDE7931003.1	aspartate aminotransferase family protein	Staphylococcus aureus	RIVM_M033119	GCA_027873645.1
HDE8249762.1	aspartate aminotransferase family protein	Staphylococcus aureus	RIVM_M033120	GCA_027874445.1
HDE8083655.1	aspartate aminotransferase family protein	Staphylococcus aureus	RIVM_M033145	GCA_027667665.1
HDE9847961.1	aspartate aminotransferase family protein	Staphylococcus aureus	RIVM_M033524	GCA_027701865.1
HDE9875836.1	aspartate aminotransferase family protein	Staphylococcus aureus	RIVM_M033622	GCA_027702145.1
HDE9918753.1	aspartate aminotransferase family protein	Staphylococcus aureus	RIVM_M033655	GCA_027702165.1
HDE9905169.1	aspartate aminotransferase family protein	Staphylococcus aureus	RIVM_M033737	GCA_027702345.1
HDE9452818.1	aspartate aminotransferase family protein	Staphylococcus aureus	RIVM_M033788	GCA_027881065.1
HDE8867218.1	aspartate aminotransferase family protein	Staphylococcus aureus	RIVM_M036355	GCA_027879185.1
HDE8210696.1	aspartate aminotransferase family protein	Staphylococcus aureus	RIVM_M036501	GCA_027874345.1
HDE9562311.1	aspartate aminotransferase family protein	Staphylococcus aureus	RIVM_M036564	GCA_027700105.1
HDE9592121.1	aspartate aminotransferase family protein	Staphylococcus aureus	RIVM_M036643	GCA_027700405.1
HDE9597740.1	aspartate aminotransferase family protein	Staphylococcus aureus	RIVM_M036653	GCA_027700385.1
HDE9628225.1	aspartate aminotransferase family protein	Staphylococcus aureus	RIVM_M036688	GCA_027881105.1
HDE9964142.1	aspartate aminotransferase family protein	Staphylococcus aureus	RIVM_M036753	GCA_027702645.1
HDE6809351.1	aspartate aminotransferase family protein	Staphylococcus aureus	RIVM_M037182	GCA_027869685.1
HDF0910206.1	aspartate aminotransferase family protein	Staphylococcus aureus	RIVM_M037268	GCA_027713085.1
HDE8040347.1	aspartate aminotransferase family protein	Staphylococcus aureus	RIVM_M037367	GCA_027873825.1
HDE8041042.1	aspartate aminotransferase family protein	Staphylococcus aureus	RIVM_M037367	GCA_027873825.1
HDE7429230.1	aspartate aminotransferase family protein	Staphylococcus aureus	RIVM_M037500	GCA_027657005.1
HDE7448661.1	aspartate aminotransferase family protein	Staphylococcus aureus	RIVM_M037516	GCA_027657045.1
HDF0164833.1	aspartate aminotransferase family protein	Staphylococcus aureus	RIVM_M037731	GCA_027704085.1
HDF0234234.1	aspartate aminotransferase family protein	Staphylococcus aureus	RIVM_M037840	GCA_027704625.1
HDE7224993.1	aspartate aminotransferase family protein	Staphylococcus aureus	RIVM_M037935	GCA_027870905.1
HDE7538503.1	aspartate aminotransferase family protein	Staphylococcus aureus	RIVM_M038089	GCA_027657665.1
HDE8543299.1	aspartate aminotransferase family protein	Staphylococcus aureus	RIVM_M038334	GCA_027877265.1
HDE7591244.1	aspartate aminotransferase family protein	Staphylococcus aureus	RIVM_M038460	GCA_027871705.1
HDF0383861.1	aspartate aminotransferase family protein	Staphylococcus aureus	RIVM_M038679	GCA_027706705.1
HDF0398726.1	aspartate aminotransferase family protein	Staphylococcus aureus	RIVM_M038703	GCA_027706985.1
HDF0851625.1	aspartate aminotransferase family protein	Staphylococcus aureus	RIVM_M038950	GCA_027712245.1
HDF0882490.1	aspartate aminotransferase family protein	Staphylococcus aureus	RIVM_M038980	GCA_027712625.1
HDE7751487.1	aspartate aminotransferase family protein	Staphylococcus aureus	RIVM_M039081	GCA_027872405.1
HDE7906390.1	aspartate aminotransferase family protein	Staphylococcus aureus	RIVM_M039241	GCA_027873585.1
HDF0518413.1	aspartate aminotransferase family protein	Staphylococcus aureus	RIVM_M039424	GCA_027708365.1
HDF0942703.1	aspartate aminotransferase family protein	Staphylococcus aureus	RIVM_M039598	GCA_027713525.1
HDF0944421.1	aspartate aminotransferase family protein	Staphylococcus aureus	RIVM_M039598	GCA_027713525.1
HDF0991286.1	aspartate aminotransferase family protein	Staphylococcus aureus	RIVM_M039661	GCA_027714285.1
HDE7103814.1	aspartate aminotransferase family protein	Staphylococcus aureus	RIVM_M039717	GCA_027655785.1
HDE7123109.1	aspartate aminotransferase family protein	Staphylococcus aureus	RIVM_M039746	GCA_027870105.1
HDE8587960.1	aspartate aminotransferase family protein	Staphylococcus aureus	RIVM_M039849	GCA_027877585.1
HDF0664703.1	aspartate aminotransferase family protein	Staphylococcus aureus	RIVM_M039859	GCA_027709445.1
HDE9547725.1	aspartate aminotransferase family protein	Staphylococcus aureus	RIVM_M039890	GCA_027700045.1
HDG4143373.1	aspartate aminotransferase family protein	Staphylococcus aureus	RIVM_M040150	GCA_027821235.1
HDG3827264.1	aspartate aminotransferase family protein	Staphylococcus aureus	RIVM_M040247	GCA_027818915.1
HDG4338910.1	aspartate aminotransferase family protein	Staphylococcus aureus	RIVM_M040285	GCA_027822575.1
HDG2679091.1	aspartate aminotransferase family protein	Staphylococcus aureus	RIVM_M040612	GCA_027809755.1
HDG3874438.1	aspartate aminotransferase family protein	Staphylococcus aureus	RIVM_M040694	GCA_027819175.1
HDG3879864.1	aspartate aminotransferase family protein	Staphylococcus aureus	RIVM_M040706	GCA_027819255.1
HDG3904519.1	aspartate aminotransferase family protein	Staphylococcus aureus	RIVM_M040728	GCA_027819395.1
HDG3907561.1	aspartate aminotransferase family protein	Staphylococcus aureus	RIVM_M040732	GCA_027819415.1
HDG2804754.1	aspartate aminotransferase family protein	Staphylococcus aureus	RIVM_M040991	GCA_027810735.1
HDG3996651.1	aspartate aminotransferase family protein	Staphylococcus aureus	RIVM_M041068	GCA_027820015.1
HDG4001082.1	aspartate aminotransferase family protein	Staphylococcus aureus	RIVM_M041084	GCA_027820135.1
HDG4135679.1	aspartate aminotransferase family protein	Staphylococcus aureus	RIVM_M041449	GCA_027821135.1
HDG1400674.1	aspartate aminotransferase family protein	Staphylococcus aureus	RIVM_M041554	GCA_027799675.1
HDG4568701.1	aspartate aminotransferase family protein	Staphylococcus aureus	RIVM_M041753	GCA_027824235.1
HDG4177146.1	aspartate aminotransferase family protein	Staphylococcus aureus	RIVM_M041934	GCA_027821395.1
HDG4737711.1	aspartate aminotransferase family protein	Staphylococcus aureus	RIVM_M042366	GCA_027825455.1
HDG2595934.1	aspartate aminotransferase family protein	Staphylococcus aureus	RIVM_M042497	GCA_027809155.1
HDG4847209.1	aspartate aminotransferase family protein	Staphylococcus aureus	RIVM_M042712	GCA_027826255.1
HDG4479082.1	aspartate aminotransferase family protein	Staphylococcus aureus	RIVM_M042921	GCA_027823555.1
HDF3066071.1	aspartate aminotransferase family protein	Staphylococcus aureus	RIVM_M043015	GCA_027732125.1
HDF4666823.1	aspartate aminotransferase family protein	Staphylococcus aureus	RIVM_M043655	GCA_027745415.1
HDF4694927.1	aspartate aminotransferase family protein	Staphylococcus aureus	RIVM_M043739	GCA_027745635.1
HDF2621744.1	aspartate aminotransferase family protein	Staphylococcus aureus	RIVM_M043747	GCA_027728845.1
HDF3046870.1	aspartate aminotransferase family protein	Staphylococcus aureus	RIVM_M043782	GCA_027731915.1
HDF3702329.1	aspartate aminotransferase family protein	Staphylococcus aureus	RIVM_M043804	GCA_027736725.1
HDF3243994.1	aspartate aminotransferase family protein	Staphylococcus aureus	RIVM_M043808	GCA_027733345.1
HDF4791196.1	aspartate aminotransferase family protein	Staphylococcus aureus	RIVM_M044166	GCA_027746485.1
HDF3310966.1	aspartate aminotransferase family protein	Staphylococcus aureus	RIVM_M044314	GCA_027733955.1
HDF4492537.1	aspartate aminotransferase family protein	Staphylococcus aureus	RIVM_M044333	GCA_027743505.1
HDF3522369.1	aspartate aminotransferase family protein	Staphylococcus aureus	RIVM_M044582	GCA_027735445.1
HDF4522721.1	aspartate aminotransferase family protein	Staphylococcus aureus	RIVM_M044586	GCA_027744035.1
HDF4559388.1	aspartate aminotransferase family protein	Staphylococcus aureus	RIVM_M044644	GCA_027744455.1
HDF5224017.1	aspartate aminotransferase family protein	Staphylococcus aureus	RIVM_M044684	GCA_027750075.1
HDF4879641.1	aspartate aminotransferase family protein	Staphylococcus aureus	RIVM_M044832	GCA_027747175.1
HDF4900202.1	aspartate aminotransferase family protein	Staphylococcus aureus	RIVM_M044885	GCA_027747335.1
HDF4595159.1	aspartate aminotransferase family protein	Staphylococcus aureus	RIVM_M045206	GCA_027744855.1
HDF3293726.1	aspartate aminotransferase family protein	Staphylococcus aureus	RIVM_M045328	GCA_027733695.1
HDF4650591.1	aspartate aminotransferase family protein	Staphylococcus aureus	RIVM_M045576	GCA_027745335.1
HDF4947454.1	aspartate aminotransferase family protein	Staphylococcus aureus	RIVM_M045617	GCA_027747735.1
HDF5012893.1	aspartate aminotransferase family protein	Staphylococcus aureus	RIVM_M045710	GCA_027748215.1
HDF3010639.1	aspartate aminotransferase family protein	Staphylococcus aureus	RIVM_M045800	GCA_027731485.1
HDF4645564.1	aspartate aminotransferase family protein	Staphylococcus aureus	RIVM_M045924	GCA_027745675.1
HDE5208004.1	aspartate aminotransferase family protein	Staphylococcus aureus	RIVM_M047950	GCA_027642505.1
HDE3100248.1	aspartate aminotransferase family protein	Staphylococcus aureus	RIVM_M047992	GCA_027868145.1
HDF1889079.1	aspartate aminotransferase family protein	Staphylococcus aureus	RIVM_M048002	GCA_027722885.1
HDE3264060.1	aspartate aminotransferase family protein	Staphylococcus aureus	RIVM_M048038	GCA_027628725.1
HDE3242152.1	aspartate aminotransferase family protein	Staphylococcus aureus	RIVM_M048043	GCA_027628605.1
HDE3456496.1	aspartate aminotransferase family protein	Staphylococcus aureus	RIVM_M048284	GCA_027868445.1
HDE5069918.1	aspartate aminotransferase family protein	Staphylococcus aureus	RIVM_M048481	GCA_027641505.1
HDE5111742.1	aspartate aminotransferase family protein	Staphylococcus aureus	RIVM_M048514	GCA_027641765.1
HDE5131136.1	aspartate aminotransferase family protein	Staphylococcus aureus	RIVM_M048535	GCA_027641965.1
HDE5136553.1	aspartate aminotransferase family protein	Staphylococcus aureus	RIVM_M048538	GCA_027641945.1
HDE4420247.1	aspartate aminotransferase family protein	Staphylococcus aureus	RIVM_M048629	GCA_027636845.1
HDF1490744.1	aspartate aminotransferase family protein	Staphylococcus aureus	RIVM_M048700	GCA_027719905.1
HDF1540727.1	aspartate aminotransferase family protein	Staphylococcus aureus	RIVM_M048736	GCA_027720165.1
HDF1683128.1	aspartate aminotransferase family protein	Staphylococcus aureus	RIVM_M049173	GCA_027721185.1
HDF2168395.1	aspartate aminotransferase family protein	Staphylococcus aureus	RIVM_M081772	GCA_027725545.1
HDE5301860.1	aspartate aminotransferase family protein	Staphylococcus aureus	RIVM_M081981	GCA_027643145.1
HDF1781210.1	aspartate aminotransferase family protein	Staphylococcus aureus	RIVM_M082300	GCA_027721925.1
HDE4795670.1	aspartate aminotransferase family protein	Staphylococcus aureus	RIVM_M083135	GCA_027639465.1
HDF2008396.1	aspartate aminotransferase family protein	Staphylococcus aureus	RIVM_M083449	GCA_027724405.1
HDE5393043.1	aspartate aminotransferase family protein	Staphylococcus aureus	RIVM_M083721	GCA_027643825.1
HDF2097113.1	aspartate aminotransferase family protein	Staphylococcus aureus	RIVM_M084187	GCA_027725055.1
HDE4227750.1	aspartate aminotransferase family protein	Staphylococcus aureus	RIVM_M084288	GCA_027635425.1
HDE5747872.1	aspartate aminotransferase family protein	Staphylococcus aureus	RIVM_M084460	GCA_027646925.1
HDE6170738.1	aspartate aminotransferase family protein	Staphylococcus aureus	RIVM_M084723	GCA_027650085.1
HDF1131491.1	aspartate aminotransferase family protein	Staphylococcus aureus	RIVM_M084791	GCA_027716725.1
HDF1139673.1	aspartate aminotransferase family protein	Staphylococcus aureus	RIVM_M084792	GCA_027716765.1
HDE5844462.1	aspartate aminotransferase family protein	Staphylococcus aureus	RIVM_M084814	GCA_027647725.1
HDE3821717.1	aspartate aminotransferase family protein	Staphylococcus aureus	RIVM_M084857	GCA_027632405.1
HDE3970897.1	aspartate aminotransferase family protein	Staphylococcus aureus	RIVM_M084875	GCA_027868725.1
HDE5587247.1	aspartate aminotransferase family protein	Staphylococcus aureus	RIVM_M084879	GCA_027645665.1
HDE4363786.1	aspartate aminotransferase family protein	Staphylococcus aureus	RIVM_M084888	GCA_027636385.1
HDE6426638.1	aspartate aminotransferase family protein	Staphylococcus aureus	RIVM_M085309	GCA_027652025.1
HDE6473953.1	aspartate aminotransferase family protein	Staphylococcus aureus	RIVM_M085434	GCA_027868865.1
HDE6481840.1	aspartate aminotransferase family protein	Staphylococcus aureus	RIVM_M085446	GCA_027652285.1
HDE6576629.1	aspartate aminotransferase family protein	Staphylococcus aureus	RIVM_M086141	GCA_027869085.1
HDF1245694.1	aspartate aminotransferase family protein	Staphylococcus aureus	RIVM_M086211	GCA_027718045.1
HDF8626112.1	aspartate aminotransferase family protein	Staphylococcus aureus	RIVM_M086749	GCA_027776685.1
HDG0934415.1	aspartate aminotransferase family protein	Staphylococcus aureus	RIVM_M086935	GCA_027793015.1
HDF5462366.1	aspartate aminotransferase family protein	Staphylococcus aureus	RIVM_M086936	GCA_027751805.1
HDF7107966.1	aspartate aminotransferase family protein	Staphylococcus aureus	RIVM_M086986	GCA_027761925.1
HDF5890722.1	aspartate aminotransferase family protein	Staphylococcus aureus	RIVM_M086997	GCA_027755185.1
HDF7048264.1	aspartate aminotransferase family protein	Staphylococcus aureus	RIVM_M086998	GCA_027763565.1
HDF6375691.1	aspartate aminotransferase family protein	Staphylococcus aureus	RIVM_M087022	GCA_027758305.1
HDF6386763.1	aspartate aminotransferase family protein	Staphylococcus aureus	RIVM_M087036	GCA_027758445.1
HDF6542059.1	aspartate aminotransferase family protein	Staphylococcus aureus	RIVM_M087209	GCA_027758805.1
HDF7555697.1	aspartate aminotransferase family protein	Staphylococcus aureus	RIVM_M088523	GCA_027765925.1
HDF6428403.1	aspartate aminotransferase family protein	Staphylococcus aureus	RIVM_M089077	GCA_027759825.1
HDF8089901.1	aspartate aminotransferase family protein	Staphylococcus aureus	RIVM_M089329	GCA_027772565.1
HDF7233333.1	aspartate aminotransferase family protein	Staphylococcus aureus	RIVM_M089471	GCA_027761525.1
HEB5847705.1	aspartate aminotransferase family protein	Staphylococcus aureus	RIVM_M093386	GCA_032682075.1
AMX46107.1	pyridoxal-dependent decarboxylase	Staphylococcus aureus	RIVM6519	GCA_001618305.1
WP_032605060.1	aspartate aminotransferase family protein	Staphylococcus aureus	RR69	GCF_009765095.1
WP_032605060.1	aspartate aminotransferase family protein	Staphylococcus aureus	RR70	GCF_009765125.1
WP_032605060.1	aspartate aminotransferase family protein	Staphylococcus aureus	RR74	GCF_009765075.1
WP_032605060.1	aspartate aminotransferase family protein	Staphylococcus aureus	RR82	GCF_009765055.1
WP_032605060.1	aspartate aminotransferase family protein	Staphylococcus aureus	RR95	GCF_009765035.1
MVL73339.1	aminotransferase class V-fold PLP-dependent enzyme	Staphylococcus aureus	S_1068.LZPO.DN	GCA_009753585.1
MVM62916.1	aminotransferase class V-fold PLP-dependent enzyme	Staphylococcus aureus	S_1069.LNOY.AI	GCA_009754395.1
MVM42847.1	aminotransferase class V-fold PLP-dependent enzyme	Staphylococcus aureus	S_1069.LNOY.AN	GCA_009754355.1
MVM73098.1	aminotransferase class V-fold PLP-dependent enzyme	Staphylococcus aureus	S_1070.LYPU.AI	GCA_009754365.1
MVN03447.1	aminotransferase class V-fold PLP-dependent enzyme	Staphylococcus aureus	S_1098.LRUA.AI	GCA_009754225.1
MVM84401.1	aminotransferase class V-fold PLP-dependent enzyme	Staphylococcus aureus	S_1098.LRUA.AN	GCA_009754185.1
MVJ82782.1	aminotransferase class V-fold PLP-dependent enzyme	Staphylococcus aureus	S_3008.LEVR.AN	GCA_009752085.1
MVK37825.1	aminotransferase class V-fold PLP-dependent enzyme	Staphylococcus aureus	S_3030.LEPB.AN	GCA_009751985.1
MVJ03866.1	aminotransferase class V-fold PLP-dependent enzyme	Staphylococcus aureus	S_3030.LEPB.DN	GCA_009751765.1
HDM3089066.1	aspartate aminotransferase family protein	Staphylococcus aureus	S0026-3M-NS1-C1-C1-CL	GCA_028946865.1
HDM3097269.1	aspartate aminotransferase family protein	Staphylococcus aureus	S0026-3M-NS1-C1-C2-CL	GCA_028946885.1
HDM3102621.1	aspartate aminotransferase family protein	Staphylococcus aureus	S0026-3M-NS1-C1-C3-CL	GCA_028946925.1
HDM3105282.1	aspartate aminotransferase family protein	Staphylococcus aureus	S0026-3M-NS1-C1-C4-CL	GCA_028946905.1
HDM3086440.1	aspartate aminotransferase family protein	Staphylococcus aureus	S0026-3M-NS1-C1-C5-CL	GCA_028946965.1
HDM3107931.1	aspartate aminotransferase family protein	Staphylococcus aureus	S0026-3M-NS1-C1-C6-CL	GCA_028946945.1
HDM3110605.1	aspartate aminotransferase family protein	Staphylococcus aureus	S0026-3M-NS1-C1-C7-CL	GCA_028947005.1
HDM3115897.1	aspartate aminotransferase family protein	Staphylococcus aureus	S0026-3M-NS1-C1-C8-CL	GCA_028946985.1
HDM3113231.1	aspartate aminotransferase family protein	Staphylococcus aureus	S0026-3M-NS1-C1-CP-CL	GCA_028947025.1
HDM7934431.1	aspartate aminotransferase family protein	Staphylococcus aureus	S0026-3M-OS1-C1-C1-CL	GCA_028987445.1
HDL9241235.1	aspartate aminotransferase family protein	Staphylococcus aureus	S0026-3M-OS1-C1-C2-CL	GCA_028903565.1
HDM7937077.1	aspartate aminotransferase family protein	Staphylococcus aureus	S0026-3M-OS1-C1-C3-CL	GCA_028987465.1
HDM7955858.1	aspartate aminotransferase family protein	Staphylococcus aureus	S0026-3M-OS1-C1-C4-CL	GCA_028987495.1
HDM7939729.1	aspartate aminotransferase family protein	Staphylococcus aureus	S0026-3M-OS1-C1-C5-CL	GCA_028987525.1
HDM7942400.1	aspartate aminotransferase family protein	Staphylococcus aureus	S0026-3M-OS1-C1-C6-CL	GCA_028987565.1
HDL9345785.1	aspartate aminotransferase family protein	Staphylococcus aureus	S0026-3M-OS1-C1-C7-CL	GCA_028904605.1
HDM7945018.1	aspartate aminotransferase family protein	Staphylococcus aureus	S0026-3M-OS1-C1-C8-CL	GCA_028987545.1
HDM7950554.1	aspartate aminotransferase family protein	Staphylococcus aureus	S0026-3M-OS1-C1-CP-CL	GCA_028987485.1
HDM3876819.1	aspartate aminotransferase family protein	Staphylococcus aureus	S0026-En-NS1-C1-C1-CL	GCA_028952465.1
HDM3874186.1	aspartate aminotransferase family protein	Staphylococcus aureus	S0026-En-NS1-C1-C2-CL	GCA_028952525.1
HDM3879475.1	aspartate aminotransferase family protein	Staphylococcus aureus	S0026-En-NS1-C1-C3-CL	GCA_028952485.1
HDM3882126.1	aspartate aminotransferase family protein	Staphylococcus aureus	S0026-En-NS1-C1-C4-CL	GCA_028952545.1
HDM3884786.1	aspartate aminotransferase family protein	Staphylococcus aureus	S0026-En-NS1-C1-C5-CL	GCA_028952505.1
HDM3893151.1	aspartate aminotransferase family protein	Staphylococcus aureus	S0026-En-NS1-C1-C6-CL	GCA_028952565.1
HDM3895781.1	aspartate aminotransferase family protein	Staphylococcus aureus	S0026-En-NS1-C1-C7-CL	GCA_028952585.1
HDM3887471.1	aspartate aminotransferase family protein	Staphylococcus aureus	S0026-En-NS1-C1-C8-CL	GCA_028952605.1
HDM4024241.1	aspartate aminotransferase family protein	Staphylococcus aureus	S0026-En-NS1-C1-CP-CL	GCA_028953565.1
HDM4199198.1	aspartate aminotransferase family protein	Staphylococcus aureus	S0026-III	GCA_028955065.1
RYV31996.1	aminotransferase class V-fold PLP-dependent enzyme	Staphylococcus aureus	S1	GCF_004168755.1
MCQ6740381.1	aspartate aminotransferase family protein	Staphylococcus aureus	S1-1-60	GCA_024497335.1
MCQ6742977.1	aspartate aminotransferase family protein	Staphylococcus aureus	S1-2-4	GCA_024548485.1
RYV28699.1	aminotransferase class V-fold PLP-dependent enzyme	Staphylococcus aureus	S2	GCF_004168845.1
USR22692.1	aspartate aminotransferase family protein	Staphylococcus aureus	S36	GCA_020702515.2
QOE20451.1	aminotransferase class V-fold PLP-dependent enzyme	Staphylococcus aureus	SA H29	GCA_014792845.1
WP_032605060.1	aspartate aminotransferase family protein	Staphylococcus aureus	SA02-SX	GCF_030534235.1
WP_032605060.1	aspartate aminotransferase family protein	Staphylococcus aureus	SA10-SX	GCF_030534075.1
HDL5285213.1	aspartate aminotransferase family protein	Staphylococcus aureus	SA1102	GCA_028808275.1
HDL4457822.1	aspartate aminotransferase family protein	Staphylococcus aureus	SA1111	GCA_028799785.1
HDL4466108.1	aspartate aminotransferase family protein	Staphylococcus aureus	SA1129	GCA_028799825.1
HDL4720133.1	aspartate aminotransferase family protein	Staphylococcus aureus	SA1130	GCA_028802045.1
HDL4733989.1	aspartate aminotransferase family protein	Staphylococcus aureus	SA1155	GCA_028802135.1
HDL4741593.1	aspartate aminotransferase family protein	Staphylococcus aureus	SA1158	GCA_028802175.1
HDL4747859.1	aspartate aminotransferase family protein	Staphylococcus aureus	SA1159	GCA_028802165.1
HDL4476468.1	aspartate aminotransferase family protein	Staphylococcus aureus	SA1161	GCA_028799885.1
HDL4756060.1	aspartate aminotransferase family protein	Staphylococcus aureus	SA1223	GCA_028802245.1
HDL4474118.1	aspartate aminotransferase family protein	Staphylococcus aureus	SA1261	GCA_028799945.1
WP_032605060.1	aspartate aminotransferase family protein	Staphylococcus aureus	SA18-SX	GCF_030533915.1
WP_032605060.1	aspartate aminotransferase family protein	Staphylococcus aureus	SA20-SX	GCF_030533875.1
WP_032605060.1	aspartate aminotransferase family protein	Staphylococcus aureus	SA33-SX	GCF_030533585.1
WP_032605060.1	aspartate aminotransferase family protein	Staphylococcus aureus	SA34-SX	GCF_030533555.1
WP_032605060.1	aspartate aminotransferase family protein	Staphylococcus aureus	SA37-SX	GCF_030533495.1
MCC5194432.1	aspartate aminotransferase family protein	Staphylococcus aureus	SAi21_05H1	GCA_020820535.1
PZL78439.1	aminotransferase class V-fold PLP-dependent enzyme	Staphylococcus aureus	SAUR1516	GCF_003236225.1
WP_032605060.1	aspartate aminotransferase family protein	Staphylococcus aureus	SC1	GCF_030403845.1
WP_032605060.1	aspartate aminotransferase family protein	Staphylococcus aureus	SC2	GCF_030403865.1
WP_032605060.1	aspartate aminotransferase family protein	Staphylococcus aureus	SC4	GCF_030403875.1
WP_032605060.1	aspartate aminotransferase family protein	Staphylococcus aureus	SC5	GCF_030403935.1
CAC5668102.1	pyridoxal-deC	Staphylococcus aureus	SG107	GCA_903799285.1
CAC5668048.1	pyridoxal-deC	Staphylococcus aureus	SG108	GCA_903799275.1
CAC5692792.1	pyridoxal-deC	Staphylococcus aureus	SG115	GCA_903799355.1
CAC5771917.1	pyridoxal-deC	Staphylococcus aureus	SG145	GCA_903799645.1
CAC5578818.1	pyridoxal-deC	Staphylococcus aureus	SG63	GCA_903798935.1
WP_032605060.1	aspartate aminotransferase family protein	Staphylococcus aureus	SH1	GCF_030403925.1
HCZ1866587.1	aspartate aminotransferase family protein	Staphylococcus aureus	SH13067	GCA_026870575.1
WP_032605060.1	aspartate aminotransferase family protein	Staphylococcus aureus	SH2	GCF_030403965.1
MCE3348523.1	aspartate aminotransferase family protein	Staphylococcus aureus	SH-6	GCA_021327895.1
MCT0117737.1	aspartate aminotransferase family protein	Staphylococcus aureus	SJTUF21455	GCA_025127805.1
MCE7827303.1	aspartate aminotransferase family protein	Staphylococcus aureus	SKLX100316	GCA_021404285.1
HCV8734970.1	aspartate aminotransferase family protein	Staphylococcus aureus	SKLX100319	GCA_026516205.1
MCE7832955.1	aspartate aminotransferase family protein	Staphylococcus aureus	SKLX100539	GCA_021404025.1
HCV8371871.1	aspartate aminotransferase family protein	Staphylococcus aureus	SKLX100675	GCA_026513165.1
MCE7829946.1	aspartate aminotransferase family protein	Staphylococcus aureus	SKLX101489	GCA_021403975.1
HCV9149391.1	aspartate aminotransferase family protein	Staphylococcus aureus	SKLX102503	GCA_026520535.1
MCE7835845.1	aspartate aminotransferase family protein	Staphylococcus aureus	SKLX102523	GCA_021403955.1
HCV8831121.1	aspartate aminotransferase family protein	Staphylococcus aureus	SKLX107461	GCA_026517205.1
HCV8138092.1	aspartate aminotransferase family protein	Staphylococcus aureus	SKLX108304	GCA_026511425.1
MCE7837940.1	aspartate aminotransferase family protein	Staphylococcus aureus	SKLX108615	GCA_021403925.1
HCV8768663.1	aspartate aminotransferase family protein	Staphylococcus aureus	SKLX108650	GCA_026516665.1
HCW0008282.1	aspartate aminotransferase family protein	Staphylococcus aureus	SKLX109209	GCA_026529555.1
HCV9512754.1	aspartate aminotransferase family protein	Staphylococcus aureus	SKLX113971	GCA_026526875.1
HCV8700266.1	aspartate aminotransferase family protein	Staphylococcus aureus	SKLX115129	GCA_026516005.1
HCV8703385.1	aspartate aminotransferase family protein	Staphylococcus aureus	SKLX115138	GCA_026516025.1
HCV9068160.1	aspartate aminotransferase family protein	Staphylococcus aureus	SKLX116114	GCA_026519525.1
MCE7840732.1	aspartate aminotransferase family protein	Staphylococcus aureus	SKLX116135	GCA_021403885.1
HCV7895902.1	aspartate aminotransferase family protein	Staphylococcus aureus	SKLX117468	GCA_026509565.1
HCV7797903.1	aspartate aminotransferase family protein	Staphylococcus aureus	SKLX119012	GCA_026508545.1
MCE7841810.1	aspartate aminotransferase family protein	Staphylococcus aureus	SKLX119044	GCA_021403905.1
MCE7844706.1	aspartate aminotransferase family protein	Staphylococcus aureus	SKLX119055	GCA_021404165.1
HCV8573745.1	aspartate aminotransferase family protein	Staphylococcus aureus	SKLX36764	GCA_026514785.1
HCV9446540.1	aspartate aminotransferase family protein	Staphylococcus aureus	SKLX50636	GCA_026526415.1
HCV7860003.1	aspartate aminotransferase family protein	Staphylococcus aureus	SKLX51492	GCA_026509165.1
HCV7854191.1	aspartate aminotransferase family protein	Staphylococcus aureus	SKLX51793	GCA_026509185.1
HCV7728782.1	aspartate aminotransferase family protein	Staphylococcus aureus	SKLX53001	GCA_026508045.1
HCV7616752.1	aspartate aminotransferase family protein	Staphylococcus aureus	SKLX53479	GCA_026507255.1
HCV8631329.1	aspartate aminotransferase family protein	Staphylococcus aureus	SKLX54695	GCA_026515205.1
HCV8637545.1	aspartate aminotransferase family protein	Staphylococcus aureus	SKLX54749	GCA_026515265.1
HCV7995369.1	aspartate aminotransferase family protein	Staphylococcus aureus	SKLX55416	GCA_026510165.1
HCV7992618.1	aspartate aminotransferase family protein	Staphylococcus aureus	SKLX55421	GCA_026510175.1
HCW0026638.1	aspartate aminotransferase family protein	Staphylococcus aureus	SKLX55422	GCA_026529695.1
HCV8842157.1	aspartate aminotransferase family protein	Staphylococcus aureus	SKLX55521	GCA_026517165.1
HCW0053533.1	aspartate aminotransferase family protein	Staphylococcus aureus	SKLX56302	GCA_026529815.1
HCV8930285.1	aspartate aminotransferase family protein	Staphylococcus aureus	SKLX56590	GCA_026518065.1
HCV8935840.1	aspartate aminotransferase family protein	Staphylococcus aureus	SKLX56609	GCA_026518105.1
HCV7765292.1	aspartate aminotransferase family protein	Staphylococcus aureus	SKLX57282	GCA_026508295.1
HCV8130713.1	aspartate aminotransferase family protein	Staphylococcus aureus	SKLX58002	GCA_026511405.1
HCV7848932.1	aspartate aminotransferase family protein	Staphylococcus aureus	SKLX58004	GCA_026509085.1
HCV8543751.1	aspartate aminotransferase family protein	Staphylococcus aureus	SKLX58351	GCA_026514585.1
HCV9124367.1	aspartate aminotransferase family protein	Staphylococcus aureus	SKLX58725	GCA_026520265.1
HCV8172552.1	aspartate aminotransferase family protein	Staphylococcus aureus	SKLX58958	GCA_026511725.1
HCV8529643.1	aspartate aminotransferase family protein	Staphylococcus aureus	SKLX59931	GCA_026514365.1
HCV7806271.1	aspartate aminotransferase family protein	Staphylococcus aureus	SKLX59942	GCA_026508615.1
HCV8908502.1	aspartate aminotransferase family protein	Staphylococcus aureus	SKLX59978	GCA_026517805.1
HCV9479603.1	aspartate aminotransferase family protein	Staphylococcus aureus	SKLX60246	GCA_026526635.1
HCV9196053.1	aspartate aminotransferase family protein	Staphylococcus aureus	SKLX60371	GCA_026520815.1
MCE7850967.1	aspartate aminotransferase family protein	Staphylococcus aureus	SKLX60562	GCA_021404075.1
HCV9023154.1	aspartate aminotransferase family protein	Staphylococcus aureus	SKLX61303	GCA_026518725.1
HCV9039380.1	aspartate aminotransferase family protein	Staphylococcus aureus	SKLX61393	GCA_026518765.1
HCV9051070.1	aspartate aminotransferase family protein	Staphylococcus aureus	SKLX63071	GCA_026519405.1
HCV8422042.1	aspartate aminotransferase family protein	Staphylococcus aureus	SKLX63908	GCA_026513545.1
HCV8178986.1	aspartate aminotransferase family protein	Staphylococcus aureus	SKLX70439	GCA_026511745.1
HCV7934915.1	aspartate aminotransferase family protein	Staphylococcus aureus	SKLX77782	GCA_026509705.1
HCV8894080.1	aspartate aminotransferase family protein	Staphylococcus aureus	SKLX79371	GCA_026517885.1
MCE7854134.1	aspartate aminotransferase family protein	Staphylococcus aureus	SKLX80731	GCA_021404005.1
HCV9393761.1	aspartate aminotransferase family protein	Staphylococcus aureus	SKLX81816	GCA_026526015.1
HCV9401809.1	aspartate aminotransferase family protein	Staphylococcus aureus	SKLX82790	GCA_026526075.1
MCE7848613.1	aspartate aminotransferase family protein	Staphylococcus aureus	SKLX83059	GCA_021403865.1
HCV8489575.1	aspartate aminotransferase family protein	Staphylococcus aureus	SKLX85755	GCA_026513925.1
HCV9432353.1	aspartate aminotransferase family protein	Staphylococcus aureus	SKLX87136	GCA_026526355.1
HCV9435091.1	aspartate aminotransferase family protein	Staphylococcus aureus	SKLX87194	GCA_026526295.1
HCV9275419.1	aspartate aminotransferase family protein	Staphylococcus aureus	SKLX88663	GCA_026525075.1
HCV8052908.1	aspartate aminotransferase family protein	Staphylococcus aureus	SKLX89369	GCA_026510685.1
HCV9135822.1	aspartate aminotransferase family protein	Staphylococcus aureus	SKLX94276	GCA_026520345.1
HCV9138560.1	aspartate aminotransferase family protein	Staphylococcus aureus	SKLX94289	GCA_026520415.1
HCV8408137.1	aspartate aminotransferase family protein	Staphylococcus aureus	SKLX94343	GCA_026513445.1
HCV7901301.1	aspartate aminotransferase family protein	Staphylococcus aureus	SKLX94352	GCA_026509485.1
HCV9357013.1	aspartate aminotransferase family protein	Staphylococcus aureus	SKLX99456	GCA_026525635.1
HDB3095888.1	aspartate aminotransferase family protein	Staphylococcus aureus	SS_0492	GCA_027163525.1
MCC2078005.1	aspartate aminotransferase family protein	Staphylococcus aureus	SS260_SA_UNIFESP	GCA_020682925.1
HEA5999113.1	aspartate aminotransferase family protein	Staphylococcus aureus	ST20141965	GCA_032393225.1
HEA5928219.1	aspartate aminotransferase family protein	Staphylococcus aureus	ST20152009	GCA_032392695.1
CYA22712.1	pyridoxal-deC	Staphylococcus aureus	st2396	GCA_900045165.1
CYG16953.1	pyridoxal-deC	Staphylococcus aureus	st3047	GCA_900057345.1
HDK3001602.1	aspartate aminotransferase family protein	Staphylococcus aureus	ST398	GCA_028509655.1
CXO22049.1	pyridoxal-deC	Staphylococcus aureus	st427	GCA_900037695.1
CXK31304.1	pyridoxal-deC	Staphylococcus aureus	st430	GCA_900045775.1
CXE70447.1	pyridoxal-deC	Staphylococcus aureus	st830	GCA_900033755.1
CXV25627.1	pyridoxal-deC	Staphylococcus aureus	st970	GCA_900041995.1
HDJ5604126.1	aspartate aminotransferase family protein	Staphylococcus aureus	SWF_13	GCA_028422585.1
HDJ5537670.1	aspartate aminotransferase family protein	Staphylococcus aureus	SWF_2	GCA_028422205.1
HDK7750544.1	aspartate aminotransferase family protein	Staphylococcus aureus	TJ_026	GCA_028586985.1
HDK7600625.1	aspartate aminotransferase family protein	Staphylococcus aureus	TJ_034	GCA_028585615.1
HDK7805316.1	aspartate aminotransferase family protein	Staphylococcus aureus	TJ_077	GCA_028587305.1
HDK7877072.1	aspartate aminotransferase family protein	Staphylococcus aureus	TJ_112	GCA_028588005.1
HDK7696747.1	aspartate aminotransferase family protein	Staphylococcus aureus	TJ_119	GCA_028586415.1
HDK7883631.1	aspartate aminotransferase family protein	Staphylococcus aureus	TJ_164	GCA_028588025.1
HDK7552293.1	aspartate aminotransferase family protein	Staphylococcus aureus	TJ_165	GCA_028585155.1
HDK7576390.1	aspartate aminotransferase family protein	Staphylococcus aureus	TJ_178	GCA_028585315.1
HDK7444272.1	aspartate aminotransferase family protein	Staphylococcus aureus	TJ_183	GCA_028584165.1
WP_032605060.1	aspartate aminotransferase family protein	Staphylococcus aureus	TSAR01	GCF_002247015.1
WP_032605060.1	aspartate aminotransferase family protein	Staphylococcus aureus	TSAR05	GCF_002247315.1
BAK57494.1	hypothetical protein	Staphylococcus aureus	TSGH17 (= JCSC7190)
XDH17529.1	aspartate aminotransferase family protein	Staphylococcus aureus	TUM22457	GCA_040931795.1
XDH16193.1	aspartate aminotransferase family protein	Staphylococcus aureus	TUM22458	GCA_040931785.1
WP_032605060.1	aspartate aminotransferase family protein	Staphylococcus aureus	UA757	GCF_002887295.1
NGQ22816.1	aspartate aminotransferase family protein	Staphylococcus aureus	UA807	GCA_011059355.1
AEV42174.1	pyridoxal-dependent decarboxylase	Staphylococcus aureus	UMCG-M4
HCV5654628.1	aspartate aminotransferase family protein	Staphylococcus aureus	USA500	GCA_026493905.1
QEM84304.1	aminotransferase class V-fold PLP-dependent enzyme	Staphylococcus aureus	VGC1	GCF_008330045.1
RYV27639.1	aminotransferase class V-fold PLP-dependent enzyme	Staphylococcus aureus	W	GCA_004168805.1
AFI61402.1	hypothetical protein	Staphylococcus aureus	WA MRSA-40
HDT6654437.1	aspartate aminotransferase family protein	Staphylococcus aureus	WCHSA110004	GCA_030897505.1
HDT6640483.1	aspartate aminotransferase family protein	Staphylococcus aureus	WCHSA110007	GCA_030897485.1
HDT6635312.1	aspartate aminotransferase family protein	Staphylococcus aureus	WCHSA110009	GCA_030897445.1
HDT6664653.1	aspartate aminotransferase family protein	Staphylococcus aureus	WCHSA110010	GCA_030897465.1
HDT6659390.1	aspartate aminotransferase family protein	Staphylococcus aureus	WCHSA110011	GCA_030897405.1
HDT6642799.1	aspartate aminotransferase family protein	Staphylococcus aureus	WCHSA110012	GCA_030897545.1
TLW15622.1	aspartate aminotransferase family protein	Staphylococcus aureus	YNSA115	GCF_005861285.1
TLW23728.1	aspartate aminotransferase family protein	Staphylococcus aureus	YNSA119	GCF_005861295.1
TLV98139.1	aspartate aminotransferase family protein	Staphylococcus aureus	YNSA132	GCF_005861275.1
TLV99473.1	aspartate aminotransferase family protein	Staphylococcus aureus	YNSA144	GCF_005861195.1
TLV81597.1	aspartate aminotransferase family protein	Staphylococcus aureus	YNSA154	GCF_005861825.1
TLV73230.1	aspartate aminotransferase family protein	Staphylococcus aureus	YNSA210	GCF_005861085.1
TLV80188.1	aspartate aminotransferase family protein	Staphylococcus aureus	YNSA252	GCF_005861095.1
TLV75795.1	aspartate aminotransferase family protein	Staphylococcus aureus	YNSA279	GCF_005861015.1
TLW47641.1	aspartate aminotransferase family protein	Staphylococcus aureus	YNSA53	GCF_005861935.1
MUG18007.1	aminotransferase class V-fold PLP-dependent enzyme	Staphylococcus aureus	YS06	GCF_009725595.1
MUG53802.1	aminotransferase class V-fold PLP-dependent enzyme	Staphylococcus aureus	YS17	GCF_009725345.1
WP_032605060.1	aspartate aminotransferase family protein	Staphylococcus aureus	Zilean	GCF_026625385.1
QGM75475.1	aminotransferase class V-fold PLP-dependent enzyme	Staphylococcus aureus	ZY05	GCA_009684655.1
HCW7519405.1	aspartate aminotransferase family protein	Staphylococcus aureus		GCA_026589635.1
HCU8764583.1	aspartate aminotransferase family protein	Staphylococcus aureus		GCA_026438155.1
HCU8766614.1	aspartate aminotransferase family protein	Staphylococcus aureus		GCA_026438155.1
HCX1974487.1	aspartate aminotransferase family protein	Staphylococcus aureus		GCA_026644485.1
HDA1341425.1	aspartate aminotransferase family protein	Staphylococcus aureus		GCA_026980705.1
HDK4176298.1	aspartate aminotransferase family protein	Staphylococcus aureus		GCA_028535435.1
HDK9656185.1	aspartate aminotransferase family protein	Staphylococcus aureus		GCA_028668055.1
HDK9658646.1	aspartate aminotransferase family protein	Staphylococcus aureus		GCA_028668055.1
HDK9694994.1	aspartate aminotransferase family protein	Staphylococcus aureus		GCA_028668695.1
HDK9695482.1	aspartate aminotransferase family protein	Staphylococcus aureus		GCA_028668695.1
HDL4786295.1	aspartate aminotransferase family protein	Staphylococcus aureus		GCA_028802495.1
HDL4822936.1	aspartate aminotransferase family protein	Staphylococcus aureus		GCA_028803005.1
BAH57704.1	hypothetical protein	Staphylococcus aureus	PM1	GCF_000308895.1
AEV77162.1	aspartate aminotransferase family protein	Staphylococcus aureus subsp. aureus	M013	GCF_000237125.2
AGW32561.1	hypothetical protein	Staphylococcus aureus subsp. aureus	SA957	GCF_000470845.1
WP_032605060.1	aspartate aminotransferase family protein	Staphylococcus capitis subsp. urealyticus	Sc1516941	GCF_040736585.1
KOR12662.1	pyridoxal-dependent decarboxylase	Staphylococcus carnosus	336	GCA_001276205.1
QPT03095.1	aspartate aminotransferase family protein	Staphylococcus carnosus	FDAARGOS_883	GCA_016028275.1
UQA68098.1	aspartate aminotransferase family protein	Staphylococcus carnosus	KCTC 3580	GCA_023277485.1
ANZ34409.1	pyridoxal-dependent decarboxylase	Staphylococcus carnosus	LTH 3730; SK 13; JCM 6069	GCA_001701005.1
GEP77748.1	pyridoxal-dependent decarboxylase	Staphylococcus carnosus	NBRC 109622	GCA_007992595.1
SUL89052.1	pyridoxal-deC	Staphylococcus carnosus	NCTC13825	GCA_900458435.1
UTB77080.1	pyridoxal-dependent decarboxylase	Staphylococcus carnosus	TMW 2.146	GCA_024172345.1
UTB79501.1	pyridoxal-dependent decarboxylase	Staphylococcus carnosus	TMW 2.212	GCA_024172365.1
UTB84268.1	pyridoxal-dependent decarboxylase	Staphylococcus carnosus	TMW 2.218	GCA_024172405.1
UTB86630.1	pyridoxal-dependent decarboxylase	Staphylococcus carnosus	TMW 2.243	GCA_024172425.1
WP_015901684.1	aspartate aminotransferase family protein	Staphylococcus carnosus	TMW 2.2515	GCF_037104805.1
UTB88976.1	pyridoxal-dependent decarboxylase	Staphylococcus carnosus	TMW 2.269	GCA_024172445.1
WP_015901684.1	aspartate aminotransferase family protein	Staphylococcus carnosus		GCF_925297965.1
CAL29349.1	conserved hypothetical protein	Staphylococcus carnosus subsp. carnosus	TM300	GCA_000009405.1
MBA8763040.1	aminotransferase class I/II-fold pyridoxal phosphate-dependent enzyme	Staphylococcus coagulans	65195	GCA_014129505.1
MBA8773160.1	aminotransferase class I/II-fold pyridoxal phosphate-dependent enzyme	Staphylococcus coagulans	66170	GCA_014129435.1
MBT2810709.1	aminotransferase class I/II-fold pyridoxal phosphate-dependent enzyme	Staphylococcus coagulans	78830	GCA_018616515.1
MBT2814215.1	aminotransferase class I/II-fold pyridoxal phosphate-dependent enzyme	Staphylococcus coagulans	78868	GCA_018617005.1
MBT2813091.1	aminotransferase class I/II-fold pyridoxal phosphate-dependent enzyme	Staphylococcus coagulans	79099	GCA_018617055.1
MBT2816535.1	aminotransferase class I/II-fold pyridoxal phosphate-dependent enzyme	Staphylococcus coagulans	79320	GCA_018616995.1
MBT2826726.1	aminotransferase class I/II-fold pyridoxal phosphate-dependent enzyme	Staphylococcus coagulans	79461	GCA_018616975.1
MBT2822143.1	aminotransferase class I/II-fold pyridoxal phosphate-dependent enzyme	Staphylococcus coagulans	81701	GCA_018616955.1
MBT2819922.1	aminotransferase class I/II-fold pyridoxal phosphate-dependent enzyme	Staphylococcus coagulans	83390	GCA_018616895.1
MBT2829671.1	aminotransferase class I/II-fold pyridoxal phosphate-dependent enzyme	Staphylococcus coagulans	86039	GCA_018616905.1
MBT2854019.1	aminotransferase class I/II-fold pyridoxal phosphate-dependent enzyme	Staphylococcus coagulans	88276	GCA_018616935.1
MBT2840566.1	aminotransferase class I/II-fold pyridoxal phosphate-dependent enzyme	Staphylococcus coagulans	88282	GCA_018616875.1
MBT2848440.1	aminotransferase class I/II-fold pyridoxal phosphate-dependent enzyme	Staphylococcus coagulans	89507	GCA_018616835.1
MBT2833594.1	aminotransferase class I/II-fold pyridoxal phosphate-dependent enzyme	Staphylococcus coagulans	89657	GCA_018616845.1
MBT2850780.1	aminotransferase class I/II-fold pyridoxal phosphate-dependent enzyme	Staphylococcus coagulans	91171	GCA_018616775.1
MBT2829001.1	aminotransferase class I/II-fold pyridoxal phosphate-dependent enzyme	Staphylococcus coagulans	94233	GCA_018616795.1
MBT2824424.1	aminotransferase class I/II-fold pyridoxal phosphate-dependent enzyme	Staphylococcus coagulans	94832	GCA_018616805.1
UNB49477.1	aminotransferase class I/II-fold pyridoxal phosphate-dependent enzyme	Staphylococcus coagulans	1031336	GCA_022557135.1
UNB47111.1	aminotransferase class I/II-fold pyridoxal phosphate-dependent enzyme	Staphylococcus coagulans	1031373	GCA_022557115.1
WP_144416450.1	aminotransferase class I/II-fold pyridoxal phosphate-dependent enzyme	Staphylococcus coagulans	16SAD2	GCF_040408445.1
WP_128382827.1	aminotransferase class I/II-fold pyridoxal phosphate-dependent enzyme	Staphylococcus coagulans	26SDR1	GCF_040408475.1
WP_144416450.1	aminotransferase class I/II-fold pyridoxal phosphate-dependent enzyme	Staphylococcus coagulans	27TR1	GCF_040408485.1
WP_128382827.1	aminotransferase class I/II-fold pyridoxal phosphate-dependent enzyme	Staphylococcus coagulans	2SAER	GCF_040408645.1
WP_128382827.1	aminotransferase class I/II-fold pyridoxal phosphate-dependent enzyme	Staphylococcus coagulans	57SADr1	GCF_040408455.1
WP_128382827.1	aminotransferase class I/II-fold pyridoxal phosphate-dependent enzyme	Staphylococcus coagulans	63SDr3	GCF_040408375.1
WP_128382827.1	aminotransferase class I/II-fold pyridoxal phosphate-dependent enzyme	Staphylococcus coagulans	63T1	GCF_040408415.1
WP_128382827.1	aminotransferase class I/II-fold pyridoxal phosphate-dependent enzyme	Staphylococcus coagulans	64SD3	GCF_040408345.1
WP_144416450.1	aminotransferase class I/II-fold pyridoxal phosphate-dependent enzyme	Staphylococcus coagulans	64T3	GCF_040408355.1
MBT2845190.1	aminotransferase class I/II-fold pyridoxal phosphate-dependent enzyme	Staphylococcus coagulans	91460c	GCA_018616755.1
WP_144416450.1	aminotransferase class I/II-fold pyridoxal phosphate-dependent enzyme	Staphylococcus coagulans	9SAD2	GCF_040408565.1
MBA8762887.1	aminotransferase class I/II-fold pyridoxal phosphate-dependent enzyme	Staphylococcus coagulans	A/G16/00/1	GCA_014129425.1
MDU9293102.1	aminotransferase class I/II-fold pyridoxal phosphate-dependent enzyme	Staphylococcus coagulans	A330	GCA_032602755.1
MDU9281042.1	aminotransferase class I/II-fold pyridoxal phosphate-dependent enzyme	Staphylococcus coagulans	A416	GCA_032602665.1
MDU9267412.1	aminotransferase class I/II-fold pyridoxal phosphate-dependent enzyme	Staphylococcus coagulans	A727	GCA_032602705.1
MDU9303678.1	aminotransferase class I/II-fold pyridoxal phosphate-dependent enzyme	Staphylococcus coagulans	A821	GCA_032602695.1
MDU9322540.1	aminotransferase class I/II-fold pyridoxal phosphate-dependent enzyme	Staphylococcus coagulans	B076	GCA_032602625.1
MDU9334414.1	aminotransferase class I/II-fold pyridoxal phosphate-dependent enzyme	Staphylococcus coagulans	B299	GCA_032602565.1
MDU9341848.1	aminotransferase class I/II-fold pyridoxal phosphate-dependent enzyme	Staphylococcus coagulans	B449	GCA_032602525.1
PNZ10338.1	tyrosine decarboxylase	Staphylococcus coagulans	DSM 6628	GCA_002901995.1
WP_128382827.1	aminotransferase class I/II-fold pyridoxal phosphate-dependent enzyme	Staphylococcus coagulans	LB1605	GCF_037890475.1
WP_144416450.1	aminotransferase class I/II-fold pyridoxal phosphate-dependent enzyme	Staphylococcus coagulans	LB16121	GCF_037890425.1
WP_144416450.1	aminotransferase class I/II-fold pyridoxal phosphate-dependent enzyme	Staphylococcus coagulans	LB1622	GCF_037890465.1
WP_144416450.1	aminotransferase class I/II-fold pyridoxal phosphate-dependent enzyme	Staphylococcus coagulans	LB1624	GCF_037890445.1
WP_128382827.1	aminotransferase class I/II-fold pyridoxal phosphate-dependent enzyme	Staphylococcus coagulans	LB1641	GCF_037890405.1
WP_128382827.1	aminotransferase class I/II-fold pyridoxal phosphate-dependent enzyme	Staphylococcus coagulans	LB1642	GCF_037890625.1
WP_128382827.1	aminotransferase class I/II-fold pyridoxal phosphate-dependent enzyme	Staphylococcus coagulans	LB1646	GCF_037890565.1
WP_128382827.1	aminotransferase class I/II-fold pyridoxal phosphate-dependent enzyme	Staphylococcus coagulans	LB1664	GCF_037890585.1
WP_128382827.1	aminotransferase class I/II-fold pyridoxal phosphate-dependent enzyme	Staphylococcus coagulans	LB1682	GCF_037890525.1
MBU3871850.1	aminotransferase class I/II-fold pyridoxal phosphate-dependent enzyme	Staphylococcus coagulans	M2043/98/1	GCA_018885415.1
MBA8771487.1	aminotransferase class I/II-fold pyridoxal phosphate-dependent enzyme	Staphylococcus coagulans	M31/11/1	GCA_014129325.1
MBA8777907.1	aminotransferase class I/II-fold pyridoxal phosphate-dependent enzyme	Staphylococcus coagulans	M611545/16/1	GCA_014129345.1
MBA8775524.1	aminotransferase class I/II-fold pyridoxal phosphate-dependent enzyme	Staphylococcus coagulans	M615/02/4	GCA_014129335.1
MBT2847396.1	aminotransferase class I/II-fold pyridoxal phosphate-dependent enzyme	Staphylococcus coagulans	p1135317838	GCA_018616695.1
MBT2835991.1	aminotransferase class I/II-fold pyridoxal phosphate-dependent enzyme	Staphylococcus coagulans	p15691995	GCA_018616705.1
MBT2858580.1	aminotransferase class I/II-fold pyridoxal phosphate-dependent enzyme	Staphylococcus coagulans	p1691527012	GCA_018616605.1
MBT2863182.1	aminotransferase class I/II-fold pyridoxal phosphate-dependent enzyme	Staphylococcus coagulans	p1738727807	GCA_018616595.1
MBT2865595.1	aminotransferase class I/II-fold pyridoxal phosphate-dependent enzyme	Staphylococcus coagulans	p1788028585	GCA_018616575.1
MBT2859146.1	aminotransferase class I/II-fold pyridoxal phosphate-dependent enzyme	Staphylococcus coagulans	p17922383	GCA_018616735.1
MBT2836133.1	aminotransferase class I/II-fold pyridoxal phosphate-dependent enzyme	Staphylococcus coagulans	p30834477	GCA_018616675.1
MBT2840661.1	aminotransferase class I/II-fold pyridoxal phosphate-dependent enzyme	Staphylococcus coagulans	p53098117	GCA_018616655.1
MBT2854892.1	aminotransferase class I/II-fold pyridoxal phosphate-dependent enzyme	Staphylococcus coagulans	p64509910	GCA_018616635.1
WP_144416450.1	aminotransferase class I/II-fold pyridoxal phosphate-dependent enzyme	Staphylococcus coagulans	SCH08	GCF_037890345.1
WP_144416450.1	aminotransferase class I/II-fold pyridoxal phosphate-dependent enzyme	Staphylococcus coagulans	SCH21	GCF_037890325.1
WP_070704423.1	aspartate aminotransferase family protein	Staphylococcus condimenti	DE0480	GCF_007667345.1
AMY05860.1	pyridoxal-dependent decarboxylase	Staphylococcus condimenti	DSM 11674	GCA_001618885.1
QQS82339.1	aspartate aminotransferase family protein	Staphylococcus condimenti	FDAARGOS_1148	GCA_016724565.1
QRP95300.1	aspartate aminotransferase family protein	Staphylococcus condimenti	FDAARGOS_1205	GCA_016889965.1
VEG62997.1	pyridoxal-deC	Staphylococcus condimenti	NCTC13827	GCA_900637235.1
RZI04570.1	aminotransferase class V-fold PLP-dependent enzyme	Staphylococcus condimenti	SA11	GCA_004209905.1
RZI03722.1	aminotransferase class V-fold PLP-dependent enzyme	Staphylococcus condimenti	SAM1	GCA_004209885.1
APR59727.1	pyridoxal-dependent decarboxylase	Staphylococcus condimenti	StO 2014-01	GCA_001922405.1
MDK8644845.1	aspartate aminotransferase family protein	Staphylococcus condimenti	UMB3102-SG298	GCA_030230025.1
WP_086428678.1	aminotransferase class V-fold PLP-dependent enzyme	Staphylococcus cornubiensis	NW1	GCF_900183575.1
AYU54119.1	aminotransferase class V-fold PLP-dependent enzyme	Staphylococcus debuckii	SDB 2975	GCA_003718735.1
XCC91006.1	aminotransferase class V-fold PLP-dependent enzyme	Staphylococcus delphini	7058	GCA_040409945.1
XCC70372.1	aminotransferase class V-fold PLP-dependent enzyme	Staphylococcus delphini	7071	GCA_040409865.1
XCC67756.1	aminotransferase class V-fold PLP-dependent enzyme	Staphylococcus delphini	7072	GCA_040409855.1
PCF32589.1	pyridoxal-dependent decarboxylase	Staphylococcus delphini	14S00091-1	GCA_002369575.1
PCF41558.1	pyridoxal-dependent decarboxylase	Staphylococcus delphini	14S02207-1	GCA_002369555.1
PCF72360.1	pyridoxal-dependent decarboxylase	Staphylococcus delphini	14S03309-1	GCA_002374115.1
PCF76476.1	pyridoxal-dependent decarboxylase	Staphylococcus delphini	14S03311-1	GCA_002374145.1
PCF77321.1	pyridoxal-dependent decarboxylase	Staphylococcus delphini	14S03313-1	GCA_002374125.1
PCF85561.1	pyridoxal-dependent decarboxylase	Staphylococcus delphini	14S03314-1	GCA_002374135.1
PCF41638.1	pyridoxal-dependent decarboxylase	Staphylococcus delphini	14S03318-1	GCA_002369645.1
PCF47773.1	pyridoxal-dependent decarboxylase	Staphylococcus delphini	14S03319-1	GCA_002369675.1
PCF52807.1	pyridoxal-dependent decarboxylase	Staphylococcus delphini	15S02591-1	GCA_002369705.1
PCF60305.1	pyridoxal-dependent decarboxylase	Staphylococcus delphini	214092305301-2	GCA_002369635.1
PCF58684.1	pyridoxal-dependent decarboxylase	Staphylococcus delphini	214092504301-1	GCA_002369615.1
PCF55704.1	pyridoxal-dependent decarboxylase	Staphylococcus delphini	215062304401-1	GCA_002369745.1
PCF55348.1	pyridoxal-dependent decarboxylase	Staphylococcus delphini	215070706401-1	GCA_002369735.1
PCF52337.1	pyridoxal-dependent decarboxylase	Staphylococcus delphini	215100905101-2	GCA_002369695.1
PCF49305.1	pyridoxal-dependent decarboxylase	Staphylococcus delphini	215102607201-2	GCA_002369585.1
QUM67126.1	aminotransferase class V-fold PLP-dependent enzyme	Staphylococcus delphini	245-1	GCA_018219245.1
QUM69569.1	aminotransferase class V-fold PLP-dependent enzyme	Staphylococcus delphini	2794-1	GCA_018219225.1
HEC2155786.1	aminotransferase class V-fold PLP-dependent enzyme	Staphylococcus delphini	4052B_S146	GCA_032800445.1
HEC2158691.1	aminotransferase class V-fold PLP-dependent enzyme	Staphylococcus delphini	7553C_S111	GCA_032800405.1
HEC2174455.1	aminotransferase class V-fold PLP-dependent enzyme	Staphylococcus delphini	9601B_S135	GCA_032800485.1
NBK47525.1	aminotransferase class V-fold PLP-dependent enzyme	Staphylococcus delphini	BCW_7426	GCA_009915005.1
RIZ53131.1	pyridoxal-dependent decarboxylase	Staphylococcus delphini	Heidy	GCA_003585325.1
UXS44548.1	aminotransferase class V-fold PLP-dependent enzyme	Staphylococcus delphini	IVB6219	GCA_025558805.1
UXS37087.1	aminotransferase class V-fold PLP-dependent enzyme	Staphylococcus delphini	IVB6220	GCA_025558785.1
UXS29434.1	aminotransferase class V-fold PLP-dependent enzyme	Staphylococcus delphini	IVB6222	GCA_025558765.1
UXV45175.1	aminotransferase class V-fold PLP-dependent enzyme	Staphylococcus delphini	IVB6226	GCA_025561565.1
VED61613.1	pyridoxal-dependent decarboxylase domain-containing protein	Staphylococcus delphini	NCTC12225	GCA_900636325.1
MTV19383.1	aminotransferase class V-fold PLP-dependent enzyme	Staphylococcus delphini	P5747	GCA_009720305.1
MTV21487.1	aminotransferase class V-fold PLP-dependent enzyme	Staphylococcus delphini	P6456	GCA_009720295.1
MDE9806655.1	aminotransferase class V-fold PLP-dependent enzyme	Staphylococcus delphini	SF_0046	GCA_029103155.1
MDE9798669.1	aminotransferase class V-fold PLP-dependent enzyme	Staphylococcus delphini	SF_0070	GCA_029103145.1
MDE9828750.1	aminotransferase class V-fold PLP-dependent enzyme	Staphylococcus delphini	SF_0126	GCA_029103125.1
MDE9795019.1	aminotransferase class V-fold PLP-dependent enzyme	Staphylococcus delphini	SF_0255	GCA_029103135.1
MDE9792360.1	aminotransferase class V-fold PLP-dependent enzyme	Staphylococcus delphini	SF_0256	GCA_029103195.1
MDE9790175.1	aminotransferase class V-fold PLP-dependent enzyme	Staphylococcus delphini	SF_0257	GCA_029103045.1
MDE9797212.1	aminotransferase class V-fold PLP-dependent enzyme	Staphylococcus delphini	SF_0258	GCA_029103065.1
MDE9753095.1	aminotransferase class V-fold PLP-dependent enzyme	Staphylococcus delphini	SF_0260	GCA_029103095.1
MBZ8174488.1	aminotransferase class V-fold PLP-dependent enzyme	Staphylococcus delphini	SP99	GCA_020144945.1
WP_019166844.1	aminotransferase class V-fold PLP-dependent enzyme	Staphylococcus delphini	8086	GCF_000308115.1
WP_002498810.1	aspartate aminotransferase family protein	Staphylococcus epidermidis	36.3	GCF_003687015.1
MDE5189070.1	aspartate aminotransferase family protein	Staphylococcus epidermidis	407	GCA_028994915.1
WP_002498810.1	aspartate aminotransferase family protein	Staphylococcus epidermidis	1057	GCF_000705055.1
MEB7397872.1	aspartate aminotransferase family protein	Staphylococcus epidermidis	3701	GCA_035791895.1
WP_002498810.1	aspartate aminotransferase family protein	Staphylococcus epidermidis	4320	GCF_030716565.1
WP_237646811.1	aspartate aminotransferase family protein	Staphylococcus epidermidis	4561	GCF_030716065.1
WP_032605060.1	aspartate aminotransferase family protein	Staphylococcus epidermidis	5459	GCF_030716025.1
WP_032602160.1	aspartate aminotransferase family protein	Staphylococcus epidermidis	7759	GCF_002271435.1
WP_032603195.1	aspartate aminotransferase family protein	Staphylococcus epidermidis	9407	GCF_030716005.1
UTP74270.1	aspartate aminotransferase family protein	Staphylococcus epidermidis	45536	GCA_024300665.1
WP_012087795.1	aspartate aminotransferase family protein	Staphylococcus epidermidis	608180	GCF_030717365.1
MDO6376071.1	aspartate aminotransferase family protein	Staphylococcus epidermidis	609797	GCA_030548645.1
WP_367997889.1	aspartate aminotransferase family protein	Staphylococcus epidermidis	620414	GCF_030548505.1
MDO6373255.1	aspartate aminotransferase family protein	Staphylococcus epidermidis	654238	GCA_030548475.1
WP_012087795.1	aspartate aminotransferase family protein	Staphylococcus epidermidis	676645	GCF_030546405.1
MCG1236650.1	aspartate aminotransferase family protein	Staphylococcus epidermidis	006P1ENG2BHI	GCA_021991445.1
MCG1157358.1	aspartate aminotransferase family protein	Staphylococcus epidermidis	009P2NS1BHI	GCA_021990705.1
MCG1132455.1	aspartate aminotransferase family protein	Staphylococcus epidermidis	009P2NS2BHI	GCA_021990275.1
MCG1226275.1	aspartate aminotransferase family protein	Staphylococcus epidermidis	010P1NS1	GCA_021991255.1
MCG1225127.1	aspartate aminotransferase family protein	Staphylococcus epidermidis	010P2BA1	GCA_021991405.1
MCG2458296.1	aspartate aminotransferase family protein	Staphylococcus epidermidis	010P2ENP1-1	GCA_022006185.1
MCG1212261.1	aspartate aminotransferase family protein	Staphylococcus epidermidis	010P2NS1	GCA_021991215.1
MCG1510591.1	aspartate aminotransferase family protein	Staphylococcus epidermidis	017P2NS001	GCA_021994995.1
MCG1416492.1	aspartate aminotransferase family protein	Staphylococcus epidermidis	019P1NS001	GCA_021993775.1
MCG1389256.1	aspartate aminotransferase family protein	Staphylococcus epidermidis	019P1SUD003	GCA_021993435.1
MCG1712085.1	aspartate aminotransferase family protein	Staphylococcus epidermidis	019P2BA001	GCA_021997695.1
MCG1340071.1	aspartate aminotransferase family protein	Staphylococcus epidermidis	019P2NS001	GCA_021992695.1
MCG1294840.1	aspartate aminotransferase family protein	Staphylococcus epidermidis	023P1ENP1-2	GCA_021992135.1
MCG1250161.1	aspartate aminotransferase family protein	Staphylococcus epidermidis	025P1NS1	GCA_021991505.1
MCG1058183.1	aspartate aminotransferase family protein	Staphylococcus epidermidis	027P1NS1-2	GCA_021989275.1
MCG1195490.1	aspartate aminotransferase family protein	Staphylococcus epidermidis	032P2ENP1-1	GCA_021990985.1
MCG1176339.1	aspartate aminotransferase family protein	Staphylococcus epidermidis	036P2SUB2	GCA_021990795.1
MCG1166043.1	aspartate aminotransferase family protein	Staphylococcus epidermidis	037P3ENP1-1	GCA_021990715.1
MCG1155531.1	aspartate aminotransferase family protein	Staphylococcus epidermidis	039P1SUB1	GCA_021990645.1
MCG1144247.1	aspartate aminotransferase family protein	Staphylococcus epidermidis	040P1BA5	GCA_021990475.1
MCG1139670.1	aspartate aminotransferase family protein	Staphylococcus epidermidis	040P1NS1	GCA_021990535.1
MCG1123658.1	aspartate aminotransferase family protein	Staphylococcus epidermidis	046P1NS1	GCA_021990165.1
MCG1128397.1	aspartate aminotransferase family protein	Staphylococcus epidermidis	047P1BA1	GCA_021990155.1
MCG1121545.1	aspartate aminotransferase family protein	Staphylococcus epidermidis	047P1NS1-1	GCA_021990095.1
MCG1673723.1	aspartate aminotransferase family protein	Staphylococcus epidermidis	047P1TS1	GCA_021996955.1
MCG1091501.1	aspartate aminotransferase family protein	Staphylococcus epidermidis	051P4ENP1-1	GCA_021989795.1
MCG2398650.1	aspartate aminotransferase family protein	Staphylococcus epidermidis	091P1ENG1-1	GCA_022005885.1
MCG2501651.1	aspartate aminotransferase family protein	Staphylococcus epidermidis	094P1ENG2-2	GCA_022006615.1
MCG1744088.1	aspartate aminotransferase family protein	Staphylococcus epidermidis	095P1NS2	GCA_021997975.1
MCG1734985.1	aspartate aminotransferase family protein	Staphylococcus epidermidis	095P2NS4	GCA_021997875.1
MCG1842358.1	aspartate aminotransferase family protein	Staphylococcus epidermidis	099P1NS1	GCA_021999915.1
MCG1904885.1	aspartate aminotransferase family protein	Staphylococcus epidermidis	101P1SUD1	GCA_021999475.1
WP_012087795.1	aspartate aminotransferase family protein	Staphylococcus epidermidis	1023_SEPI	GCF_001068495.1
WP_012087795.1	aspartate aminotransferase family protein	Staphylococcus epidermidis	1024_SEPI	GCF_001069955.1
WP_012087795.1	aspartate aminotransferase family protein	Staphylococcus epidermidis	1026_SEPI	GCF_001068505.1
WP_012087795.1	aspartate aminotransferase family protein	Staphylococcus epidermidis	1063_SEPI	GCF_001070075.1
WP_032605060.1	aspartate aminotransferase family protein	Staphylococcus epidermidis	1129_SEPI	GCF_001070255.1
WP_032605060.1	aspartate aminotransferase family protein	Staphylococcus epidermidis	1130_SEPI	GCF_001069215.1
WP_049386152.1	aspartate aminotransferase family protein	Staphylococcus epidermidis	114_SEPI	GCF_001068755.1
MCG1796935.1	aspartate aminotransferase family protein	Staphylococcus epidermidis	114P1BA1	GCA_021998825.1
MCG1818744.1	aspartate aminotransferase family protein	Staphylococcus epidermidis	115P1BA1	GCA_021999115.1
MCG1304767.1	aspartate aminotransferase family protein	Staphylococcus epidermidis	115P2NS11	GCA_021992235.1
MCG1295238.1	aspartate aminotransferase family protein	Staphylococcus epidermidis	117P1NS1	GCA_021992195.1
WP_002498810.1	aspartate aminotransferase family protein	Staphylococcus epidermidis	1190_SEPI	GCF_001069395.1
MCG2499225.1	aspartate aminotransferase family protein	Staphylococcus epidermidis	121P1NS1	GCA_022006555.1
WP_032605060.1	aspartate aminotransferase family protein	Staphylococcus epidermidis	1226_SEPI	GCF_001068845.1
MCG2469875.1	aspartate aminotransferase family protein	Staphylococcus epidermidis	122P1NS1	GCA_022006095.1
WP_002494529.1	aspartate aminotransferase family protein	Staphylococcus epidermidis	1284_SEPI	GCF_001070415.1
MCG1949469.1	aspartate aminotransferase family protein	Staphylococcus epidermidis	12P1NS2	GCA_021999795.1
WP_002498810.1	aspartate aminotransferase family protein	Staphylococcus epidermidis	1337_SEPI	GCF_001076235.1
WP_032604866.1	aspartate aminotransferase family protein	Staphylococcus epidermidis	1340_SEPI	GCF_001070565.1
WP_032602160.1	aspartate aminotransferase family protein	Staphylococcus epidermidis	14-1779 M5	GCF_006151885.1
MBC3057846.1	aspartate aminotransferase family protein	Staphylococcus epidermidis	151250001-1-258-40	GCA_014266035.1
MBC2924826.1	aspartate aminotransferase family protein	Staphylococcus epidermidis	151250001-1-258-40-RA	GCA_014265305.1
MBC3034714.1	aspartate aminotransferase family protein	Staphylococcus epidermidis	151250001-2-258-41	GCA_014265865.1
MBC2967636.1	aspartate aminotransferase family protein	Staphylococcus epidermidis	151250001-3-258-42	GCA_014265845.1
MBC2988206.1	aspartate aminotransferase family protein	Staphylococcus epidermidis	151250001-3-258-42-RA	GCA_014265185.1
MBC2971317.1	aspartate aminotransferase family protein	Staphylococcus epidermidis	151250003-1-258-43	GCA_014265825.1
MBC2928569.1	aspartate aminotransferase family protein	Staphylococcus epidermidis	151250017-1-258-58-RA	GCA_014265225.1
MBC2996650.1	aspartate aminotransferase family protein	Staphylococcus epidermidis	151250017-2-258-59	GCA_014265645.1
MBC3003355.1	aspartate aminotransferase family protein	Staphylococcus epidermidis	151250017-2-258-59-RA	GCA_014265235.1
WP_002498810.1	aspartate aminotransferase family protein	Staphylococcus epidermidis	158_SEPI	GCF_001070675.1
WP_002498810.1	aspartate aminotransferase family protein	Staphylococcus epidermidis	160_SEPI	GCF_001071485.1
WP_032602160.1	aspartate aminotransferase family protein	Staphylococcus epidermidis	16FSE04	GCF_030238065.1
WP_002498810.1	aspartate aminotransferase family protein	Staphylococcus epidermidis	178_SEPI	GCF_001071635.1
WP_002498810.1	aspartate aminotransferase family protein	Staphylococcus epidermidis	18_SEPI	GCF_001070735.1
WP_032603195.1	aspartate aminotransferase family protein	Staphylococcus epidermidis	1DSE05	GCF_029691745.1
WP_049386152.1	aspartate aminotransferase family protein	Staphylococcus epidermidis	1H8	GCF_018408135.1
WP_032605060.1	aspartate aminotransferase family protein	Staphylococcus epidermidis	1I24	GCF_018407685.1
WP_049386152.1	aspartate aminotransferase family protein	Staphylococcus epidermidis	1I7	GCF_018407885.1
AXB89355.1	pyridoxal-deC	Staphylococcus epidermidis	200OR2
MCG2119189.1	aspartate aminotransferase family protein	Staphylococcus epidermidis	20BS14-1	GCA_022003575.1
MCG2171067.1	aspartate aminotransferase family protein	Staphylococcus epidermidis	20BS4-1	GCA_022003515.1
MCG2195771.1	aspartate aminotransferase family protein	Staphylococcus epidermidis	20CH1-1	GCA_022003815.1
WP_032603195.1	aspartate aminotransferase family protein	Staphylococcus epidermidis	20DL	GCF_029691915.1
MCG2158379.1	aspartate aminotransferase family protein	Staphylococcus epidermidis	20KH18-1	GCA_022003395.1
MCG2311333.1	aspartate aminotransferase family protein	Staphylococcus epidermidis	20MB26-3	GCA_022003375.1
MCG2220814.1	aspartate aminotransferase family protein	Staphylococcus epidermidis	20MC5-1	GCA_022004585.1
MCG2288525.1	aspartate aminotransferase family protein	Staphylococcus epidermidis	20MH25-3	GCA_022003115.1
MCG2275005.1	aspartate aminotransferase family protein	Staphylococcus epidermidis	20MZ27-1	GCA_022002935.1
MCG2270340.1	aspartate aminotransferase family protein	Staphylococcus epidermidis	20MZ31-3	GCA_022002955.1
MCG2349090.1	aspartate aminotransferase family protein	Staphylococcus epidermidis	20PN247-2	GCA_022004985.1
MCG2344426.1	aspartate aminotransferase family protein	Staphylococcus epidermidis	20PN248-1	GCA_022004945.1
MCG2348874.1	aspartate aminotransferase family protein	Staphylococcus epidermidis	20PN265-4	GCA_022004935.1
MCG2336670.1	aspartate aminotransferase family protein	Staphylococcus epidermidis	20PN308-3	GCA_022004895.1
MCG2330126.1	aspartate aminotransferase family protein	Staphylococcus epidermidis	20PN604-3	GCA_022004755.1
MCG2335628.1	aspartate aminotransferase family protein	Staphylococcus epidermidis	20PN653-3	GCA_022004675.1
MCG2322462.1	aspartate aminotransferase family protein	Staphylococcus epidermidis	20PN654-3	GCA_022004595.1
MCG2327159.1	aspartate aminotransferase family protein	Staphylococcus epidermidis	20PN702-1	GCA_022004695.1
MCG2340567.1	aspartate aminotransferase family protein	Staphylococcus epidermidis	20PN896-2	GCA_022004855.1
MCG2317959.1	aspartate aminotransferase family protein	Staphylococcus epidermidis	20PN923-2	GCA_022004715.1
MCG2346557.1	aspartate aminotransferase family protein	Staphylococcus epidermidis	20PN972-1	GCA_022004905.1
MCG1972613.1	aspartate aminotransferase family protein	Staphylococcus epidermidis	20QD4-2	GCA_022001035.1
MCG2235434.1	aspartate aminotransferase family protein	Staphylococcus epidermidis	20SD16-2	GCA_022004475.1
MCG2098858.1	aspartate aminotransferase family protein	Staphylococcus epidermidis	20SD49-2	GCA_022002755.1
MCG2094089.1	aspartate aminotransferase family protein	Staphylococcus epidermidis	20SD55-1	GCA_022002635.1
MCG2200369.1	aspartate aminotransferase family protein	Staphylococcus epidermidis	20ST5-1	GCA_022003785.1
MCG2073961.1	aspartate aminotransferase family protein	Staphylococcus epidermidis	20TMH118-1	GCA_022002375.1
MCG2068304.1	aspartate aminotransferase family protein	Staphylococcus epidermidis	20TMH21-1	GCA_022002175.1
MCG2247563.1	aspartate aminotransferase family protein	Staphylococcus epidermidis	20TMH45-1	GCA_022004305.1
MCG2245615.1	aspartate aminotransferase family protein	Staphylococcus epidermidis	20TMH97-2	GCA_022004125.1
MCG2022122.1	aspartate aminotransferase family protein	Staphylococcus epidermidis	20ZF1-1	GCA_022001735.1
MCG1871516.1	aspartate aminotransferase family protein	Staphylococcus epidermidis	20ZF5-2	GCA_022000755.1
WP_049386152.1	aspartate aminotransferase family protein	Staphylococcus epidermidis	2-13D	GCF_039547135.1
WP_002498810.1	aspartate aminotransferase family protein	Staphylococcus epidermidis	21FSE01	GCF_029691835.1
WP_032605060.1	aspartate aminotransferase family protein	Staphylococcus epidermidis	2-29C	GCF_039547835.1
WP_032605060.1	aspartate aminotransferase family protein	Staphylococcus epidermidis	2-40C	GCF_039547755.1
WP_002498810.1	aspartate aminotransferase family protein	Staphylococcus epidermidis	25DSE01	GCF_029457615.1
WP_002498810.1	aspartate aminotransferase family protein	Staphylococcus epidermidis	25DSE06	GCF_030235025.1
WP_049386152.1	aspartate aminotransferase family protein	Staphylococcus epidermidis	2-5F	GCF_039547195.1
WP_032603195.1	aspartate aminotransferase family protein	Staphylococcus epidermidis	295_SEPI	GCF_001076655.1
WP_032603195.1	aspartate aminotransferase family protein	Staphylococcus epidermidis	312_SEPI	GCF_001072235.1
AXB89476.1	pyridoxal-deC	Staphylococcus epidermidis	32BR
WP_161375242.1	aspartate aminotransferase family protein	Staphylococcus epidermidis	32FSE01	GCF_030234985.1
WP_032603195.1	aspartate aminotransferase family protein	Staphylococcus epidermidis	32FSE06	GCF_029457595.1
WP_161375242.1	aspartate aminotransferase family protein	Staphylococcus epidermidis	32FSE07	GCF_029691775.1
EON84887.1	hypothetical protein	Staphylococcus epidermidis	36-1	GCA_000390405.1
WP_032605060.1	aspartate aminotransferase family protein	Staphylococcus epidermidis	365_SEPI	GCF_001072575.1
WP_032605060.1	aspartate aminotransferase family protein	Staphylococcus epidermidis	384_SEPI	GCF_001072685.1
WP_032605060.1	aspartate aminotransferase family protein	Staphylococcus epidermidis	393_SEPI	GCF_001072715.1
WP_002498810.1	aspartate aminotransferase family protein	Staphylococcus epidermidis	407_SEPI	GCF_001072795.1
WP_032603195.1	aspartate aminotransferase family protein	Staphylococcus epidermidis	40DSE01	GCF_031082805.1
WP_032603195.1	aspartate aminotransferase family protein	Staphylococcus epidermidis	44DSE01	GCF_029691725.1
MCG1231362.1	aspartate aminotransferase family protein	Staphylococcus epidermidis	44P3ENG2-1	GCA_021991335.1
WP_032605060.1	aspartate aminotransferase family protein	Staphylococcus epidermidis	450_SEPI	GCF_001071125.1
WP_032605060.1	aspartate aminotransferase family protein	Staphylococcus epidermidis	458_SEPI	GCF_001073035.1
WP_032605060.1	aspartate aminotransferase family protein	Staphylococcus epidermidis	460_SEPI	GCF_001073075.1
WP_032603195.1	aspartate aminotransferase family protein	Staphylococcus epidermidis	47FSE01	GCF_029691795.1
UJF06570.1	aspartate aminotransferase family protein	Staphylococcus epidermidis	50D	GCA_021513075.1
WP_032605060.1	aspartate aminotransferase family protein	Staphylococcus epidermidis	529_SEPI	GCF_001073235.1
UJF04433.1	aspartate aminotransferase family protein	Staphylococcus epidermidis	52B	GCA_021513055.1
WP_032605060.1	aspartate aminotransferase family protein	Staphylococcus epidermidis	535_SEPI	GCF_001073305.1
WP_032605060.1	aspartate aminotransferase family protein	Staphylococcus epidermidis	551_SEPI	GCF_001073295.1
WP_002498810.1	aspartate aminotransferase family protein	Staphylococcus epidermidis	563_SEPI	GCF_001073395.1
MCG1560223.1	aspartate aminotransferase family protein	Staphylococcus epidermidis	56P1SUB1	GCA_021996455.1
MCG2410099.1	aspartate aminotransferase family protein	Staphylococcus epidermidis	57P1SUD2	GCA_022005895.1
WP_032605060.1	aspartate aminotransferase family protein	Staphylococcus epidermidis	585_SEPI	GCF_001073465.1
WP_002498810.1	aspartate aminotransferase family protein	Staphylococcus epidermidis	59_SEPI	GCF_001073485.1
WP_032602160.1	aspartate aminotransferase family protein	Staphylococcus epidermidis	590_SEPI	GCF_001071395.1
WP_032605060.1	aspartate aminotransferase family protein	Staphylococcus epidermidis	596_SEPI	GCF_001071415.1
WP_032602160.1	aspartate aminotransferase family protein	Staphylococcus epidermidis	597_SEPI	GCF_001073515.1
MCG1598231.1	aspartate aminotransferase family protein	Staphylococcus epidermidis	60P1BA3	GCA_021995655.1
MCG1625521.1	aspartate aminotransferase family protein	Staphylococcus epidermidis	60P1NS1	GCA_021995635.1
MCG1609637.1	aspartate aminotransferase family protein	Staphylococcus epidermidis	60P1TS1	GCA_021995505.1
MCG1545102.1	aspartate aminotransferase family protein	Staphylococcus epidermidis	66P1SUE1	GCA_021995375.1
WP_002498810.1	aspartate aminotransferase family protein	Staphylococcus epidermidis	678_SEPI	GCF_001073895.1
MCG1646992.1	aspartate aminotransferase family protein	Staphylococcus epidermidis	67P1SUA2	GCA_021996805.1
MCG1646409.1	aspartate aminotransferase family protein	Staphylococcus epidermidis	67P1TS1-2	GCA_021996635.1
MCG1443798.1	aspartate aminotransferase family protein	Staphylococcus epidermidis	68P1FS1	GCA_021994055.1
WP_278276813.1	aspartate aminotransferase family protein	Staphylococcus epidermidis	6DSE07	GCF_029691855.1
WP_032605060.1	aspartate aminotransferase family protein	Staphylococcus epidermidis	767_SEPI	GCF_001074315.1
MCG1911321.1	aspartate aminotransferase family protein	Staphylococcus epidermidis	77P1NS1	GCA_022000055.1
WP_049386152.1	aspartate aminotransferase family protein	Staphylococcus epidermidis	785_SEPI	GCF_001075025.1
MCE5158565.1	aspartate aminotransferase family protein	Staphylococcus epidermidis	7937-1	GCA_021367815.1
WP_032605060.1	aspartate aminotransferase family protein	Staphylococcus epidermidis	799_SEPI	GCF_001075065.1
WP_032605060.1	aspartate aminotransferase family protein	Staphylococcus epidermidis	801_SEPI	GCF_001074495.1
WP_032602160.1	aspartate aminotransferase family protein	Staphylococcus epidermidis	818_SEPI	GCF_001075095.1
WP_032604866.1	aspartate aminotransferase family protein	Staphylococcus epidermidis	838_SEPI	GCF_001074555.1
WP_032605060.1	aspartate aminotransferase family protein	Staphylococcus epidermidis	87_SEPI	GCF_001074715.1
MCG1251717.1	aspartate aminotransferase family protein	Staphylococcus epidermidis	87P1ENG1-1	GCA_021991475.1
WP_032602160.1	aspartate aminotransferase family protein	Staphylococcus epidermidis	927c	GCF_905397425.1
WP_002498810.1	aspartate aminotransferase family protein	Staphylococcus epidermidis	939_SEPI	GCF_001075955.1
WP_032605060.1	aspartate aminotransferase family protein	Staphylococcus epidermidis	968_SHAE	GCF_001075855.1
WP_032604866.1	aspartate aminotransferase family protein	Staphylococcus epidermidis	972_SEPI	GCF_001075525.1
WP_002498810.1	aspartate aminotransferase family protein	Staphylococcus epidermidis	973_SEPI	GCF_001076005.1
MCF7587755.1	aspartate aminotransferase family protein	Staphylococcus epidermidis	9SP	GCA_021728835.1
WP_032603195.1	aspartate aminotransferase family protein	Staphylococcus epidermidis	A25	GCF_029594215.1
MDH9847222.1	aspartate aminotransferase family protein	Staphylococcus epidermidis	AACOK	GCA_029928055.1
MCG7826582.1	aspartate aminotransferase family protein	Staphylococcus epidermidis	ABKVC	GCA_022352845.1
MCG7793501.1	aspartate aminotransferase family protein	Staphylococcus epidermidis	ABKVD	GCA_022352705.1
MCG7787006.1	aspartate aminotransferase family protein	Staphylococcus epidermidis	ABKVI	GCA_022352855.1
MCH1562147.1	aspartate aminotransferase family protein	Staphylococcus epidermidis	ABKVP	GCA_022426545.1
OXE76183.1	pyridoxal-dependent decarboxylase	Staphylococcus epidermidis	ABKWQ	GCA_002221945.1
MCH1577159.1	aspartate aminotransferase family protein	Staphylococcus epidermidis	ABKWY	GCA_022428355.1
WP_012087795.1	aspartate aminotransferase family protein	Staphylococcus epidermidis	ABKWZ	GCF_022428305.1
MDH9926212.1	aspartate aminotransferase family protein	Staphylococcus epidermidis	ACVDL	GCA_029927145.1
MDH9992530.1	aspartate aminotransferase family protein	Staphylococcus epidermidis	ACVDM	GCA_029928835.1
MDH9914440.1	aspartate aminotransferase family protein	Staphylococcus epidermidis	ACVDN	GCA_029927105.1
MDH9778383.1	aspartate aminotransferase family protein	Staphylococcus epidermidis	ACVDO	GCA_029927115.1
MDH9711644.1	aspartate aminotransferase family protein	Staphylococcus epidermidis	ACVDY	GCA_029925785.1
MDH9918168.1	aspartate aminotransferase family protein	Staphylococcus epidermidis	ACVEA	GCA_029927065.1
MDH9936443.1	aspartate aminotransferase family protein	Staphylococcus epidermidis	ACVEC	GCA_029927025.1
MDH9931841.1	aspartate aminotransferase family protein	Staphylococcus epidermidis	ACVEF	GCA_029926965.1
MDH8804068.1	aspartate aminotransferase family protein	Staphylococcus epidermidis	ADPUO	GCA_029918885.1
MDH8783241.1	aspartate aminotransferase family protein	Staphylococcus epidermidis	ADPXB	GCA_029917675.1
MDH8980539.1	aspartate aminotransferase family protein	Staphylococcus epidermidis	ADPXR	GCA_029917385.1
MDH8977947.1	aspartate aminotransferase family protein	Staphylococcus epidermidis	ADPXS	GCA_029917335.1
MDH8987381.1	aspartate aminotransferase family protein	Staphylococcus epidermidis	ADPXT	GCA_029921505.1
MDH9004035.1	aspartate aminotransferase family protein	Staphylococcus epidermidis	ADPXU	GCA_029921565.1
MDH9029679.1	aspartate aminotransferase family protein	Staphylococcus epidermidis	ADPXV	GCA_029921515.1
MDH9010980.1	aspartate aminotransferase family protein	Staphylococcus epidermidis	ADPXW	GCA_029921485.1
MDH9013298.1	aspartate aminotransferase family protein	Staphylococcus epidermidis	ADPXX	GCA_029921465.1
MDH8992559.1	aspartate aminotransferase family protein	Staphylococcus epidermidis	ADPXY	GCA_029921405.1
MDH8994868.1	aspartate aminotransferase family protein	Staphylococcus epidermidis	ADPXZ	GCA_029921415.1
MDH9031815.1	aspartate aminotransferase family protein	Staphylococcus epidermidis	ADPYA	GCA_029921425.1
MDH9017888.1	aspartate aminotransferase family protein	Staphylococcus epidermidis	ADPYB	GCA_029921385.1
MDH9026111.1	aspartate aminotransferase family protein	Staphylococcus epidermidis	ADPYC	GCA_029921365.1
MDH8996790.1	aspartate aminotransferase family protein	Staphylococcus epidermidis	ADPYD	GCA_029921335.1
MDH9001556.1	aspartate aminotransferase family protein	Staphylococcus epidermidis	ADPYE	GCA_029921325.1
MDH9036364.1	aspartate aminotransferase family protein	Staphylococcus epidermidis	ADPYF	GCA_029921305.1
MDH9054989.1	aspartate aminotransferase family protein	Staphylococcus epidermidis	ADPYG	GCA_029921285.1
MDH9080092.1	aspartate aminotransferase family protein	Staphylococcus epidermidis	ADPYH	GCA_029921215.1
MDH9057412.1	aspartate aminotransferase family protein	Staphylococcus epidermidis	ADPYI	GCA_029921265.1
MDH8999420.1	aspartate aminotransferase family protein	Staphylococcus epidermidis	ADPYJ	GCA_029921205.1
MDH9038991.1	aspartate aminotransferase family protein	Staphylococcus epidermidis	ADPYK	GCA_029921185.1
MDH9015284.1	aspartate aminotransferase family protein	Staphylococcus epidermidis	ADPYT	GCA_029920995.1
MDH9675433.1	aspartate aminotransferase family protein	Staphylococcus epidermidis	ADPYU	GCA_029924785.1
MDH8936005.1	aspartate aminotransferase family protein	Staphylococcus epidermidis	ADPYV	GCA_029917305.1
MDH8938475.1	aspartate aminotransferase family protein	Staphylococcus epidermidis	ADPYW	GCA_029917235.1
MDH9635275.1	aspartate aminotransferase family protein	Staphylococcus epidermidis	ADPYX	GCA_029924825.1
MDH8927427.1	aspartate aminotransferase family protein	Staphylococcus epidermidis	ADPYY	GCA_029917245.1
MDH8956190.1	aspartate aminotransferase family protein	Staphylococcus epidermidis	ADPYZ	GCA_029917265.1
MDH8974789.1	aspartate aminotransferase family protein	Staphylococcus epidermidis	ADPZA	GCA_029917225.1
MDH8977122.1	aspartate aminotransferase family protein	Staphylococcus epidermidis	ADPZB	GCA_029917125.1
MDH8949950.1	aspartate aminotransferase family protein	Staphylococcus epidermidis	ADPZC	GCA_029917185.1
MDH8952602.1	aspartate aminotransferase family protein	Staphylococcus epidermidis	ADPZD	GCA_029917145.1
MDH9650508.1	aspartate aminotransferase family protein	Staphylococcus epidermidis	ADPZE	GCA_029924765.1
MDH8959623.1	aspartate aminotransferase family protein	Staphylococcus epidermidis	ADPZF	GCA_029917155.1
MDH8957128.1	aspartate aminotransferase family protein	Staphylococcus epidermidis	ADPZG	GCA_029917195.1
MDH8982519.1	aspartate aminotransferase family protein	Staphylococcus epidermidis	ADPZH	GCA_029920985.1
MDH8984987.1	aspartate aminotransferase family protein	Staphylococcus epidermidis	ADPZI	GCA_029921035.1
MDH9089629.1	aspartate aminotransferase family protein	Staphylococcus epidermidis	ADPZJ	GCA_029921005.1
MDH9092059.1	aspartate aminotransferase family protein	Staphylococcus epidermidis	ADPZK	GCA_029920965.1
MDH9207340.1	aspartate aminotransferase family protein	Staphylococcus epidermidis	ADPZL	GCA_029920945.1
MDH9094726.1	aspartate aminotransferase family protein	Staphylococcus epidermidis	ADPZM	GCA_029920885.1
MDH9059935.1	aspartate aminotransferase family protein	Staphylococcus epidermidis	ADQAF	GCA_029920545.1
MDH9186627.1	aspartate aminotransferase family protein	Staphylococcus epidermidis	ADQAI	GCA_029920435.1
MDH9148654.1	aspartate aminotransferase family protein	Staphylococcus epidermidis	ADQDC	GCA_029919785.1
MDH9168880.1	aspartate aminotransferase family protein	Staphylococcus epidermidis	ADQDD	GCA_029919745.1
MDH9134964.1	aspartate aminotransferase family protein	Staphylococcus epidermidis	ADQDE	GCA_029919705.1
MDH9238041.1	aspartate aminotransferase family protein	Staphylococcus epidermidis	ADQEA	GCA_029921585.1
MDH9249358.1	aspartate aminotransferase family protein	Staphylococcus epidermidis	ADQEF	GCA_029924035.1
MDH9454101.1	aspartate aminotransferase family protein	Staphylococcus epidermidis	ADTSE	GCA_029922395.1
MDH9413851.1	aspartate aminotransferase family protein	Staphylococcus epidermidis	ADTSF	GCA_029922385.1
MDH9449557.1	aspartate aminotransferase family protein	Staphylococcus epidermidis	ADTSJ	GCA_029922245.1
MDH9530613.1	aspartate aminotransferase family protein	Staphylococcus epidermidis	ADTSP	GCA_029924725.1
MDH9433979.1	aspartate aminotransferase family protein	Staphylococcus epidermidis	ADTSQ	GCA_029922165.1
MDH9424989.1	aspartate aminotransferase family protein	Staphylococcus epidermidis	ADTSR	GCA_029922155.1
MDH9472537.1	aspartate aminotransferase family protein	Staphylococcus epidermidis	ADTST	GCA_029922145.1
OAW56457.1	pyridoxal-dependent decarboxylase	Staphylococcus epidermidis	Ae-e06	GCA_001658895.1
UYB67794.1	aspartate aminotransferase family protein	Staphylococcus epidermidis	AH6072	GCA_025665415.1
OAW54980.1	pyridoxal-dependent decarboxylase	Staphylococcus epidermidis	ALKB06	GCA_001658885.1
WP_032605060.1	aspartate aminotransferase family protein	Staphylococcus epidermidis	AM104-94	GCF_027658865.1
MCD9069041.1	aspartate aminotransferase family protein	Staphylococcus epidermidis	AM346	GCA_021191175.1
MCE5081003.1	aspartate aminotransferase family protein	Staphylococcus epidermidis	Ani-LG-005	GCA_021367235.1
MCE5030260.1	aspartate aminotransferase family protein	Staphylococcus epidermidis	Ani-LG-055	GCA_021366885.1
MCE5032545.1	aspartate aminotransferase family protein	Staphylococcus epidermidis	Ani-LG-060	GCA_021366835.1
MCE5044834.1	aspartate aminotransferase family protein	Staphylococcus epidermidis	Ani-LG-106	GCA_021366715.1
NAN88934.1	aminotransferase class V-fold PLP-dependent enzyme	Staphylococcus epidermidis	APC 3764	GCA_009897905.1
WP_002498810.1	aspartate aminotransferase family protein	Staphylococcus epidermidis	APC 3771	GCF_009898055.1
WP_032602160.1	aspartate aminotransferase family protein	Staphylococcus epidermidis	APC 3780	GCF_009897515.1
NAM98537.1	aminotransferase class V-fold PLP-dependent enzyme	Staphylococcus epidermidis	APC 3781	GCA_009897235.1
WP_161375242.1	aspartate aminotransferase family protein	Staphylococcus epidermidis	APC 3782	GCF_009896965.1
WP_012087795.1	aspartate aminotransferase family protein	Staphylococcus epidermidis	APC 3784	GCF_009896875.1
NAN11088.1	aminotransferase class V-fold PLP-dependent enzyme	Staphylococcus epidermidis	APC 3788	GCA_009897375.1
NAN28378.1	aminotransferase class V-fold PLP-dependent enzyme	Staphylococcus epidermidis	APC 3789	GCA_009897435.1
WP_002498810.1	aspartate aminotransferase family protein	Staphylococcus epidermidis	APC 3799	GCF_009897125.1
WP_002498810.1	aspartate aminotransferase family protein	Staphylococcus epidermidis	APC 3800	GCF_009897075.1
WP_161375242.1	aspartate aminotransferase family protein	Staphylococcus epidermidis	APC 3801	GCF_009897085.1
WP_002498810.1	aspartate aminotransferase family protein	Staphylococcus epidermidis	APC 3803	GCF_009897035.1
WP_161375242.1	aspartate aminotransferase family protein	Staphylococcus epidermidis	APC 3804	GCF_009897025.1
WP_161375242.1	aspartate aminotransferase family protein	Staphylococcus epidermidis	APC 3806	GCF_009896975.1
NAM13857.1	aminotransferase class V-fold PLP-dependent enzyme	Staphylococcus epidermidis	APC 3807	GCA_009896915.1
WMW71467.1	aspartate aminotransferase family protein	Staphylococcus epidermidis	AR4072	GCA_031326165.1
WP_002498810.1	aspartate aminotransferase family protein	Staphylococcus epidermidis	ATCC 12228	GCF_009873455.1
KTF26356.1	pyridoxal-dependent decarboxylase	Staphylococcus epidermidis	AU21	GCA_001469325.1
KTF24077.1	pyridoxal-dependent decarboxylase	Staphylococcus epidermidis	AU23	GCA_001469315.1
KSU47415.1	pyridoxal-dependent decarboxylase	Staphylococcus epidermidis	AU24	GCA_001457235.1
UIK41741.1	aspartate aminotransferase family protein	Staphylococcus epidermidis	AZ22	GCA_021398345.1
WP_049386152.1	aspartate aminotransferase family protein	Staphylococcus epidermidis	B1	GCF_041021055.1
OAW79201.1	pyridoxal-dependent decarboxylase	Staphylococcus epidermidis	B10873	GCA_001659125.1
WP_252920271.1	aspartate aminotransferase family protein	Staphylococcus epidermidis	B12	GCF_041020865.1
QXV55518.1	aspartate aminotransferase family protein	Staphylococcus epidermidis	B1200343	GCA_019329325.1
QXV53015.1	aspartate aminotransferase family protein	Staphylococcus epidermidis	B1200599	GCA_019329245.1
QXV49881.1	aspartate aminotransferase family protein	Staphylococcus epidermidis	B1208538	GCA_019329365.1
OAW76307.1	pyridoxal-dependent decarboxylase	Staphylococcus epidermidis	B12142	GCA_001659145.1
QXV46282.1	aspartate aminotransferase family protein	Staphylococcus epidermidis	B1220165	GCA_019329405.1
QXV43731.1	aspartate aminotransferase family protein	Staphylococcus epidermidis	B1230143	GCA_019329425.1
QXV40988.1	aspartate aminotransferase family protein	Staphylococcus epidermidis	B1262351	GCA_019329505.1
QXV38514.1	aspartate aminotransferase family protein	Staphylococcus epidermidis	B1264454	GCA_019329525.1
QXV35986.1	aspartate aminotransferase family protein	Staphylococcus epidermidis	B1264787	GCA_019329545.1
QXV34842.1	aspartate aminotransferase family protein	Staphylococcus epidermidis	B1265603	GCA_019329565.1
QXV31172.1	aspartate aminotransferase family protein	Staphylococcus epidermidis	B1266875	GCA_019329585.1
QXV28163.1	aspartate aminotransferase family protein	Staphylococcus epidermidis	B1266911	GCA_019329605.1
QXV22923.1	aspartate aminotransferase family protein	Staphylococcus epidermidis	B1269488	GCA_019329645.1
QXV20367.1	aspartate aminotransferase family protein	Staphylococcus epidermidis	B1272014	GCA_019329665.1
QXV17792.1	aspartate aminotransferase family protein	Staphylococcus epidermidis	B1275857	GCA_019329685.1
QXV16411.1	aspartate aminotransferase family protein	Staphylococcus epidermidis	B1276219	GCA_019329705.1
QXV12812.1	aspartate aminotransferase family protein	Staphylococcus epidermidis	B1276296	GCA_019329725.1
QXV09127.1	aspartate aminotransferase family protein	Staphylococcus epidermidis	B1276912	GCA_019329745.1
QXV06542.1	aspartate aminotransferase family protein	Staphylococcus epidermidis	B1279591	GCA_019329765.1
QXV04034.1	aspartate aminotransferase family protein	Staphylococcus epidermidis	B1282731	GCA_019329785.1
QXV01540.1	aspartate aminotransferase family protein	Staphylococcus epidermidis	B1285135	GCA_019329805.1
QXV01354.1	aspartate aminotransferase family protein	Staphylococcus epidermidis	B1285228	GCA_019787665.1
QXU98933.1	aspartate aminotransferase family protein	Staphylococcus epidermidis	B1286247	GCA_019330045.1
QXU96393.1	aspartate aminotransferase family protein	Staphylococcus epidermidis	B1287175	GCA_019330105.1
OAW80500.1	pyridoxal-dependent decarboxylase	Staphylococcus epidermidis	B12916	GCA_001659165.1
OAW91141.1	pyridoxal-dependent decarboxylase	Staphylococcus epidermidis	B13587	GCA_001659205.1
OAW86263.1	pyridoxal-dependent decarboxylase	Staphylococcus epidermidis	B16261	GCA_001659025.1
OAW69093.1	pyridoxal-dependent decarboxylase	Staphylococcus epidermidis	B2461	GCA_001658995.1
OAW68412.1	pyridoxal-dependent decarboxylase	Staphylococcus epidermidis	B2731	GCA_001659075.1
OAW65175.1	pyridoxal-dependent decarboxylase	Staphylococcus epidermidis	B59	GCA_001659065.1
OAW64999.1	pyridoxal-dependent decarboxylase	Staphylococcus epidermidis	B647	GCA_001659045.1
OAW73784.1	pyridoxal-dependent decarboxylase	Staphylococcus epidermidis	B7234	GCA_001659105.1
WP_002498810.1	aspartate aminotransferase family protein	Staphylococcus epidermidis	BB403169X	GCF_008923145.1
WP_002498810.1	aspartate aminotransferase family protein	Staphylococcus epidermidis	BB412943Y	GCF_008922995.1
WP_002498810.1	aspartate aminotransferase family protein	Staphylococcus epidermidis	BB413483J	GCF_008922955.1
WP_161375242.1	aspartate aminotransferase family protein	Staphylococcus epidermidis	BB417762B	GCF_008922945.1
KAB2271062.1	aspartate aminotransferase family protein	Staphylococcus epidermidis	BB424987J	GCF_008922845.1
WP_032602160.1	aspartate aminotransferase family protein	Staphylococcus epidermidis	BB431437E	GCF_008922785.1
KAB2259623.1	aspartate aminotransferase family protein	Staphylococcus epidermidis	BB436246W	GCF_008922755.1
KAB2248712.1	aspartate aminotransferase family protein	Staphylococcus epidermidis	BB442838N	GCF_008922565.1
KAB2251016.1	aspartate aminotransferase family protein	Staphylococcus epidermidis	BB443408J	GCF_008922555.1
UJF13420.1	aspartate aminotransferase family protein	Staphylococcus epidermidis	BC1190	GCA_021513115.1
WP_002498810.1	aspartate aminotransferase family protein	Staphylococcus epidermidis	BE_04_1_SE	GCF_027889805.1
WP_032603195.1	aspartate aminotransferase family protein	Staphylococcus epidermidis	BE_08_1_SE	GCF_027889845.1
MCG1716577.1	aspartate aminotransferase family protein	Staphylococcus epidermidis	BSEP14	GCA_021997545.1
MCG1703011.1	aspartate aminotransferase family protein	Staphylococcus epidermidis	BSEP15	GCA_021997535.1
MCG1681815.1	aspartate aminotransferase family protein	Staphylococcus epidermidis	BSEP2	GCA_021997435.1
MCG1691589.1	aspartate aminotransferase family protein	Staphylococcus epidermidis	BSEP20	GCA_021997415.1
MCG1660043.1	aspartate aminotransferase family protein	Staphylococcus epidermidis	BSEP8	GCA_021997145.1
WP_002498810.1	aspartate aminotransferase family protein	Staphylococcus epidermidis	bTMA-013	GCF_002835575.1
UOH70433.1	aspartate aminotransferase family protein	Staphylococcus epidermidis	C100	GCA_022832915.1
UOH70391.1	aspartate aminotransferase family protein	Staphylococcus epidermidis	C100	GCA_022832915.1
UOH72696.1	aspartate aminotransferase family protein	Staphylococcus epidermidis	C101	GCA_022832935.1
MCG1410791.1	aspartate aminotransferase family protein	Staphylococcus epidermidis	C104FS2	GCA_021993745.1
MCG1413152.1	aspartate aminotransferase family protein	Staphylococcus epidermidis	C104NS1	GCA_021993655.1
MCG1406164.1	aspartate aminotransferase family protein	Staphylococcus epidermidis	C104RBA1	GCA_021993715.1
MCG1424728.1	aspartate aminotransferase family protein	Staphylococcus epidermidis	C107FS4	GCA_021993885.1
MCG2440033.1	aspartate aminotransferase family protein	Staphylococcus epidermidis	C115NS1	GCA_022008105.1
MCG2434210.1	aspartate aminotransferase family protein	Staphylococcus epidermidis	C116NS1	GCA_022008135.1
MCG2415543.1	aspartate aminotransferase family protein	Staphylococcus epidermidis	C118FS1	GCA_022005775.1
MCG2473505.1	aspartate aminotransferase family protein	Staphylococcus epidermidis	C124FS2	GCA_022006175.1
MCG1476153.1	aspartate aminotransferase family protein	Staphylococcus epidermidis	C21P1NS1	GCA_021994715.1
MCG1397947.1	aspartate aminotransferase family protein	Staphylococcus epidermidis	C30RBA1	GCA_021993535.1
MCG1519309.1	aspartate aminotransferase family protein	Staphylococcus epidermidis	C43NS1	GCA_021995075.1
MCG1482572.1	aspartate aminotransferase family protein	Staphylococcus epidermidis	C48FS2	GCA_021994725.1
MCG1337569.1	aspartate aminotransferase family protein	Staphylococcus epidermidis	C49NS2	GCA_021992715.1
MCG1537327.1	aspartate aminotransferase family protein	Staphylococcus epidermidis	C56NS1	GCA_021995145.1
MCG1475151.1	aspartate aminotransferase family protein	Staphylococcus epidermidis	C59NS2	GCA_021994655.1
MCG1386504.1	aspartate aminotransferase family protein	Staphylococcus epidermidis	C60FS2	GCA_021993295.1
MCG1382330.1	aspartate aminotransferase family protein	Staphylococcus epidermidis	C60NS2	GCA_021993335.1
MCG1487211.1	aspartate aminotransferase family protein	Staphylococcus epidermidis	C63NS2	GCA_021994775.1
MCG1496406.1	aspartate aminotransferase family protein	Staphylococcus epidermidis	C63RBA3	GCA_021994815.1
MCG1307265.1	aspartate aminotransferase family protein	Staphylococcus epidermidis	C67NS1	GCA_021992275.1
MCG1813934.1	aspartate aminotransferase family protein	Staphylococcus epidermidis	C72NS1	GCA_021999085.1
MCG1517071.1	aspartate aminotransferase family protein	Staphylococcus epidermidis	C81NS1	GCA_021995055.1
MCG1510245.1	aspartate aminotransferase family protein	Staphylococcus epidermidis	C82NS1	GCA_021994935.1
MCG1501015.1	aspartate aminotransferase family protein	Staphylococcus epidermidis	C85NS1	GCA_021994825.1
MCG1319809.1	aspartate aminotransferase family protein	Staphylococcus epidermidis	C91NS2	GCA_021992405.1
MCG1321995.1	aspartate aminotransferase family protein	Staphylococcus epidermidis	C91RBA1	GCA_021992385.1
MCG1342232.1	aspartate aminotransferase family protein	Staphylococcus epidermidis	C96NS1	GCA_021992595.1
MCG1466713.1	aspartate aminotransferase family protein	Staphylococcus epidermidis	C98FS1	GCA_021994475.1
UOH68166.1	aspartate aminotransferase family protein	Staphylococcus epidermidis	C99	GCA_022832895.1
UOH68124.1	aspartate aminotransferase family protein	Staphylococcus epidermidis	C99	GCA_022832895.1
WP_002494529.1	aspartate aminotransferase family protein	Staphylococcus epidermidis	CCSM0287	GCF_026153315.1
WP_032605060.1	aspartate aminotransferase family protein	Staphylococcus epidermidis	CDC120	GCF_003856395.1
WP_032605060.1	aspartate aminotransferase family protein	Staphylococcus epidermidis	CDC121	GCF_003856455.1
UNH21485.1	aspartate aminotransferase family protein	Staphylococcus epidermidis	CICARIA	GCA_022591335.1
WP_032605060.1	aspartate aminotransferase family protein	Staphylococcus epidermidis	CKFA-393	GCF_030435915.1
MEQ2875876.1	aspartate aminotransferase family protein	Staphylococcus epidermidis	CLA-AA-H299	GCA_040093355.1
MEN4498796.1	aspartate aminotransferase family protein	Staphylococcus epidermidis	CL-sep-1	GCA_039668575.1
MEN4518265.1	aspartate aminotransferase family protein	Staphylococcus epidermidis	CL-sep-2	GCA_039669525.1
MEN4482541.1	aspartate aminotransferase family protein	Staphylococcus epidermidis	CL-sep-3	GCA_039668545.1
MEN4413169.1	aspartate aminotransferase family protein	Staphylococcus epidermidis	CL-sep-4	GCA_039668525.1
MEN4460342.1	aspartate aminotransferase family protein	Staphylococcus epidermidis	CL-sep-5	GCA_039668425.1
MEN4510983.1	aspartate aminotransferase family protein	Staphylococcus epidermidis	CL-sep-6	GCA_039669505.1
WP_002498810.1	aspartate aminotransferase family protein	Staphylococcus epidermidis	CL-sep-7	GCF_039748715.1
MEN4457772.1	aspartate aminotransferase family protein	Staphylococcus epidermidis	CL-sep-8	GCA_039668415.1
WP_032602160.1	aspartate aminotransferase family protein	Staphylococcus epidermidis	COB-Sec2	GCF_029211365.1
AXE40376.1	aminotransferase class V-fold PLP-dependent enzyme	Staphylococcus epidermidis	CSF41498	GCA_003325735.1
AUJ75314.1	pyridoxal-dependent decarboxylase	Staphylococcus epidermidis	DAR1907	GCA_002850315.1
WP_032605060.1	aspartate aminotransferase family protein	Staphylococcus epidermidis	DE0124	GCF_007679125.1
WP_002498810.1	aspartate aminotransferase family protein	Staphylococcus epidermidis	DE0134	GCF_007678985.1
WP_162152939.1	aspartate aminotransferase family protein	Staphylococcus epidermidis	DE0179	GCF_007678235.1
WP_032603195.1	aspartate aminotransferase family protein	Staphylococcus epidermidis	DE0250	GCF_007677235.1
WP_032605060.1	aspartate aminotransferase family protein	Staphylococcus epidermidis	DE0348	GCF_007673625.1
WP_032605060.1	aspartate aminotransferase family protein	Staphylococcus epidermidis	DE0350	GCF_007673575.1
WP_002498810.1	aspartate aminotransferase family protein	Staphylococcus epidermidis	DE0403	GCF_007672855.1
WP_032602160.1	aspartate aminotransferase family protein	Staphylococcus epidermidis	DE0449	GCF_007667855.1
WP_002498810.1	aspartate aminotransferase family protein	Staphylococcus epidermidis	DE0546	GCF_007666195.1
WP_049386152.1	aspartate aminotransferase family protein	Staphylococcus epidermidis	DE0572	GCF_007665825.1
WMM18208.1	aspartate aminotransferase family protein	Staphylococcus epidermidis	DRD-48	GCA_030931415.1
MDS0932052.1	aspartate aminotransferase family protein	Staphylococcus epidermidis	E109	GCA_031630855.1
MDS0963887.1	aspartate aminotransferase family protein	Staphylococcus epidermidis	E6	GCF_031630995.1
OAW97186.1	pyridoxal-dependent decarboxylase	Staphylococcus epidermidis	ENVH113	GCA_001659315.1
OAX03298.1	pyridoxal-dependent decarboxylase	Staphylococcus epidermidis	ENVH150	GCA_001659345.1
OAW91883.1	pyridoxal-dependent decarboxylase	Staphylococcus epidermidis	ENVL300	GCA_001659225.1
OAX01494.1	pyridoxal-dependent decarboxylase	Staphylococcus epidermidis	ENVP605	GCA_001659305.1
MCK6237676.1	aspartate aminotransferase family protein	Staphylococcus epidermidis	EYE_110	GCA_023149015.1
MCK6235404.1	aspartate aminotransferase family protein	Staphylococcus epidermidis	EYE_113	GCA_023149045.1
MCK6072430.1	aspartate aminotransferase family protein	Staphylococcus epidermidis	EYE_508	GCA_023147295.1
MCK6156713.1	aspartate aminotransferase family protein	Staphylococcus epidermidis	EYE_9	GCA_023148275.1
MCK6119347.1	aspartate aminotransferase family protein	Staphylococcus epidermidis	EYE_92	GCA_023147805.1
AYY61787.1	aminotransferase class V-fold PLP-dependent enzyme	Staphylococcus epidermidis	FDAARGOS_529	GCF_003812425.1
QPS00547.1	aspartate aminotransferase family protein	Staphylococcus epidermidis	FDAARGOS_913	GCA_016026915.1
WP_032605060.1	aspartate aminotransferase family protein	Staphylococcus epidermidis	FFDD-460B	GCF_964209135.1
WP_002498810.1	aspartate aminotransferase family protein	Staphylococcus epidermidis	FFTB-39185-A	GCF_964211195.1
MCG1903079.1	aspartate aminotransferase family protein	Staphylococcus epidermidis	H17NS1	GCA_022000245.1
MCG2571079.1	aspartate aminotransferase family protein	Staphylococcus epidermidis	H21NS1	GCA_022007655.1
MCG2564802.1	aspartate aminotransferase family protein	Staphylococcus epidermidis	H22NS1	GCA_022007575.1
MCG2569252.1	aspartate aminotransferase family protein	Staphylococcus epidermidis	H23NS1	GCA_022007565.1
MCG2566926.1	aspartate aminotransferase family protein	Staphylococcus epidermidis	H24BAL1	GCA_022007425.1
MCG2533058.1	aspartate aminotransferase family protein	Staphylococcus epidermidis	H24NS1	GCA_022007365.1
MCG2555758.1	aspartate aminotransferase family protein	Staphylococcus epidermidis	H27BAL1	GCA_022007295.1
MCG2542190.1	aspartate aminotransferase family protein	Staphylococcus epidermidis	H31NS1	GCA_022007115.1
MCG2472233.1	aspartate aminotransferase family protein	Staphylococcus epidermidis	H32FS2	GCA_022005975.1
MCG2521787.1	aspartate aminotransferase family protein	Staphylococcus epidermidis	H32NS1	GCA_022007045.1
MCG2482992.1	aspartate aminotransferase family protein	Staphylococcus epidermidis	H34NS1	GCA_022007035.1
MCG2511801.1	aspartate aminotransferase family protein	Staphylococcus epidermidis	H36NS1	GCA_022006835.1
MCD8831060.1	aspartate aminotransferase family protein	Staphylococcus epidermidis	H3ow	GCF_021191715.1
MCD8876909.1	aspartate aminotransferase family protein	Staphylococcus epidermidis	H3SW	GCF_021190695.1
MCG1914516.1	aspartate aminotransferase family protein	Staphylococcus epidermidis	H7NS1	GCA_022000215.1
MCG1880118.1	aspartate aminotransferase family protein	Staphylococcus epidermidis	H9NS1	GCA_022000085.1
MCO6251963.1	aspartate aminotransferase family protein	Staphylococcus epidermidis	HAA152	GCA_024091745.1
WP_049386152.1	aspartate aminotransferase family protein	Staphylococcus epidermidis	HAA292	GCF_024090755.1
MCO6198964.1	aspartate aminotransferase family protein	Staphylococcus epidermidis	HAA72	GCA_024091935.1
MCO6263453.1	aspartate aminotransferase family protein	Staphylococcus epidermidis	HAB157	GCA_024091715.1
MCO6339876.1	aspartate aminotransferase family protein	Staphylococcus epidermidis	HAB579	GCA_024090215.1
MCO6214968.1	aspartate aminotransferase family protein	Staphylococcus epidermidis	HAC106	GCA_024091785.1
MCO6201818.1	aspartate aminotransferase family protein	Staphylococcus epidermidis	HAC146	GCA_024091735.1
MCO6329029.1	aspartate aminotransferase family protein	Staphylococcus epidermidis	HAC306	GCA_024090575.1
MCO6320020.1	aspartate aminotransferase family protein	Staphylococcus epidermidis	HAC326	GCA_024090535.1
MCO6351381.1	aspartate aminotransferase family protein	Staphylococcus epidermidis	HAC588	GCA_024090225.1
MCO6276655.1	aspartate aminotransferase family protein	Staphylococcus epidermidis	HAF241	GCA_024091105.1
MCO6314574.1	aspartate aminotransferase family protein	Staphylococcus epidermidis	HAF305	GCA_024090695.1
MCO6323782.1	aspartate aminotransferase family protein	Staphylococcus epidermidis	HAF321	GCA_024090545.1
MCO6335606.1	aspartate aminotransferase family protein	Staphylococcus epidermidis	HAF424	GCA_024090345.1
MCO6343059.1	aspartate aminotransferase family protein	Staphylococcus epidermidis	HAF441	GCA_024090295.1
MCO6346070.1	aspartate aminotransferase family protein	Staphylococcus epidermidis	HAF582	GCA_024090255.1
WP_032602160.1	aspartate aminotransferase family protein	Staphylococcus epidermidis	HAF61	GCF_024091955.1
MBM5857872.1	aspartate aminotransferase family protein	Staphylococcus epidermidis	HD04N3	GCA_016882665.1
MBM5923480.1	aspartate aminotransferase family protein	Staphylococcus epidermidis	HD05-5	GCA_016883445.1
MBM5932659.1	aspartate aminotransferase family protein	Staphylococcus epidermidis	HD05-6	GCA_016883485.1
QRJ35592.1	aspartate aminotransferase family protein	Staphylococcus epidermidis	HD12-1	GCA_016855765.1
QRL37053.1	aspartate aminotransferase family protein	Staphylococcus epidermidis	HD12-4	GCA_016859635.1
QRL35735.1	aspartate aminotransferase family protein	Staphylococcus epidermidis	HD12-5	GCA_016859615.1
QRL33482.1	aspartate aminotransferase family protein	Staphylococcus epidermidis	HD12-6	GCA_016859595.1
MBM6262512.1	aspartate aminotransferase family protein	Staphylococcus epidermidis	HD12-7	GCA_016886485.1
QRL30218.1	aspartate aminotransferase family protein	Staphylococcus epidermidis	HD12-9	GCA_016859575.1
MCG8948961.1	aspartate aminotransferase family protein	Staphylococcus epidermidis	HD12N4	GCA_022392625.1
QRJ50411.1	aspartate aminotransferase family protein	Staphylococcus epidermidis	HD15-1	GCA_016856245.1
MBM6138164.1	aspartate aminotransferase family protein	Staphylococcus epidermidis	HD15-10	GCA_016885385.1
MBM6140623.1	aspartate aminotransferase family protein	Staphylococcus epidermidis	HD15-2	GCA_016885365.1
MBM6151906.1	aspartate aminotransferase family protein	Staphylococcus epidermidis	HD15-3	GCA_016885445.1
MBM6126976.1	aspartate aminotransferase family protein	Staphylococcus epidermidis	HD15-4	GCA_016885165.1
MBM6133710.1	aspartate aminotransferase family protein	Staphylococcus epidermidis	HD15-5	GCA_016885325.1
MBM6147433.1	aspartate aminotransferase family protein	Staphylococcus epidermidis	HD15-6	GCA_016885425.1
MBM6149667.1	aspartate aminotransferase family protein	Staphylococcus epidermidis	HD15-7	GCA_016885465.1
MBM6136004.1	aspartate aminotransferase family protein	Staphylococcus epidermidis	HD15-8	GCA_016885345.1
MBM6142855.1	aspartate aminotransferase family protein	Staphylococcus epidermidis	HD15-9	GCA_016885395.1
MBM6131380.1	aspartate aminotransferase family protein	Staphylococcus epidermidis	HD15N1	GCA_016885265.1
MBM6129220.1	aspartate aminotransferase family protein	Staphylococcus epidermidis	HD15N5	GCA_016885285.1
MBM6156311.1	aspartate aminotransferase family protein	Staphylococcus epidermidis	HD15N6	GCA_016885485.1
MBM6154077.1	aspartate aminotransferase family protein	Staphylococcus epidermidis	HD15N7	GCA_016885525.1
MBM6145028.1	aspartate aminotransferase family protein	Staphylococcus epidermidis	HD15N8	GCA_016885295.1
MBM6102440.1	aspartate aminotransferase family protein	Staphylococcus epidermidis	HD21-1	GCA_016885085.1
MBM6121850.1	aspartate aminotransferase family protein	Staphylococcus epidermidis	HD21-10	GCA_016885245.1
QRJ41087.1	aspartate aminotransferase family protein	Staphylococcus epidermidis	HD21-2	GCA_016855945.1
MBM6099986.1	aspartate aminotransferase family protein	Staphylococcus epidermidis	HD21-3	GCA_016885025.1
MBM6112175.1	aspartate aminotransferase family protein	Staphylococcus epidermidis	HD21-4	GCA_016885105.1
MBM6084986.1	aspartate aminotransferase family protein	Staphylococcus epidermidis	HD21-5	GCA_016885005.1
MBM6104894.1	aspartate aminotransferase family protein	Staphylococcus epidermidis	HD21-6	GCA_016885125.1
MBM6114575.1	aspartate aminotransferase family protein	Staphylococcus epidermidis	HD21-7	GCA_016885045.1
MBM6119336.1	aspartate aminotransferase family protein	Staphylococcus epidermidis	HD21-8	GCA_016885185.1
MBM6095058.1	aspartate aminotransferase family protein	Staphylococcus epidermidis	HD21-9	GCA_016884965.1
MBM6124263.1	aspartate aminotransferase family protein	Staphylococcus epidermidis	HD21N12	GCA_016885195.1
MBM6107354.1	aspartate aminotransferase family protein	Staphylococcus epidermidis	HD21N13	GCA_016885145.1
MBM6087489.1	aspartate aminotransferase family protein	Staphylococcus epidermidis	HD21N14	GCA_016884905.1
QSD92797.1	aspartate aminotransferase family protein	Staphylococcus epidermidis	HD21N4	GCA_016954495.1
MBM6089954.1	aspartate aminotransferase family protein	Staphylococcus epidermidis	HD21N5	GCA_016884945.1
MBM6097460.1	aspartate aminotransferase family protein	Staphylococcus epidermidis	HD21N7	GCA_016884925.1
MBM6092480.1	aspartate aminotransferase family protein	Staphylococcus epidermidis	HD21N8	GCA_016884985.1
QRJ28641.1	aspartate aminotransferase family protein	Staphylococcus epidermidis	HD25-1	GCA_016855625.1
MBM6283779.1	aspartate aminotransferase family protein	Staphylococcus epidermidis	HD25-10	GCA_016886565.1
MBM6296013.1	aspartate aminotransferase family protein	Staphylococcus epidermidis	HD25-11	GCA_016886665.1
MBM6293584.1	aspartate aminotransferase family protein	Staphylococcus epidermidis	HD25-12	GCA_016886645.1
MBM6291161.1	aspartate aminotransferase family protein	Staphylococcus epidermidis	HD25-2	GCA_016886685.1
MBM6278865.1	aspartate aminotransferase family protein	Staphylococcus epidermidis	HD25-3	GCA_016886575.1
MBM6276442.1	aspartate aminotransferase family protein	Staphylococcus epidermidis	HD25-4	GCA_016886585.1
MBM6269207.1	aspartate aminotransferase family protein	Staphylococcus epidermidis	HD25-5	GCA_016886465.1
MBM6271635.1	aspartate aminotransferase family protein	Staphylococcus epidermidis	HD25-6	GCA_016886545.1
MBM6281288.1	aspartate aminotransferase family protein	Staphylococcus epidermidis	HD25-7	GCA_016886625.1
MBM6286201.1	aspartate aminotransferase family protein	Staphylococcus epidermidis	HD25-8	GCA_016886675.1
MBM6274064.1	aspartate aminotransferase family protein	Staphylococcus epidermidis	HD25-9	GCA_016886505.1
MCG8946708.1	aspartate aminotransferase family protein	Staphylococcus epidermidis	HD25N1	GCA_022392585.1
MCG8935336.1	aspartate aminotransferase family protein	Staphylococcus epidermidis	HD25N15	GCA_022392565.1
MBM6298450.1	aspartate aminotransferase family protein	Staphylococcus epidermidis	HD25N3	GCA_016886745.1
MBM6249045.1	aspartate aminotransferase family protein	Staphylococcus epidermidis	HD26N2	GCA_016886395.1
QRJ21752.1	aspartate aminotransferase family protein	Staphylococcus epidermidis	HD31-1	GCA_016855565.1
MBM6332093.1	aspartate aminotransferase family protein	Staphylococcus epidermidis	HD31-2	GCA_016886995.1
MBM6310547.1	aspartate aminotransferase family protein	Staphylococcus epidermidis	HD31-3	GCA_016886945.1
MBM6322538.1	aspartate aminotransferase family protein	Staphylococcus epidermidis	HD31-4	GCA_016887025.1
MBM6317837.1	aspartate aminotransferase family protein	Staphylococcus epidermidis	HD31-5	GCA_016886985.1
MBM6338991.1	aspartate aminotransferase family protein	Staphylococcus epidermidis	HD31N1	GCA_016887035.1
MBM6327395.1	aspartate aminotransferase family protein	Staphylococcus epidermidis	HD31N3	GCA_016886965.1
MBM6046104.1	aspartate aminotransferase family protein	Staphylococcus epidermidis	HD33N1	GCA_016884585.1
MBM6048826.1	aspartate aminotransferase family protein	Staphylococcus epidermidis	HD33N12	GCA_016884595.1
QRJ17219.1	aspartate aminotransferase family protein	Staphylococcus epidermidis	HD39-1	GCA_016855525.1
MBM5959655.1	aspartate aminotransferase family protein	Staphylococcus epidermidis	HD39-10	GCA_016883685.1
MBM5939494.1	aspartate aminotransferase family protein	Staphylococcus epidermidis	HD39-2	GCA_016883605.1
QRL19306.1	aspartate aminotransferase family protein	Staphylococcus epidermidis	HD39-3	GCA_016859475.1
MBM5941740.1	aspartate aminotransferase family protein	Staphylococcus epidermidis	HD39-4	GCA_016883585.1
MBM5948487.1	aspartate aminotransferase family protein	Staphylococcus epidermidis	HD39-5	GCA_016883665.1
MBM5953032.1	aspartate aminotransferase family protein	Staphylococcus epidermidis	HD39-6	GCA_016883645.1
MBM5946231.1	aspartate aminotransferase family protein	Staphylococcus epidermidis	HD39-7	GCA_016883765.1
MBM5932812.1	aspartate aminotransferase family protein	Staphylococcus epidermidis	HD39-8	GCA_016883595.1
MBM5935006.1	aspartate aminotransferase family protein	Staphylococcus epidermidis	HD39-9	GCA_016883565.1
MBM6356444.1	aspartate aminotransferase family protein	Staphylococcus epidermidis	HD40-1	GCA_016887165.1
MBM6334585.1	aspartate aminotransferase family protein	Staphylococcus epidermidis	HD40-2	GCA_016887095.1
MBM6341319.1	aspartate aminotransferase family protein	Staphylococcus epidermidis	HD40-3	GCA_016887145.1
QRJ14917.1	aspartate aminotransferase family protein	Staphylococcus epidermidis	HD40-5	GCA_016855505.1
QDA65084.1	aspartate aminotransferase family protein	Staphylococcus epidermidis	HD43	GCF_006337205.1
QRJ12751.1	aspartate aminotransferase family protein	Staphylococcus epidermidis	HD43-1	GCA_016855485.1
QRL24605.1	aspartate aminotransferase family protein	Staphylococcus epidermidis	HD43-10	GCA_016859515.1
MBM5986143.1	aspartate aminotransferase family protein	Staphylococcus epidermidis	HD43-2	GCA_016883955.1
QRL22451.1	aspartate aminotransferase family protein	Staphylococcus epidermidis	HD43-3	GCA_016859495.1
MBM5972928.1	aspartate aminotransferase family protein	Staphylococcus epidermidis	HD43-5	GCA_016883865.1
MBM5975105.1	aspartate aminotransferase family protein	Staphylococcus epidermidis	HD43-6	GCA_016883925.1
MBM5961849.1	aspartate aminotransferase family protein	Staphylococcus epidermidis	HD43-7	GCA_016883805.1
MBM5979450.1	aspartate aminotransferase family protein	Staphylococcus epidermidis	HD43-8	GCA_016883875.1
MBM5957455.1	aspartate aminotransferase family protein	Staphylococcus epidermidis	HD43-9	GCA_016883815.1
MBM5963965.1	aspartate aminotransferase family protein	Staphylococcus epidermidis	HD43N1	GCA_016883775.1
MBM5955257.1	aspartate aminotransferase family protein	Staphylococcus epidermidis	HD43N3	GCA_016883745.1
QRJ10209.1	aspartate aminotransferase family protein	Staphylococcus epidermidis	HD46-1	GCA_016855465.1
MBM6315365.1	aspartate aminotransferase family protein	Staphylococcus epidermidis	HD46-10	GCA_016886925.1
MBM6308028.1	aspartate aminotransferase family protein	Staphylococcus epidermidis	HD46-2	GCA_016886785.1
MBM6305560.1	aspartate aminotransferase family protein	Staphylococcus epidermidis	HD46-3	GCA_016886825.1
MBM6324885.1	aspartate aminotransferase family protein	Staphylococcus epidermidis	HD46-4	GCA_016886865.1
MBM6300617.1	aspartate aminotransferase family protein	Staphylococcus epidermidis	HD46-5	GCA_016886765.1
MBM6312894.1	aspartate aminotransferase family protein	Staphylococcus epidermidis	HD46-6	GCA_016886905.1
MBM6329624.1	aspartate aminotransferase family protein	Staphylococcus epidermidis	HD46-7	GCA_016886885.1
MBM6288650.1	aspartate aminotransferase family protein	Staphylococcus epidermidis	HD46-8	GCA_016886725.1
MBM6303088.1	aspartate aminotransferase family protein	Staphylococcus epidermidis	HD46-9	GCA_016886805.1
QRJ07960.1	aspartate aminotransferase family protein	Staphylococcus epidermidis	HD47-1	GCA_016855445.1
MBM6060238.1	aspartate aminotransferase family protein	Staphylococcus epidermidis	HD47-3	GCA_016884725.1
MBM6058000.1	aspartate aminotransferase family protein	Staphylococcus epidermidis	HD47-4	GCA_016884755.1
MBM6078205.1	aspartate aminotransferase family protein	Staphylococcus epidermidis	HD47-5	GCA_016884855.1
MBM6073688.1	aspartate aminotransferase family protein	Staphylococcus epidermidis	HD47N1	GCA_016884785.1
MBM6080475.1	aspartate aminotransferase family protein	Staphylococcus epidermidis	HD47N4	GCA_016884885.1
MBM6075917.1	aspartate aminotransferase family protein	Staphylococcus epidermidis	HD47N5	GCA_016884825.1
MBM5997286.1	aspartate aminotransferase family protein	Staphylococcus epidermidis	HD66N1	GCA_016884165.1
MBM6030772.1	aspartate aminotransferase family protein	Staphylococcus epidermidis	HD69N2	GCA_016884405.1
MBM6221465.1	aspartate aminotransferase family protein	Staphylococcus epidermidis	HD75N1	GCA_016886045.1
MBM6205352.1	aspartate aminotransferase family protein	Staphylococcus epidermidis	HD75N2	GCA_016885985.1
MBM6214684.1	aspartate aminotransferase family protein	Staphylococcus epidermidis	HD75N5	GCA_016886005.1
MBM6212378.1	aspartate aminotransferase family protein	Staphylococcus epidermidis	HD75N6	GCA_016886025.1
QRI98544.1	aspartate aminotransferase family protein	Staphylococcus epidermidis	HD99-1	GCA_016855125.1
MBM6202945.1	aspartate aminotransferase family protein	Staphylococcus epidermidis	HD99-3	GCA_016885885.1
QRI93734.1	aspartate aminotransferase family protein	Staphylococcus epidermidis	HD99-4	GCA_016855105.1
MBE7320283.1	aspartate aminotransferase family protein	Staphylococcus epidermidis	HESS022	GCA_015070365.1
MBC3098807.1	aspartate aminotransferase family protein	Staphylococcus epidermidis	IIF2SC-B1	GCA_014266135.1
MBC2977833.1	aspartate aminotransferase family protein	Staphylococcus epidermidis	IIF2SC-B1-RA	GCA_014265485.1
MBC3092146.1	aspartate aminotransferase family protein	Staphylococcus epidermidis	IIF3SC-B8	GCA_014266565.1
MBC2939403.1	aspartate aminotransferase family protein	Staphylococcus epidermidis	IIF3SC-B8-RA	GCA_014265405.1
MBC3092875.1	aspartate aminotransferase family protein	Staphylococcus epidermidis	IIF3SC-B9	GCA_014266535.1
MBC2999722.1	aspartate aminotransferase family protein	Staphylococcus epidermidis	IIF3SC-B9-RA	GCA_014265545.1
MBC3118179.1	aspartate aminotransferase family protein	Staphylococcus epidermidis	IIF6SW-P4	GCA_014267185.1
MBC2924110.1	aspartate aminotransferase family protein	Staphylococcus epidermidis	IIF6SW-P4-RA	GCA_014265445.1
MBC3096629.1	aspartate aminotransferase family protein	Staphylococcus epidermidis	IIF6SW-P5A	GCA_014266795.1
MBC3054506.1	aspartate aminotransferase family protein	Staphylococcus epidermidis	IIF7SC-B3	GCA_014266265.1
MBC3042997.1	aspartate aminotransferase family protein	Staphylococcus epidermidis	IIF7SC-B6	GCA_014266335.1
MBC2943817.1	aspartate aminotransferase family protein	Staphylococcus epidermidis	IIF7SC-B6-RA	GCA_014265335.1
MBC3045463.1	aspartate aminotransferase family protein	Staphylococcus epidermidis	IIF7SC-B7	GCA_014323365.1
WP_002498810.1	aspartate aminotransferase family protein	Staphylococcus epidermidis	IRL01	GCF_009685135.1
MEX2993304.1	aspartate aminotransferase family protein	Staphylococcus epidermidis	JCT0126	GCA_040933515.1
MCH9570504.1	aspartate aminotransferase family protein	Staphylococcus epidermidis	JMF-2008-C-0009	GCA_022586595.1
MCH9556160.1	aspartate aminotransferase family protein	Staphylococcus epidermidis	JMF-2008-C-0010	GCA_022586575.1
WP_002498810.1	aspartate aminotransferase family protein	Staphylococcus epidermidis	JONWP031	GCF_037698905.1
WP_002498810.1	aspartate aminotransferase family protein	Staphylococcus epidermidis	JONWP038	GCF_037698585.1
WP_002494529.1	aspartate aminotransferase family protein	Staphylococcus epidermidis	JONWP041	GCF_037698495.1
WP_002498810.1	aspartate aminotransferase family protein	Staphylococcus epidermidis	JONWP051	GCF_037698045.1
WP_002498810.1	aspartate aminotransferase family protein	Staphylococcus epidermidis	JONWP063	GCF_037697525.1
WP_002498810.1	aspartate aminotransferase family protein	Staphylococcus epidermidis	JONWP065	GCF_037697475.1
WP_002498810.1	aspartate aminotransferase family protein	Staphylococcus epidermidis	JONWP071	GCF_037697195.1
WP_002498810.1	aspartate aminotransferase family protein	Staphylococcus epidermidis	JONWP074	GCF_037697115.1
WP_002498810.1	aspartate aminotransferase family protein	Staphylococcus epidermidis	JONWP076	GCF_037697055.1
WP_002498810.1	aspartate aminotransferase family protein	Staphylococcus epidermidis	JONWP102	GCF_037696035.1
WP_002498810.1	aspartate aminotransferase family protein	Staphylococcus epidermidis	JONWP105	GCF_037695845.1
WP_002498810.1	aspartate aminotransferase family protein	Staphylococcus epidermidis	JONWP106	GCF_037695775.1
MBV5133440.1	aspartate aminotransferase family protein	Staphylococcus epidermidis	K60	GCA_019149245.1
OAW59512.1	pyridoxal-dependent decarboxylase	Staphylococcus epidermidis	Kt1p58	GCA_001658985.1
MEX3465296.1	aspartate aminotransferase family protein	Staphylococcus epidermidis	LK1992	GCA_040947245.1
MEX3435673.1	aspartate aminotransferase family protein	Staphylococcus epidermidis	LK2133	GCA_040947085.1
MEX3457284.1	aspartate aminotransferase family protein	Staphylococcus epidermidis	LK2171	GCA_040947045.1
KZG50769.1	pyridoxal-dependent decarboxylase	Staphylococcus epidermidis	LRKNS014	GCA_001622575.1
KZG58222.1	pyridoxal-dependent decarboxylase	Staphylococcus epidermidis	LRKNS017	GCA_001622605.1
KZG58453.1	pyridoxal-dependent decarboxylase	Staphylococcus epidermidis	LRKNS020	GCA_001622625.1
KZG58133.1	pyridoxal-dependent decarboxylase	Staphylococcus epidermidis	LRKNS026	GCA_001622635.1
KZG61462.1	pyridoxal-dependent decarboxylase	Staphylococcus epidermidis	LRKNS029	GCA_001622665.1
KZG63811.1	pyridoxal-dependent decarboxylase	Staphylococcus epidermidis	LRKNS037	GCA_001622685.1
KZG67632.1	pyridoxal-dependent decarboxylase	Staphylococcus epidermidis	LRKNS039	GCA_001622695.1
KZG76871.1	pyridoxal-dependent decarboxylase	Staphylococcus epidermidis	LRKNS046	GCA_001622715.1
KZG75815.1	pyridoxal-dependent decarboxylase	Staphylococcus epidermidis	LRKNS048	GCA_001622785.1
KZG77060.1	pyridoxal-dependent decarboxylase	Staphylococcus epidermidis	LRKNS050	GCA_001622755.1
KZG80647.1	pyridoxal-dependent decarboxylase	Staphylococcus epidermidis	LRKNS054	GCA_001622805.1
KZG86072.1	pyridoxal-dependent decarboxylase	Staphylococcus epidermidis	LRKNS056	GCA_001622825.1
KZG48380.1	pyridoxal-dependent decarboxylase	Staphylococcus epidermidis	LRKNS062	GCA_001622445.1
KZG48917.1	pyridoxal-dependent decarboxylase	Staphylococcus epidermidis	LRKNS064	GCA_001622455.1
KZG93406.1	pyridoxal-dependent decarboxylase	Staphylococcus epidermidis	LRKNS068	GCA_001622875.1
KZG91277.1	pyridoxal-dependent decarboxylase	Staphylococcus epidermidis	LRKNS072	GCA_001622905.1
OAW28932.1	pyridoxal-dependent decarboxylase	Staphylococcus epidermidis	LRKNS073	GCA_001658705.1
KZK60436.1	pyridoxal-dependent decarboxylase	Staphylococcus epidermidis	LRKNS075	GCA_001622485.1
KZK59624.1	pyridoxal-dependent decarboxylase	Staphylococcus epidermidis	LRKNS076	GCA_001622495.1
KZK62319.1	pyridoxal-dependent decarboxylase	Staphylococcus epidermidis	LRKNS077	GCA_001622525.1
OAW23786.1	pyridoxal-dependent decarboxylase	Staphylococcus epidermidis	LRKNS079	GCA_001658635.1
OAW26325.1	pyridoxal-dependent decarboxylase	Staphylococcus epidermidis	LRKNS081	GCA_001658625.1
OAW30508.1	pyridoxal-dependent decarboxylase	Staphylococcus epidermidis	LRKNS082	GCA_001658645.1
OAW33251.1	pyridoxal-dependent decarboxylase	Staphylococcus epidermidis	LRKNS083	GCA_001658835.1
KZK64307.1	pyridoxal-dependent decarboxylase	Staphylococcus epidermidis	LRKNS084	GCA_001622545.1
OAW35120.1	pyridoxal-dependent decarboxylase	Staphylococcus epidermidis	LRKNS085	GCA_001658785.1
OAW35626.1	pyridoxal-dependent decarboxylase	Staphylococcus epidermidis	LRKNS086	GCA_001658865.1
OAW39928.1	pyridoxal-dependent decarboxylase	Staphylococcus epidermidis	LRKNS087	GCA_001658715.1
OAW43106.1	pyridoxal-dependent decarboxylase	Staphylococcus epidermidis	LRKNS089	GCA_001658725.1
OAW44122.1	pyridoxal-dependent decarboxylase	Staphylococcus epidermidis	LRKNS092	GCA_001658805.1
OAW48319.1	pyridoxal-dependent decarboxylase	Staphylococcus epidermidis	LRKNS093	GCA_001658815.1
OAZ51731.1	pyridoxal-dependent decarboxylase	Staphylococcus epidermidis	LRKNS111	GCA_001662985.1
OAZ51598.1	pyridoxal-dependent decarboxylase	Staphylococcus epidermidis	LRKNS112	GCA_001663025.1
OAZ53144.1	pyridoxal-dependent decarboxylase	Staphylococcus epidermidis	LRKNS113	GCA_001663015.1
OAY90446.1	pyridoxal-dependent decarboxylase	Staphylococcus epidermidis	LRKNS114	GCA_001662145.1
OAY94017.1	pyridoxal-dependent decarboxylase	Staphylococcus epidermidis	LRKNS115	GCA_001662175.1
OAY91204.1	pyridoxal-dependent decarboxylase	Staphylococcus epidermidis	LRKNS116	GCA_001662165.1
OAY97930.1	pyridoxal-dependent decarboxylase	Staphylococcus epidermidis	LRKNS117	GCA_001662155.1
OAZ01699.1	pyridoxal-dependent decarboxylase	Staphylococcus epidermidis	LRKNS118	GCA_001662225.1
OAW51851.1	pyridoxal-dependent decarboxylase	Staphylococcus epidermidis	Lt3p20	GCA_001658905.1
ARX60721.1	pyridoxal-deC	Staphylococcus epidermidis	M13/0453
WP_002498810.1	aspartate aminotransferase family protein	Staphylococcus epidermidis	M41.3	GCF_032468735.1
MDU0454007.1	aspartate aminotransferase family protein	Staphylococcus epidermidis	M42.2	GCA_032468715.1
QHN74491.1	pyridoxal-dependent decarboxylase	Staphylococcus epidermidis	MB1143
QHN74379.1	pyridoxal-dependent decarboxylase	Staphylococcus epidermidis	MB1715
MCH6180031.1	aspartate aminotransferase family protein	Staphylococcus epidermidis	MM2021_2	GCA_022524525.1
WP_002498810.1	aspartate aminotransferase family protein	Staphylococcus epidermidis	NCTC13360	GCF_900458515.1
WP_012087795.1	aspartate aminotransferase family protein	Staphylococcus epidermidis	NCTC13924	GCF_900638695.1
WP_032605060.1	aspartate aminotransferase family protein	Staphylococcus epidermidis	NW32	GCF_001431005.1
WP_002498810.1	aspartate aminotransferase family protein	Staphylococcus epidermidis	O47	GCF_013317125.1
WP_012087795.1	aspartate aminotransferase family protein	Staphylococcus epidermidis	P1 blood culture	GCF_031734715.1
WP_012087795.1	aspartate aminotransferase family protein	Staphylococcus epidermidis	P10 blood culture	GCF_031734775.1
WP_012087795.1	aspartate aminotransferase family protein	Staphylococcus epidermidis	P11 blood culture	GCF_031734635.1
AXB88763.1	pyridoxal-deC	Staphylococcus epidermidis	P11OR1
AXB88792.1	pyridoxal-deC	Staphylococcus epidermidis	P11PPH21
WP_012087795.1	aspartate aminotransferase family protein	Staphylococcus epidermidis	P12 blood culture	GCF_031734815.1
WP_012087795.1	aspartate aminotransferase family protein	Staphylococcus epidermidis	P13 blood culture	GCF_031734735.1
WP_012087795.1	aspartate aminotransferase family protein	Staphylococcus epidermidis	P14 blood culture	GCF_031734545.1
AXB88962.1	pyridoxal-deC	Staphylococcus epidermidis	P14NS2
WP_012087795.1	aspartate aminotransferase family protein	Staphylococcus epidermidis	P15 blood culture	GCF_031734535.1
WP_012087795.1	aspartate aminotransferase family protein	Staphylococcus epidermidis	P3 blood culture Germany	GCF_031734695.1
MCT1962847.1	aspartate aminotransferase family protein	Staphylococcus epidermidis	p3-SID255	GCF_025148145.1
MCT1676005.1	aspartate aminotransferase family protein	Staphylococcus epidermidis	p3-SID653	GCA_025146855.1
MCT2328287.1	aspartate aminotransferase family protein	Staphylococcus epidermidis	p3-SID892	GCA_025150055.1
WP_012087795.1	aspartate aminotransferase family protein	Staphylococcus epidermidis	P4	GCF_031734615.1
WP_012087795.1	aspartate aminotransferase family protein	Staphylococcus epidermidis	P5	GCF_031734595.1
WP_012087795.1	aspartate aminotransferase family protein	Staphylococcus epidermidis	P6	GCF_031734655.1
WP_012087795.1	aspartate aminotransferase family protein	Staphylococcus epidermidis	P7	GCF_031734835.1
WP_012087795.1	aspartate aminotransferase family protein	Staphylococcus epidermidis	P8	GCF_031734795.1
WP_012087795.1	aspartate aminotransferase family protein	Staphylococcus epidermidis	P9	GCF_031734755.1
AXB88675.1	pyridoxal-deC	Staphylococcus epidermidis	P9OR1
AXB88704.1	pyridoxal-deC	Staphylococcus epidermidis	P9PPH12
AXB88734.1	pyridoxal-deC	Staphylococcus epidermidis	P9PPHI1
UON08435.1	aspartate aminotransferase family protein	Staphylococcus epidermidis	PartG-Sepidermidis-RM8376	GCA_022869565.1
WP_161375242.1	aspartate aminotransferase family protein	Staphylococcus epidermidis	PJFA-5102	GCF_022214875.1
OAW58091.1	pyridoxal-dependent decarboxylase	Staphylococcus epidermidis	pK_B01	GCA_001658945.1
AVP80631.1	pyridoxal-deC	Staphylococcus epidermidis	PS21NS
AXB89163.1	pyridoxal-deC	Staphylococcus epidermidis	PS34PI
AVP80713.1	pyridoxal-deC	Staphylococcus epidermidis	PS36PD
AXB89034.1	pyridoxal-deC	Staphylococcus epidermidis	PS7OR
AXB89193.1	pyridoxal-deC	Staphylococcus epidermidis	PS8TI
WP_032602160.1	aspartate aminotransferase family protein	Staphylococcus epidermidis	R10C	GCF_021513035.1
MBF2231098.1	aspartate aminotransferase family protein	Staphylococcus epidermidis	R5988	GCA_015273865.1
TES37496.1	aminotransferase class V-fold PLP-dependent enzyme	Staphylococcus epidermidis	S02	GCF_004374975.1
TES31412.1	aminotransferase class V-fold PLP-dependent enzyme	Staphylococcus epidermidis	S05	GCF_004374775.1
WP_002498810.1	aspartate aminotransferase family protein	Staphylococcus epidermidis	S12	GCF_004374965.1
WP_002498810.1	aspartate aminotransferase family protein	Staphylococcus epidermidis	S15	GCF_004374885.1
WP_002498810.1	aspartate aminotransferase family protein	Staphylococcus epidermidis	s25	GCF_016808455.1
WP_032602160.1	aspartate aminotransferase family protein	Staphylococcus epidermidis	s31	GCF_016809105.1
WP_002498810.1	aspartate aminotransferase family protein	Staphylococcus epidermidis	s32	GCF_016808435.1
WP_002498810.1	aspartate aminotransferase family protein	Staphylococcus epidermidis	s34	GCF_016808475.1
WP_002498810.1	aspartate aminotransferase family protein	Staphylococcus epidermidis	s35	GCF_016809055.1
WP_032602160.1	aspartate aminotransferase family protein	Staphylococcus epidermidis	s45	GCF_016808815.1
WP_032602160.1	aspartate aminotransferase family protein	Staphylococcus epidermidis	s46	GCF_016808855.1
WP_032602160.1	aspartate aminotransferase family protein	Staphylococcus epidermidis	s47	GCF_016808825.1
MBM0859578.1	aminotransferase class V-fold PLP-dependent enzyme	Staphylococcus epidermidis	s48	GCA_016808795.1
MBM0862265.1	aminotransferase class V-fold PLP-dependent enzyme	Staphylococcus epidermidis	s49	GCA_016808775.1
WP_002498810.1	aspartate aminotransferase family protein	Staphylococcus epidermidis	S50-2	GCF_038181765.1
WP_002498810.1	aspartate aminotransferase family protein	Staphylococcus epidermidis	S52-1	GCF_038181755.1
WP_002498810.1	aspartate aminotransferase family protein	Staphylococcus epidermidis	S52-3	GCF_038181715.1
PIH33196.1	pyridoxal-dependent decarboxylase	Staphylococcus epidermidis	SCH-20	GCF_002750185.1
RST43282.1	aminotransferase class V-fold PLP-dependent enzyme	Staphylococcus epidermidis	SCH-21	GCA_002752875.2
PIK01697.1	pyridoxal-dependent decarboxylase	Staphylococcus epidermidis	SCH-23	GCA_002752825.1
RUN41157.1	pyridoxal-dependent decarboxylase	Staphylococcus epidermidis	SE43	GCA_003979885.1
WP_002498810.1	aspartate aminotransferase family protein	Staphylococcus epidermidis	SE49	GCF_008922445.1
RUN57307.1	pyridoxal-dependent decarboxylase	Staphylococcus epidermidis	SE52	GCA_003979975.1
RUN60852.1	pyridoxal-dependent decarboxylase	Staphylococcus epidermidis	SE53	GCA_003979985.1
RUN63101.1	pyridoxal-dependent decarboxylase	Staphylococcus epidermidis	SE55	GCA_003980155.1
RUN64857.1	pyridoxal-dependent decarboxylase	Staphylococcus epidermidis	SE56	GCA_003980185.1
RUN65660.1	pyridoxal-dependent decarboxylase	Staphylococcus epidermidis	SE57	GCA_003980195.1
RUN66900.1	pyridoxal-dependent decarboxylase	Staphylococcus epidermidis	SE58	GCA_003980175.1
WP_002498810.1	aspartate aminotransferase family protein	Staphylococcus epidermidis	SE60	GCF_008922265.1
WP_002498810.1	aspartate aminotransferase family protein	Staphylococcus epidermidis	SE61	GCF_008922615.1
WP_002498810.1	aspartate aminotransferase family protein	Staphylococcus epidermidis	SE63	GCF_008922315.1
WP_002498810.1	aspartate aminotransferase family protein	Staphylococcus epidermidis	SE64	GCF_008922285.1
KAB2192624.1	aspartate aminotransferase family protein	Staphylococcus epidermidis	SE67	GCF_009026095.1
KAB2180345.1	aspartate aminotransferase family protein	Staphylococcus epidermidis	SE74	GCA_008922155.1
WP_002498810.1	aspartate aminotransferase family protein	Staphylococcus epidermidis	SE75	GCF_008922165.1
WP_002498810.1	aspartate aminotransferase family protein	Staphylococcus epidermidis	SE78	GCF_008922115.1
AIR83792.1	beta-eliminating lyase family protein	Staphylococcus epidermidis	SEI	GCA_000759555.1
MDS3971958.1	aspartate aminotransferase family protein	Staphylococcus epidermidis	SENIH006	GCA_031727835.1
MDS3937518.1	aspartate aminotransferase family protein	Staphylococcus epidermidis	SENIH041	GCA_031728915.1
MDS3942317.1	aspartate aminotransferase family protein	Staphylococcus epidermidis	SENIH042	GCA_031728875.1
WP_012087795.1	aspartate aminotransferase family protein	Staphylococcus epidermidis	SESURV_p1_0612	GCF_011307015.1
WP_032602160.1	aspartate aminotransferase family protein	Staphylococcus epidermidis	SESURV_p3_0825	GCF_011307475.1
WP_032602160.1	aspartate aminotransferase family protein	Staphylococcus epidermidis	SESURV_p3_1362	GCF_011307695.1
WP_002498810.1	aspartate aminotransferase family protein	Staphylococcus epidermidis	SEYJ101	GCF_009663955.1
WP_002498810.1	aspartate aminotransferase family protein	Staphylococcus epidermidis	SH03_17	GCF_002799485.1
WP_002498810.1	aspartate aminotransferase family protein	Staphylococcus epidermidis	SH05_16	GCF_002799505.1
WP_002498810.1	aspartate aminotransferase family protein	Staphylococcus epidermidis	SH06_17	GCF_002799565.1
WP_161375242.1	aspartate aminotransferase family protein	Staphylococcus epidermidis	SNUC 1329	GCF_003035305.1
WP_161375242.1	aspartate aminotransferase family protein	Staphylococcus epidermidis	SNUC 1357	GCF_003035325.1
WP_161375242.1	aspartate aminotransferase family protein	Staphylococcus epidermidis	SNUC 1400	GCF_003578065.1
WP_012087795.1	aspartate aminotransferase family protein	Staphylococcus epidermidis	SNUC 170	GCF_003577865.1
WP_161375242.1	aspartate aminotransferase family protein	Staphylococcus epidermidis	SNUC 1856	GCF_003577825.1
PTE45267.1	pyridoxal-dependent decarboxylase	Staphylococcus epidermidis	SNUC 2400	GCA_003035275.1
WP_161375242.1	aspartate aminotransferase family protein	Staphylococcus epidermidis	SNUC 2450	GCF_003035745.1
WP_161375242.1	aspartate aminotransferase family protein	Staphylococcus epidermidis	SNUC 258	GCF_003035385.1
WP_161375242.1	aspartate aminotransferase family protein	Staphylococcus epidermidis	SNUC 29	GCF_003035425.1
WP_012087795.1	aspartate aminotransferase family protein	Staphylococcus epidermidis	SNUC 291	GCF_003035365.1
WP_161375242.1	aspartate aminotransferase family protein	Staphylococcus epidermidis	SNUC 3868	GCF_003035705.1
WP_161375242.1	aspartate aminotransferase family protein	Staphylococcus epidermidis	SNUC 5996	GCF_003578045.1
WP_161375242.1	aspartate aminotransferase family protein	Staphylococcus epidermidis	SNUC 75	GCF_003035405.1
MCC2092683.1	aspartate aminotransferase family protein	Staphylococcus epidermidis	SS216_SE_UNIFESP	GCA_020682905.1
BAU98161.1	hypothetical protein	Staphylococcus epidermidis	NTUH-7684
UTF57322.1	aspartate aminotransferase family protein	Staphylococcus epidermidis	TMDU-190	GCA_024204765.1
UTF72465.1	aspartate aminotransferase family protein	Staphylococcus epidermidis	TMDU-2014-62	GCA_024204865.1
UTF63244.1	aspartate aminotransferase family protein	Staphylococcus epidermidis	TMDU-265	GCA_024204785.1
WP_012087795.1	aspartate aminotransferase family protein	Staphylococcus epidermidis	TMDU-300	GCF_024204805.1
UTF67846.1	aspartate aminotransferase family protein	Staphylococcus epidermidis	TMDU-302	GCF_024204825.1
UTF86417.1	aspartate aminotransferase family protein	Staphylococcus epidermidis	TSM-51	GCA_024204985.1
MDK7903855.1	aspartate aminotransferase family protein	Staphylococcus epidermidis	UMB0894	GCA_030225195.1
KAA9318495.1	aspartate aminotransferase family protein	Staphylococcus epidermidis	UMB593	GCA_008727015.1
KAA9309817.1	aspartate aminotransferase family protein	Staphylococcus epidermidis	UMB626	GCA_008726905.1
MDK8781271.1	aspartate aminotransferase family protein	Staphylococcus epidermidis	UMB7933	GCA_030234055.1
WP_032603195.1	aspartate aminotransferase family protein	Staphylococcus epidermidis	USHLN226	GCF_037144765.1
QXU93803.1	aspartate aminotransferase family protein	Staphylococcus epidermidis	V1933625	GCA_019330125.1
QXU91266.1	aspartate aminotransferase family protein	Staphylococcus epidermidis	V1933793	GCA_019330145.1
QXU88795.1	aspartate aminotransferase family protein	Staphylococcus epidermidis	V1936703	GCA_019330165.1
QXU86338.1	aspartate aminotransferase family protein	Staphylococcus epidermidis	V1937538	GCA_019330185.1
QXU81483.1	aspartate aminotransferase family protein	Staphylococcus epidermidis	V1939586	GCA_019330205.1
QXU81244.1	aspartate aminotransferase family protein	Staphylococcus epidermidis	V1949610	GCA_019330225.1
QXU78831.1	aspartate aminotransferase family protein	Staphylococcus epidermidis	V1950266	GCA_019330245.1
WP_002498810.1	aspartate aminotransferase family protein	Staphylococcus epidermidis	VCU014	GCF_000626815.1
EZI13324.1	pyridoxal-dependent decarboxylase domain protein	Staphylococcus epidermidis	VCU050	GCA_000627055.1
KDP68964.1	pyridoxal-dependent decarboxylase domain protein	Staphylococcus epidermidis	VCU111	GCA_000697805.1
WP_012087795.1	aspartate aminotransferase family protein	Staphylococcus epidermidis	VCU120	GCF_000247065.1
WP_002498810.1	aspartate aminotransferase family protein	Staphylococcus epidermidis		GCF_900086615.2
WP_032604866.1	aspartate aminotransferase family protein	Staphylococcus epidermidis		GCF_910590385.1
EON79975.1	hypothetical protein	Staphylococcus epidermidis	41tr	GCA_000390365.1
EON79985.1	hypothetical protein	Staphylococcus epidermidis	528m	GCA_000390345.1
WP_032602160.1	aspartate aminotransferase family protein	Staphylococcus epidermidis	AG42	GCF_000703025.1
EJE32513.1	hypothetical protein	Staphylococcus epidermidis	NIH04008	GCA_000276085.1
EJE28414.1	hypothetical protein	Staphylococcus epidermidis	NIH05001	GCA_000276105.1
EJD97427.1	hypothetical protein	Staphylococcus epidermidis	NIHLM040	GCA_000276365.1
EJD79942.1	hypothetical protein	Staphylococcus epidermidis	NIHLM088	GCA_000276525.1
WP_002498810.1	aspartate aminotransferase family protein	Staphylococcus epidermidis	VCU013	GCF_000697825.1
EHQ72058.1	pyridoxal-dependent decarboxylase domain protein	Staphylococcus epidermidis	VCU041	GCF_000245635.1
WP_002498810.1	aspartate aminotransferase family protein	Staphylococcus epidermidis	VCU065	GCF_000245675.1
EHR90143.1	pyridoxal-dependent decarboxylase domain protein	Staphylococcus epidermidis	VCU125	GCA_000247125.2
WP_002498810.1	aspartate aminotransferase family protein	Staphylococcus epidermidis ATCC 12228	DE0527	GCF_007666585.1
MCH4507634.1	aspartate aminotransferase family protein	Staphylococcus haemolyticus	014P2FS002	GCA_022487665.1
MCH4479511.1	aspartate aminotransferase family protein	Staphylococcus haemolyticus	029P2FS1	GCA_022486345.1
MCH4411398.1	aspartate aminotransferase family protein	Staphylococcus haemolyticus	092P2FS1	GCA_022484885.1
MCH4497899.1	aspartate aminotransferase family protein	Staphylococcus haemolyticus	37P7SUA1	GCA_022487815.1
MBK3949362.1	aspartate aminotransferase family protein	Staphylococcus haemolyticus	AA48	GCA_016621215.1
MCI2935196.1	aspartate aminotransferase family protein	Staphylococcus haemolyticus	acroh	GCF_022690445.1
MCE4960071.1	aspartate aminotransferase family protein	Staphylococcus haemolyticus	Ani-LG-047	GCA_021366955.1
MCH4465305.1	aspartate aminotransferase family protein	Staphylococcus haemolyticus	C37FS2	GCA_022485145.1
MCH4455970.1	aspartate aminotransferase family protein	Staphylococcus haemolyticus	C57FS1	GCA_022486225.1
MCH4364042.1	aspartate aminotransferase family protein	Staphylococcus haemolyticus	C74FS1	GCA_022485245.1
MCH4418713.1	aspartate aminotransferase family protein	Staphylococcus haemolyticus	C89FS3	GCA_022485465.1
WP_002498810.1	aspartate aminotransferase family protein	Staphylococcus haemolyticus	F0_34	GCF_001235105.1
PNN29471.1	aminotransferase class V-fold PLP-dependent enzyme	Staphylococcus haemolyticus	FDAARGOS_148	GCA_001471285.2
WP_240565710.1	aspartate aminotransferase family protein	Staphylococcus haemolyticus	FFTB-27482	GCF_964210995.1
WP_002498810.1	aspartate aminotransferase family protein	Staphylococcus haemolyticus	VB840	GCF_003596385.1
WP_032605060.1	aspartate aminotransferase family protein	Staphylococcus haemolyticus	W59	GCF_001228845.1
BAE03378.1	unnamed protein product	Staphylococcus haemolyticus	JCSC1435	GCA_000009865.1
WP_002498810.1	aspartate aminotransferase family protein	Staphylococcus hominis	1288_SEPI	GCF_001069485.1
MCI2871122.1	aspartate aminotransferase family protein	Staphylococcus hominis	acrlw	GCA_022689885.1
MCI2875369.1	aspartate aminotransferase family protein	Staphylococcus hominis	acrma	GCA_022689925.1
WP_002498810.1	aspartate aminotransferase family protein	Staphylococcus hominis	DE0425	GCF_007672435.1
WP_002498810.1	aspartate aminotransferase family protein	Staphylococcus hominis	JONWP118	GCF_037695095.1
KPG88859.1	pyridoxal-dependent decarboxylase	Staphylococcus hominis	RIT-PI-k	GCA_001297105.1
TRM05964.1	aspartate aminotransferase family protein	Staphylococcus hominis	SDD3	GCA_007004605.1
MDS3885572.1	aspartate aminotransferase family protein	Staphylococcus hominis	SHNIH041	GCA_031728515.1
WP_054105702.1	aspartate aminotransferase family protein	Staphylococcus hominis	TM114-05	GCF_027689395.1
WP_054105702.1	aspartate aminotransferase family protein	Staphylococcus hominis	TM114-127	GCF_027689245.1
WP_054105702.1	aspartate aminotransferase family protein	Staphylococcus hominis	TM114-128	GCF_027689675.1
WP_054105702.1	aspartate aminotransferase family protein	Staphylococcus hominis	TM114-130	GCF_027689215.1
MDK7930091.1	aspartate aminotransferase family protein	Staphylococcus hominis	UMB1176	GCA_030225055.1
UQA65786.1	aspartate aminotransferase family protein	Staphylococcus hominis subsp. hominis	WiKim0113	GCA_023277465.1
PCF64088.1	pyridoxal-dependent decarboxylase	Staphylococcus intermedius	14S02204-1	GCA_002369755.1
PCF78804.1	pyridoxal-dependent decarboxylase	Staphylococcus intermedius	14S03297-1	GCA_002374195.1
PCF79776.1	pyridoxal-dependent decarboxylase	Staphylococcus intermedius	14S03299-1	GCA_002374205.1
PCF89565.1	pyridoxal-dependent decarboxylase	Staphylococcus intermedius	14S03307-1	GCA_002374235.1
SUM45602.1	pyridoxal-dependent decarboxylase domain-containing protein	Staphylococcus intermedius	NCTC 11048	GCA_900458545.1
WP_049386152.1	aspartate aminotransferase family protein	Staphylococcus lugdunensis	RMLUG4	GCF_026427495.1
MDU3709123.1	aspartate aminotransferase family protein	Staphylococcus lugdunensis		GCA_032506615.1
ARJ50788.1	pyridoxal-dependent decarboxylase	Staphylococcus lutrae	ATCC 700373	GCA_002101335.1
TGE14952.1	aminotransferase class V-fold PLP-dependent enzyme	Staphylococcus petrasii	P5404	GCF_004745935.1
SNU95601.1	pyridoxal-deC	Staphylococcus piscifermentans	NCTC13836	GCA_900186985.1
GGG93612.1	pyridoxal-dependent decarboxylase	Staphylococcus pragensis	CCM 8529	GCA_014635505.1
MCE5839266.1	aminotransferase class V-fold PLP-dependent enzyme	Staphylococcus pseudintermedius	1	GCA_021377975.1
MCE5833154.1	aminotransferase class V-fold PLP-dependent enzyme	Staphylococcus pseudintermedius	2	GCA_021377995.1
MCE5830708.1	aminotransferase class V-fold PLP-dependent enzyme	Staphylococcus pseudintermedius	3	GCA_021378005.1
MCE5835142.1	aminotransferase class V-fold PLP-dependent enzyme	Staphylococcus pseudintermedius	4	GCA_021377955.1
MCE5837178.1	aminotransferase class V-fold PLP-dependent enzyme	Staphylococcus pseudintermedius	5	GCA_021377935.1
MCE5826080.1	aminotransferase class V-fold PLP-dependent enzyme	Staphylococcus pseudintermedius	6	GCA_021377915.1
MCE5828697.1	aminotransferase class V-fold PLP-dependent enzyme	Staphylococcus pseudintermedius	7	GCA_021377875.1
MCE5823868.1	aminotransferase class V-fold PLP-dependent enzyme	Staphylococcus pseudintermedius	8	GCA_021377895.1
MCE5818986.1	aminotransferase class V-fold PLP-dependent enzyme	Staphylococcus pseudintermedius	9	GCA_021377855.1
MCE5816436.1	aminotransferase class V-fold PLP-dependent enzyme	Staphylococcus pseudintermedius	12	GCA_021377835.1
MCE5820540.1	aminotransferase class V-fold PLP-dependent enzyme	Staphylococcus pseudintermedius	13	GCA_021377815.1
MCE5809296.1	aminotransferase class V-fold PLP-dependent enzyme	Staphylococcus pseudintermedius	14	GCA_021377785.1
MCE5806113.1	aminotransferase class V-fold PLP-dependent enzyme	Staphylococcus pseudintermedius	16	GCA_021377775.1
MCE5814789.1	aminotransferase class V-fold PLP-dependent enzyme	Staphylococcus pseudintermedius	17	GCA_021377735.1
MCE5811327.1	aminotransferase class V-fold PLP-dependent enzyme	Staphylococcus pseudintermedius	20	GCA_021377755.1
MCE5803633.1	aminotransferase class V-fold PLP-dependent enzyme	Staphylococcus pseudintermedius	22	GCA_021377695.1
MCE5800348.1	aminotransferase class V-fold PLP-dependent enzyme	Staphylococcus pseudintermedius	26	GCA_021377715.1
MCE5801247.1	aminotransferase class V-fold PLP-dependent enzyme	Staphylococcus pseudintermedius	27	GCA_021377665.1
MCE5791839.1	aminotransferase class V-fold PLP-dependent enzyme	Staphylococcus pseudintermedius	28	GCA_021377635.1
MCE5797489.1	aminotransferase class V-fold PLP-dependent enzyme	Staphylococcus pseudintermedius	29	GCA_021377655.1
MCE5789610.1	aminotransferase class V-fold PLP-dependent enzyme	Staphylococcus pseudintermedius	31	GCA_021377595.1
MCE5794586.1	aminotransferase class V-fold PLP-dependent enzyme	Staphylococcus pseudintermedius	32	GCA_021377545.1
MCE5785469.1	aminotransferase class V-fold PLP-dependent enzyme	Staphylococcus pseudintermedius	35	GCA_021377605.1
MCE5783638.1	aminotransferase class V-fold PLP-dependent enzyme	Staphylococcus pseudintermedius	38	GCA_021377535.1
MCE5787476.1	aminotransferase class V-fold PLP-dependent enzyme	Staphylococcus pseudintermedius	40	GCA_021377575.1
MCE5778501.1	aminotransferase class V-fold PLP-dependent enzyme	Staphylococcus pseudintermedius	41	GCA_021377435.1
MCE5770049.1	aminotransferase class V-fold PLP-dependent enzyme	Staphylococcus pseudintermedius	46	GCA_021377475.1
MCE5765440.1	aminotransferase class V-fold PLP-dependent enzyme	Staphylococcus pseudintermedius	53	GCA_021377455.1
MCE5762817.1	aminotransferase class V-fold PLP-dependent enzyme	Staphylococcus pseudintermedius	55	GCA_021377515.1
MCE5758405.1	aminotransferase class V-fold PLP-dependent enzyme	Staphylococcus pseudintermedius	57	GCA_021377445.1
MCE5760768.1	aminotransferase class V-fold PLP-dependent enzyme	Staphylococcus pseudintermedius	58	GCA_021377415.1
MCE5767866.1	aminotransferase class V-fold PLP-dependent enzyme	Staphylococcus pseudintermedius	61	GCA_021377365.1
MCE5775402.1	aminotransferase class V-fold PLP-dependent enzyme	Staphylococcus pseudintermedius	63	GCA_021377355.1
MCE5780377.1	aminotransferase class V-fold PLP-dependent enzyme	Staphylococcus pseudintermedius	73	GCA_021377385.1
MDU0357497.1	aminotransferase class V-fold PLP-dependent enzyme	Staphylococcus pseudintermedius	74	GCA_032464555.1
MCE5772718.1	aminotransferase class V-fold PLP-dependent enzyme	Staphylococcus pseudintermedius	76	GCA_021377335.1
MCE5752921.1	aminotransferase class V-fold PLP-dependent enzyme	Staphylococcus pseudintermedius	77	GCA_021377315.1
MCE5754945.1	aminotransferase class V-fold PLP-dependent enzyme	Staphylococcus pseudintermedius	78	GCA_021377295.1
MCE5752187.1	aminotransferase class V-fold PLP-dependent enzyme	Staphylococcus pseudintermedius	83	GCA_021377275.1
MCE5746342.1	aminotransferase class V-fold PLP-dependent enzyme	Staphylococcus pseudintermedius	84	GCA_021377255.1
MCE5743110.1	aminotransferase class V-fold PLP-dependent enzyme	Staphylococcus pseudintermedius	85	GCA_021377235.1
MCE5748128.1	aminotransferase class V-fold PLP-dependent enzyme	Staphylococcus pseudintermedius	86	GCA_021377215.1
MCE5739888.1	aminotransferase class V-fold PLP-dependent enzyme	Staphylococcus pseudintermedius	90	GCA_021377145.1
MCE5740726.1	aminotransferase class V-fold PLP-dependent enzyme	Staphylococcus pseudintermedius	92	GCA_021377195.1
MCE5736642.1	aminotransferase class V-fold PLP-dependent enzyme	Staphylococcus pseudintermedius	94	GCA_021377115.1
MCE5734131.1	aminotransferase class V-fold PLP-dependent enzyme	Staphylococcus pseudintermedius	96	GCA_021377125.1
MCE5725917.1	aminotransferase class V-fold PLP-dependent enzyme	Staphylococcus pseudintermedius	98	GCA_021377135.1
MCE5722205.1	aminotransferase class V-fold PLP-dependent enzyme	Staphylococcus pseudintermedius	99	GCA_021377035.1
MCE5720017.1	aminotransferase class V-fold PLP-dependent enzyme	Staphylococcus pseudintermedius	100	GCA_021377015.1
MCE5732188.1	aminotransferase class V-fold PLP-dependent enzyme	Staphylococcus pseudintermedius	102	GCA_021377075.1
MCE5729174.1	aminotransferase class V-fold PLP-dependent enzyme	Staphylococcus pseudintermedius	107	GCA_021377045.1
MCE5724118.1	aminotransferase class V-fold PLP-dependent enzyme	Staphylococcus pseudintermedius	114	GCA_021376935.1
MCE5715509.1	aminotransferase class V-fold PLP-dependent enzyme	Staphylococcus pseudintermedius	117	GCA_021376955.1
MCE5716856.1	aminotransferase class V-fold PLP-dependent enzyme	Staphylococcus pseudintermedius	127	GCA_021376945.1
MCE5709992.1	aminotransferase class V-fold PLP-dependent enzyme	Staphylococcus pseudintermedius	131	GCA_021377095.1
MCE5713039.1	aminotransferase class V-fold PLP-dependent enzyme	Staphylococcus pseudintermedius	133	GCA_021376965.1
MCE5705445.1	aminotransferase class V-fold PLP-dependent enzyme	Staphylococcus pseudintermedius	137	GCA_021376895.1
MCE5707341.1	aminotransferase class V-fold PLP-dependent enzyme	Staphylococcus pseudintermedius	139	GCA_021376915.1
MCE5700663.1	aminotransferase class V-fold PLP-dependent enzyme	Staphylococcus pseudintermedius	140	GCA_021376835.1
MCE5695602.1	aminotransferase class V-fold PLP-dependent enzyme	Staphylococcus pseudintermedius	141	GCA_021376865.1
MCE5702379.1	aminotransferase class V-fold PLP-dependent enzyme	Staphylococcus pseudintermedius	143	GCA_021376855.1
MCE5697084.1	aminotransferase class V-fold PLP-dependent enzyme	Staphylococcus pseudintermedius	144	GCA_021376815.1
MCE5685520.1	aminotransferase class V-fold PLP-dependent enzyme	Staphylococcus pseudintermedius	146	GCA_021376795.1
MCE5688158.1	aminotransferase class V-fold PLP-dependent enzyme	Staphylococcus pseudintermedius	148	GCA_021376745.1
MCE5692649.1	aminotransferase class V-fold PLP-dependent enzyme	Staphylococcus pseudintermedius	149	GCA_021376775.1
MCE5689920.1	aminotransferase class V-fold PLP-dependent enzyme	Staphylococcus pseudintermedius	152	GCA_021376735.1
MCE5678077.1	aminotransferase class V-fold PLP-dependent enzyme	Staphylococcus pseudintermedius	154	GCA_021375675.1
MCE5680502.1	aminotransferase class V-fold PLP-dependent enzyme	Staphylococcus pseudintermedius	155	GCA_021375655.1
MCE5671537.1	aminotransferase class V-fold PLP-dependent enzyme	Staphylococcus pseudintermedius	157	GCA_021376705.1
MCE5683304.1	aminotransferase class V-fold PLP-dependent enzyme	Staphylococcus pseudintermedius	158	GCA_021376695.1
MCE5675202.1	aminotransferase class V-fold PLP-dependent enzyme	Staphylococcus pseudintermedius	159	GCA_021376655.1
MCE5664925.1	aminotransferase class V-fold PLP-dependent enzyme	Staphylococcus pseudintermedius	160	GCA_021375625.1
MCE5668735.1	aminotransferase class V-fold PLP-dependent enzyme	Staphylococcus pseudintermedius	163	GCA_021376665.1
MCE5666453.1	aminotransferase class V-fold PLP-dependent enzyme	Staphylococcus pseudintermedius	168	GCA_021375615.1
MCE5673616.1	aminotransferase class V-fold PLP-dependent enzyme	Staphylococcus pseudintermedius	170	GCA_021375595.1
MCE5661208.1	aminotransferase class V-fold PLP-dependent enzyme	Staphylococcus pseudintermedius	178	GCA_021375555.1
MCE5651938.1	aminotransferase class V-fold PLP-dependent enzyme	Staphylococcus pseudintermedius	181	GCA_021375575.1
MCE5658940.1	aminotransferase class V-fold PLP-dependent enzyme	Staphylococcus pseudintermedius	183	GCA_021375535.1
MCE5649710.1	aminotransferase class V-fold PLP-dependent enzyme	Staphylococcus pseudintermedius	188	GCA_021375475.1
MCE5654372.1	aminotransferase class V-fold PLP-dependent enzyme	Staphylococcus pseudintermedius	190	GCA_021375515.1
MCE5647256.1	aminotransferase class V-fold PLP-dependent enzyme	Staphylococcus pseudintermedius	195	GCA_021375495.1
POY85594.1	pyridoxal-dependent decarboxylase	Staphylococcus pseudintermedius	200	GCA_002922575.1
MCE5657150.1	aminotransferase class V-fold PLP-dependent enzyme	Staphylococcus pseudintermedius	201	GCA_021375435.1
MCE5644118.1	aminotransferase class V-fold PLP-dependent enzyme	Staphylococcus pseudintermedius	203	GCA_021375455.1
MCE5642033.1	aminotransferase class V-fold PLP-dependent enzyme	Staphylococcus pseudintermedius	204	GCA_021375415.1
MCE5636943.1	aminotransferase class V-fold PLP-dependent enzyme	Staphylococcus pseudintermedius	205	GCA_021375375.1
MCE5639874.1	aminotransferase class V-fold PLP-dependent enzyme	Staphylococcus pseudintermedius	206	GCA_021375395.1
MCE5633036.1	aminotransferase class V-fold PLP-dependent enzyme	Staphylococcus pseudintermedius	207	GCA_021375335.1
MCE5635218.1	aminotransferase class V-fold PLP-dependent enzyme	Staphylococcus pseudintermedius	210	GCA_021375355.1
MCE5630176.1	aminotransferase class V-fold PLP-dependent enzyme	Staphylococcus pseudintermedius	211	GCA_021375275.1
MCE5628314.1	aminotransferase class V-fold PLP-dependent enzyme	Staphylococcus pseudintermedius	215	GCA_021375295.1
MCE5625699.1	aminotransferase class V-fold PLP-dependent enzyme	Staphylococcus pseudintermedius	216	GCA_021375315.1
MCE5620586.1	aminotransferase class V-fold PLP-dependent enzyme	Staphylococcus pseudintermedius	217	GCA_021375245.1
MCE5624261.1	aminotransferase class V-fold PLP-dependent enzyme	Staphylococcus pseudintermedius	218	GCA_021375185.1
MCE5618951.1	aminotransferase class V-fold PLP-dependent enzyme	Staphylococcus pseudintermedius	220	GCA_021375195.1
MCE5613286.1	aminotransferase class V-fold PLP-dependent enzyme	Staphylococcus pseudintermedius	221	GCA_021375235.1
MCA4773597.1	aminotransferase class V-fold PLP-dependent enzyme	Staphylococcus pseudintermedius	222	GCA_020277465.2
MCE5615968.1	aminotransferase class V-fold PLP-dependent enzyme	Staphylococcus pseudintermedius	223	GCA_021375175.1
MCE5605618.1	aminotransferase class V-fold PLP-dependent enzyme	Staphylococcus pseudintermedius	225	GCA_021375095.1
MCE5610636.1	aminotransferase class V-fold PLP-dependent enzyme	Staphylococcus pseudintermedius	226	GCA_021375155.1
MCE5607869.1	aminotransferase class V-fold PLP-dependent enzyme	Staphylococcus pseudintermedius	227	GCA_021375125.1
MCE5603368.1	aminotransferase class V-fold PLP-dependent enzyme	Staphylococcus pseudintermedius	228	GCA_021375105.1
MCE5601712.1	aminotransferase class V-fold PLP-dependent enzyme	Staphylococcus pseudintermedius	230	GCA_021375075.1
MCE5598844.1	aminotransferase class V-fold PLP-dependent enzyme	Staphylococcus pseudintermedius	231	GCA_021374995.1
MCE5595984.1	aminotransferase class V-fold PLP-dependent enzyme	Staphylococcus pseudintermedius	232	GCA_021375055.1
MCE5590953.1	aminotransferase class V-fold PLP-dependent enzyme	Staphylococcus pseudintermedius	234	GCA_021374975.1
MCE5588776.1	aminotransferase class V-fold PLP-dependent enzyme	Staphylococcus pseudintermedius	235	GCA_021375025.1
MCE5594961.1	aminotransferase class V-fold PLP-dependent enzyme	Staphylococcus pseudintermedius	236	GCA_021375015.1
MCE5586198.1	aminotransferase class V-fold PLP-dependent enzyme	Staphylococcus pseudintermedius	239	GCA_021374935.1
MCE5581445.1	aminotransferase class V-fold PLP-dependent enzyme	Staphylococcus pseudintermedius	241	GCA_021374875.1
MCE5575289.1	aminotransferase class V-fold PLP-dependent enzyme	Staphylococcus pseudintermedius	243	GCA_021374955.1
MCE5583745.1	aminotransferase class V-fold PLP-dependent enzyme	Staphylococcus pseudintermedius	244	GCA_021374895.1
MCE5567999.1	aminotransferase class V-fold PLP-dependent enzyme	Staphylococcus pseudintermedius	248	GCA_021374905.1
MCE5576755.1	aminotransferase class V-fold PLP-dependent enzyme	Staphylococcus pseudintermedius	250	GCA_021374855.1
MCE5569137.1	aminotransferase class V-fold PLP-dependent enzyme	Staphylococcus pseudintermedius	251	GCA_021374835.1
MCE5564492.1	aminotransferase class V-fold PLP-dependent enzyme	Staphylococcus pseudintermedius	252	GCA_021374775.1
MCE5578623.1	aminotransferase class V-fold PLP-dependent enzyme	Staphylococcus pseudintermedius	253	GCA_021374785.1
MCE5571324.1	aminotransferase class V-fold PLP-dependent enzyme	Staphylococcus pseudintermedius	254	GCA_021374795.1
MCE5552089.1	aminotransferase class V-fold PLP-dependent enzyme	Staphylococcus pseudintermedius	255	GCA_021374755.1
MCE5556375.1	aminotransferase class V-fold PLP-dependent enzyme	Staphylococcus pseudintermedius	258	GCA_021374735.1
MCE5554983.1	aminotransferase class V-fold PLP-dependent enzyme	Staphylococcus pseudintermedius	259	GCA_021374685.1
MCE5560155.1	aminotransferase class V-fold PLP-dependent enzyme	Staphylococcus pseudintermedius	264	GCA_021374715.1
MCE5562483.1	aminotransferase class V-fold PLP-dependent enzyme	Staphylococcus pseudintermedius	266	GCA_021374675.1
MCE5539949.1	aminotransferase class V-fold PLP-dependent enzyme	Staphylococcus pseudintermedius	271	GCA_021374645.1
MCE5547848.1	aminotransferase class V-fold PLP-dependent enzyme	Staphylococcus pseudintermedius	272	GCA_021374635.1
MCE5550283.1	aminotransferase class V-fold PLP-dependent enzyme	Staphylococcus pseudintermedius	277	GCA_021374615.1
MCE5543191.1	aminotransferase class V-fold PLP-dependent enzyme	Staphylococcus pseudintermedius	278	GCA_021374595.1
MCE5545627.1	aminotransferase class V-fold PLP-dependent enzyme	Staphylococcus pseudintermedius	279	GCA_021374575.1
MCE5536412.1	aminotransferase class V-fold PLP-dependent enzyme	Staphylococcus pseudintermedius	280	GCA_021374535.1
MCE5537855.1	aminotransferase class V-fold PLP-dependent enzyme	Staphylococcus pseudintermedius	282	GCA_021374555.1
MCE5531078.1	aminotransferase class V-fold PLP-dependent enzyme	Staphylococcus pseudintermedius	284	GCA_021374515.1
MCE5533152.1	aminotransferase class V-fold PLP-dependent enzyme	Staphylococcus pseudintermedius	285	GCA_021374495.1
MCE5524470.1	aminotransferase class V-fold PLP-dependent enzyme	Staphylococcus pseudintermedius	286	GCA_021374475.1
MCE5525578.1	aminotransferase class V-fold PLP-dependent enzyme	Staphylococcus pseudintermedius	287	GCA_021374435.1
MCE5527408.1	aminotransferase class V-fold PLP-dependent enzyme	Staphylococcus pseudintermedius	288	GCA_021374415.1
MCE5516535.1	aminotransferase class V-fold PLP-dependent enzyme	Staphylococcus pseudintermedius	289	GCA_021374365.1
MCE5520984.1	aminotransferase class V-fold PLP-dependent enzyme	Staphylococcus pseudintermedius	290	GCA_021374395.1
MCE5519091.1	aminotransferase class V-fold PLP-dependent enzyme	Staphylococcus pseudintermedius	291	GCA_021374335.1
MCE5508408.1	aminotransferase class V-fold PLP-dependent enzyme	Staphylococcus pseudintermedius	292	GCA_021374355.1
MCE5514492.1	aminotransferase class V-fold PLP-dependent enzyme	Staphylococcus pseudintermedius	295	GCA_021374455.1
MCE5504605.1	aminotransferase class V-fold PLP-dependent enzyme	Staphylococcus pseudintermedius	303	GCA_021374315.1
MCE5510596.1	aminotransferase class V-fold PLP-dependent enzyme	Staphylococcus pseudintermedius	304	GCA_021374295.1
MCE5499049.1	aminotransferase class V-fold PLP-dependent enzyme	Staphylococcus pseudintermedius	306	GCA_021374275.1
MCE5506033.1	aminotransferase class V-fold PLP-dependent enzyme	Staphylococcus pseudintermedius	307	GCA_021374255.1
MCE5502953.1	aminotransferase class V-fold PLP-dependent enzyme	Staphylococcus pseudintermedius	308	GCA_021374235.1
MCE5497412.1	aminotransferase class V-fold PLP-dependent enzyme	Staphylococcus pseudintermedius	309	GCA_021374175.1
MCE5492146.1	aminotransferase class V-fold PLP-dependent enzyme	Staphylococcus pseudintermedius	310	GCA_021374215.1
MCE5494992.1	aminotransferase class V-fold PLP-dependent enzyme	Staphylococcus pseudintermedius	311	GCA_021374165.1
MCE5486963.1	aminotransferase class V-fold PLP-dependent enzyme	Staphylococcus pseudintermedius	313	GCA_021374155.1
MCE5489177.1	aminotransferase class V-fold PLP-dependent enzyme	Staphylococcus pseudintermedius	314	GCA_021374135.1
MCE5482219.1	aminotransferase class V-fold PLP-dependent enzyme	Staphylococcus pseudintermedius	315	GCA_021374075.1
MCE5484581.1	aminotransferase class V-fold PLP-dependent enzyme	Staphylococcus pseudintermedius	316	GCA_021374115.1
MCE5479886.1	aminotransferase class V-fold PLP-dependent enzyme	Staphylococcus pseudintermedius	317	GCA_021374085.1
MCE5475676.1	aminotransferase class V-fold PLP-dependent enzyme	Staphylococcus pseudintermedius	318	GCA_021374055.1
MCE5478390.1	aminotransferase class V-fold PLP-dependent enzyme	Staphylococcus pseudintermedius	320	GCA_021374035.1
MCE5471400.1	aminotransferase class V-fold PLP-dependent enzyme	Staphylococcus pseudintermedius	321	GCA_021374015.1
MCE5473814.1	aminotransferase class V-fold PLP-dependent enzyme	Staphylococcus pseudintermedius	326	GCA_021373995.1
MCE5468571.1	aminotransferase class V-fold PLP-dependent enzyme	Staphylococcus pseudintermedius	329	GCA_021373975.1
MCE5460821.1	aminotransferase class V-fold PLP-dependent enzyme	Staphylococcus pseudintermedius	330	GCA_021373955.1
MCE5453298.1	aminotransferase class V-fold PLP-dependent enzyme	Staphylococcus pseudintermedius	333	GCA_021373895.1
POY83773.1	pyridoxal-dependent decarboxylase	Staphylococcus pseudintermedius	335	GCA_002922565.1
MCE5466682.1	aminotransferase class V-fold PLP-dependent enzyme	Staphylococcus pseudintermedius	337	GCA_021373935.1
MCE5456059.1	aminotransferase class V-fold PLP-dependent enzyme	Staphylococcus pseudintermedius	340	GCA_021373905.1
MCE5464192.1	aminotransferase class V-fold PLP-dependent enzyme	Staphylococcus pseudintermedius	341	GCA_021373855.1
MCE5450848.1	aminotransferase class V-fold PLP-dependent enzyme	Staphylococcus pseudintermedius	348	GCA_021373865.1
MCE5445101.1	aminotransferase class V-fold PLP-dependent enzyme	Staphylococcus pseudintermedius	354	GCA_021373815.1
MCE5447232.1	aminotransferase class V-fold PLP-dependent enzyme	Staphylococcus pseudintermedius	355	GCA_021373835.1
MCE5449989.1	aminotransferase class V-fold PLP-dependent enzyme	Staphylococcus pseudintermedius	357	GCA_021373775.1
MCE5458533.1	aminotransferase class V-fold PLP-dependent enzyme	Staphylococcus pseudintermedius	360	GCA_021373755.1
MCE5434150.1	aminotransferase class V-fold PLP-dependent enzyme	Staphylococcus pseudintermedius	362	GCA_021373795.1
MCE5429736.1	aminotransferase class V-fold PLP-dependent enzyme	Staphylococcus pseudintermedius	364	GCA_021373735.1
MCE5437453.1	aminotransferase class V-fold PLP-dependent enzyme	Staphylococcus pseudintermedius	366	GCA_021373715.1
MCE5409652.1	aminotransferase class V-fold PLP-dependent enzyme	Staphylococcus pseudintermedius	367	GCA_021373695.1
MCE5441371.1	aminotransferase class V-fold PLP-dependent enzyme	Staphylococcus pseudintermedius	368	GCA_021373655.1
MCE5411952.1	aminotransferase class V-fold PLP-dependent enzyme	Staphylococcus pseudintermedius	371	GCA_021373635.1
MCE5431799.1	aminotransferase class V-fold PLP-dependent enzyme	Staphylococcus pseudintermedius	372	GCA_021373665.1
MCE5414568.1	aminotransferase class V-fold PLP-dependent enzyme	Staphylococcus pseudintermedius	374	GCA_021373615.1
MCE5439698.1	aminotransferase class V-fold PLP-dependent enzyme	Staphylococcus pseudintermedius	381	GCA_021373595.1
MCE5427949.1	aminotransferase class V-fold PLP-dependent enzyme	Staphylococcus pseudintermedius	384	GCA_021373555.1
MCE5357657.1	aminotransferase class V-fold PLP-dependent enzyme	Staphylococcus pseudintermedius	385	GCA_021373545.1
POY89033.1	pyridoxal-dependent decarboxylase	Staphylococcus pseudintermedius	473	GCA_002922545.1
POZ01705.1	pyridoxal-dependent decarboxylase	Staphylococcus pseudintermedius	476	GCA_002922705.1
WMZ84901.1	aminotransferase class V-fold PLP-dependent enzyme	Staphylococcus pseudintermedius	536	GCA_031477395.1
POZ01238.1	pyridoxal-dependent decarboxylase	Staphylococcus pseudintermedius	586	GCA_002922645.1
MRI05090.1	aminotransferase class V-fold PLP-dependent enzyme	Staphylococcus pseudintermedius	625	GCA_009649855.1
POY95294.1	pyridoxal-dependent decarboxylase	Staphylococcus pseudintermedius	651	GCA_002922635.1
POY93586.1	pyridoxal-dependent decarboxylase	Staphylococcus pseudintermedius	684	GCA_002922625.1
POY91012.1	pyridoxal-dependent decarboxylase	Staphylococcus pseudintermedius	738	GCA_002922675.1
POY93715.1	pyridoxal-dependent decarboxylase	Staphylococcus pseudintermedius	742	GCA_002922555.1
ASQ49558.1	pyridoxal-dependent decarboxylase	Staphylococcus pseudintermedius	5912	GCA_002950775.1
QTN12930.1	aminotransferase class V-fold PLP-dependent enzyme	Staphylococcus pseudintermedius	6109	GCA_017795485.1
HAR5699665.1	aminotransferase class V-fold PLP-dependent enzyme	Staphylococcus pseudintermedius	32959	GCA_015583635.1
HAR5676492.1	aminotransferase class V-fold PLP-dependent enzyme	Staphylococcus pseudintermedius	32980	GCA_015583735.1
HAR5684670.1	aminotransferase class V-fold PLP-dependent enzyme	Staphylococcus pseudintermedius	33587	GCA_015583775.1
HAR5666294.1	aminotransferase class V-fold PLP-dependent enzyme	Staphylococcus pseudintermedius	35681	GCA_015583655.1
HAR5678968.1	aminotransferase class V-fold PLP-dependent enzyme	Staphylococcus pseudintermedius	35686	GCA_015583715.1
HAR5697742.1	aminotransferase class V-fold PLP-dependent enzyme	Staphylococcus pseudintermedius	41415	GCA_015583835.1
HAR5738062.1	aminotransferase class V-fold PLP-dependent enzyme	Staphylococcus pseudintermedius	41989	GCA_015584435.1
HAR5689294.1	aminotransferase class V-fold PLP-dependent enzyme	Staphylococcus pseudintermedius	42001	GCA_015583595.1
HAR5707535.1	aminotransferase class V-fold PLP-dependent enzyme	Staphylococcus pseudintermedius	42203	GCA_015583755.1
HAR5681462.1	aminotransferase class V-fold PLP-dependent enzyme	Staphylococcus pseudintermedius	42749	GCA_015583615.1
HAR5661046.1	aminotransferase class V-fold PLP-dependent enzyme	Staphylococcus pseudintermedius	42779	GCA_015583465.1
HAR5705005.1	aminotransferase class V-fold PLP-dependent enzyme	Staphylococcus pseudintermedius	42780	GCA_015583395.1
HAR5651215.1	aminotransferase class V-fold PLP-dependent enzyme	Staphylococcus pseudintermedius	42843	GCA_015583515.1
HAR5653338.1	aminotransferase class V-fold PLP-dependent enzyme	Staphylococcus pseudintermedius	43000	GCA_015583415.1
HAR5735841.1	aminotransferase class V-fold PLP-dependent enzyme	Staphylococcus pseudintermedius	44194	GCA_015584215.1
HAR5673632.1	aminotransferase class V-fold PLP-dependent enzyme	Staphylococcus pseudintermedius	44212	GCA_015583575.1
HAR5692632.1	aminotransferase class V-fold PLP-dependent enzyme	Staphylococcus pseudintermedius	44395	GCA_015583435.1
HAR5730775.1	aminotransferase class V-fold PLP-dependent enzyme	Staphylococcus pseudintermedius	44396	GCA_015584115.1
HAR5686284.1	aminotransferase class V-fold PLP-dependent enzyme	Staphylococcus pseudintermedius	44407	GCA_015583695.1
HAR5656607.1	aminotransferase class V-fold PLP-dependent enzyme	Staphylococcus pseudintermedius	44440	GCA_015583495.1
HAR5671024.1	aminotransferase class V-fold PLP-dependent enzyme	Staphylococcus pseudintermedius	44666	GCA_015583555.1
HAR5658491.1	aminotransferase class V-fold PLP-dependent enzyme	Staphylococcus pseudintermedius	44812	GCA_015583815.1
MDT1048955.1	aminotransferase class V-fold PLP-dependent enzyme	Staphylococcus pseudintermedius	45505	GCA_031854175.1
MDT1038399.1	aminotransferase class V-fold PLP-dependent enzyme	Staphylococcus pseudintermedius	45568	GCA_031854125.1
MDT1128930.1	aminotransferase class V-fold PLP-dependent enzyme	Staphylococcus pseudintermedius	45573	GCA_031854085.1
MDT1078947.1	aminotransferase class V-fold PLP-dependent enzyme	Staphylococcus pseudintermedius	45597	GCA_031854055.1
MDT1092632.1	aminotransferase class V-fold PLP-dependent enzyme	Staphylococcus pseudintermedius	45599	GCA_031854065.1
HAR5663310.1	aminotransferase class V-fold PLP-dependent enzyme	Staphylococcus pseudintermedius	45665	GCA_015583675.1
ANS88386.1	hypothetical protein	Staphylococcus pseudintermedius	63228	GCA_001685665.2
MBC8680077.1	aminotransferase class V-fold PLP-dependent enzyme	Staphylococcus pseudintermedius	69687	GCA_014397345.1
ANQ87292.1	pyridoxal-dependent decarboxylase	Staphylococcus pseudintermedius	81661	GCA_001682435.2
QOI78173.1	aminotransferase class V-fold PLP-dependent enzyme	Staphylococcus pseudintermedius	157588	GCA_013285265.2
WMV86841.1	aminotransferase class V-fold PLP-dependent enzyme	Staphylococcus pseudintermedius	452964	GCA_031239735.1
MDT1109099.1	aminotransferase class V-fold PLP-dependent enzyme	Staphylococcus pseudintermedius	1319135	GCA_031854135.1
WP_051144715.1	aminotransferase class V-fold PLP-dependent enzyme	Staphylococcus pseudintermedius	2080717047021	GCF_002766935.1
WP_051144715.1	aminotransferase class V-fold PLP-dependent enzyme	Staphylococcus pseudintermedius	2080718044011	GCF_002766945.1
WP_063278665.1	aminotransferase class V-fold PLP-dependent enzyme	Staphylococcus pseudintermedius	2080722072011	GCF_002766955.1
WP_051144715.1	aminotransferase class V-fold PLP-dependent enzyme	Staphylococcus pseudintermedius	2080730018011	GCF_002766965.1
WP_051144715.1	aminotransferase class V-fold PLP-dependent enzyme	Staphylococcus pseudintermedius	2080819050011	GCF_002767115.1
WP_100002752.1	aminotransferase class V-fold PLP-dependent enzyme	Staphylococcus pseudintermedius	2080821017011	GCF_002767065.1
WP_051144715.1	aminotransferase class V-fold PLP-dependent enzyme	Staphylococcus pseudintermedius	2080828038021	GCF_002767135.1
WP_096535997.1	aminotransferase class V-fold PLP-dependent enzyme	Staphylococcus pseudintermedius	2080902050011	GCF_002767055.1
WP_051144715.1	aminotransferase class V-fold PLP-dependent enzyme	Staphylococcus pseudintermedius	2080909031013	GCF_002767145.1
WP_051144715.1	aminotransferase class V-fold PLP-dependent enzyme	Staphylococcus pseudintermedius	2081126023011	GCF_002767125.1
WP_051144715.1	aminotransferase class V-fold PLP-dependent enzyme	Staphylococcus pseudintermedius	2090112027012	GCF_002767355.1
WP_063278665.1	aminotransferase class V-fold PLP-dependent enzyme	Staphylococcus pseudintermedius	2090113009011	GCF_002767365.1
WP_063278665.1	aminotransferase class V-fold PLP-dependent enzyme	Staphylococcus pseudintermedius	2090130020011	GCF_002767245.1
WP_051144715.1	aminotransferase class V-fold PLP-dependent enzyme	Staphylococcus pseudintermedius	2090204014011	GCF_002767375.1
WP_051144715.1	aminotransferase class V-fold PLP-dependent enzyme	Staphylococcus pseudintermedius	2090225035011	GCF_002767295.1
WP_051144715.1	aminotransferase class V-fold PLP-dependent enzyme	Staphylococcus pseudintermedius	2090312016045	GCF_002767475.1
WP_051144715.1	aminotransferase class V-fold PLP-dependent enzyme	Staphylococcus pseudintermedius	2090325008013	GCF_002767485.1
WP_051144715.1	aminotransferase class V-fold PLP-dependent enzyme	Staphylococcus pseudintermedius	2090403026011	GCF_002767445.1
WP_051144715.1	aminotransferase class V-fold PLP-dependent enzyme	Staphylococcus pseudintermedius	2090427021011	GCF_002767495.1
WP_051144715.1	aminotransferase class V-fold PLP-dependent enzyme	Staphylococcus pseudintermedius	2090526044011	GCF_002767575.1
WP_070407347.1	aminotransferase class V-fold PLP-dependent enzyme	Staphylococcus pseudintermedius	2090805038021	GCF_002767625.1
WP_063278665.1	aminotransferase class V-fold PLP-dependent enzyme	Staphylococcus pseudintermedius	2091007021021	GCF_002767605.1
WP_096535997.1	aminotransferase class V-fold PLP-dependent enzyme	Staphylococcus pseudintermedius	2091130024011	GCF_002767615.1
WP_063278665.1	aminotransferase class V-fold PLP-dependent enzyme	Staphylococcus pseudintermedius	2100503050011	GCF_002767695.1
WP_051144715.1	aminotransferase class V-fold PLP-dependent enzyme	Staphylococcus pseudintermedius	2100623016011	GCF_002767705.1
WP_099997499.1	aminotransferase class V-fold PLP-dependent enzyme	Staphylococcus pseudintermedius	2100813039011	GCF_002767795.1
WP_096535997.1	aminotransferase class V-fold PLP-dependent enzyme	Staphylococcus pseudintermedius	2100830037011	GCF_002767805.1
WP_096535997.1	aminotransferase class V-fold PLP-dependent enzyme	Staphylococcus pseudintermedius	2101019023021	GCF_002767815.1
WP_051144715.1	aminotransferase class V-fold PLP-dependent enzyme	Staphylococcus pseudintermedius	2110128023021	GCF_002767885.1
WP_051144715.1	aminotransferase class V-fold PLP-dependent enzyme	Staphylococcus pseudintermedius	2110415058011	GCF_002767925.1
WP_051144715.1	aminotransferase class V-fold PLP-dependent enzyme	Staphylococcus pseudintermedius	2110831019011	GCF_002767915.1
WP_063284834.1	aminotransferase class V-fold PLP-dependent enzyme	Staphylococcus pseudintermedius	2120306040011	GCF_002767945.1
WP_096535997.1	aminotransferase class V-fold PLP-dependent enzyme	Staphylococcus pseudintermedius	2120308024011	GCF_002767985.1
WP_051144715.1	aminotransferase class V-fold PLP-dependent enzyme	Staphylococcus pseudintermedius	2120427031011	GCF_002768035.1
WP_099997499.1	aminotransferase class V-fold PLP-dependent enzyme	Staphylococcus pseudintermedius	2120611027011	GCF_002768095.1
WP_096535997.1	aminotransferase class V-fold PLP-dependent enzyme	Staphylococcus pseudintermedius	2121129020011	GCF_002768045.1
WP_096535997.1	aminotransferase class V-fold PLP-dependent enzyme	Staphylococcus pseudintermedius	2121224012011	GCF_002768105.1
WP_051144715.1	aminotransferase class V-fold PLP-dependent enzyme	Staphylococcus pseudintermedius	2130107014011	GCF_002768205.1
WP_096535997.1	aminotransferase class V-fold PLP-dependent enzyme	Staphylococcus pseudintermedius	2130122024011	GCF_002768215.1
WP_096535997.1	aminotransferase class V-fold PLP-dependent enzyme	Staphylococcus pseudintermedius	2130123015011	GCF_002768155.1
WP_063278665.1	aminotransferase class V-fold PLP-dependent enzyme	Staphylococcus pseudintermedius	2130212060013	GCF_002768225.1
WP_100002752.1	aminotransferase class V-fold PLP-dependent enzyme	Staphylococcus pseudintermedius	2130327043011	GCF_002768275.1
WP_096535997.1	aminotransferase class V-fold PLP-dependent enzyme	Staphylococcus pseudintermedius	2130415031011	GCF_002768335.1
WP_096535997.1	aminotransferase class V-fold PLP-dependent enzyme	Staphylococcus pseudintermedius	2130625023011	GCF_002768345.1
WP_096535997.1	aminotransferase class V-fold PLP-dependent enzyme	Staphylococcus pseudintermedius	2130925043011	GCF_002768355.1
WP_096535997.1	aminotransferase class V-fold PLP-dependent enzyme	Staphylococcus pseudintermedius	2131011034011	GCF_002768365.1
WP_096535997.1	aminotransferase class V-fold PLP-dependent enzyme	Staphylococcus pseudintermedius	2131017012012	GCF_002768435.1
WP_051144715.1	aminotransferase class V-fold PLP-dependent enzyme	Staphylococcus pseudintermedius	2131211036011	GCF_002768475.1
WP_063278665.1	aminotransferase class V-fold PLP-dependent enzyme	Staphylococcus pseudintermedius	2131231043014	GCF_002768455.1
PPD61917.1	aminotransferase class V-fold PLP-dependent enzyme	Staphylococcus pseudintermedius	104N	GCA_002847235.2
WIV27972.1	aminotransferase class V-fold PLP-dependent enzyme	Staphylococcus pseudintermedius	10916-77753	GCA_030263975.1
PPD65167.1	aminotransferase class V-fold PLP-dependent enzyme	Staphylococcus pseudintermedius	111N	GCA_002847225.2
POF46455.1	aminotransferase class V-fold PLP-dependent enzyme	Staphylococcus pseudintermedius	112N	GCA_002847205.2
PKW57395.1	pyridoxal-dependent decarboxylase	Staphylococcus pseudintermedius	113N	GCA_002847165.1
PKW54880.1	pyridoxal-dependent decarboxylase	Staphylococcus pseudintermedius	114N	GCA_002847175.1
PPD59924.1	pyridoxal-dependent decarboxylase	Staphylococcus pseudintermedius	117N	GCA_002847265.2
TYK56587.1	aminotransferase class V-fold PLP-dependent enzyme	Staphylococcus pseudintermedius	13-13613	GCA_008121295.1
MDT1117166.1	aminotransferase class V-fold PLP-dependent enzyme	Staphylococcus pseudintermedius	14-01	GCA_031854045.1
HAR6258452.1	aminotransferase class V-fold PLP-dependent enzyme	Staphylococcus pseudintermedius	14-01038	GCA_015589385.1
MDT1094556.1	aminotransferase class V-fold PLP-dependent enzyme	Staphylococcus pseudintermedius	14-06	GCA_031854025.1
MDT0984087.1	aminotransferase class V-fold PLP-dependent enzyme	Staphylococcus pseudintermedius	14-08	GCA_031854005.1
PCF65891.1	pyridoxal-dependent decarboxylase	Staphylococcus pseudintermedius	14S02793-1	GCA_002369795.1
MDT0981163.1	aminotransferase class V-fold PLP-dependent enzyme	Staphylococcus pseudintermedius	15-01	GCA_031853985.1
MDT0948988.1	aminotransferase class V-fold PLP-dependent enzyme	Staphylococcus pseudintermedius	15-1088	GCA_031853945.1
MDT0986609.1	aminotransferase class V-fold PLP-dependent enzyme	Staphylococcus pseudintermedius	15-3667	GCA_031853965.1
MDT0962090.1	aminotransferase class V-fold PLP-dependent enzyme	Staphylococcus pseudintermedius	15-4050	GCA_031853925.1
MDT0966997.1	aminotransferase class V-fold PLP-dependent enzyme	Staphylococcus pseudintermedius	16-01	GCA_031853905.1
MDT0976532.1	aminotransferase class V-fold PLP-dependent enzyme	Staphylococcus pseudintermedius	16-0338	GCA_031853865.1
MDT0974092.1	aminotransferase class V-fold PLP-dependent enzyme	Staphylococcus pseudintermedius	16-04	GCA_031853845.1
MDT0971187.1	aminotransferase class V-fold PLP-dependent enzyme	Staphylococcus pseudintermedius	16-06	GCA_031853885.1
MDT0969036.1	aminotransferase class V-fold PLP-dependent enzyme	Staphylococcus pseudintermedius	16-3767	GCA_031853825.1
MDT0957074.1	aminotransferase class V-fold PLP-dependent enzyme	Staphylococcus pseudintermedius	16-4535	GCA_031853805.1
MDT0964359.1	aminotransferase class V-fold PLP-dependent enzyme	Staphylococcus pseudintermedius	17-01	GCA_031853765.1
MDT0953947.1	aminotransferase class V-fold PLP-dependent enzyme	Staphylococcus pseudintermedius	17-02	GCA_031853785.1
MDT0951737.1	aminotransferase class V-fold PLP-dependent enzyme	Staphylococcus pseudintermedius	17-07	GCA_031853725.1
MDT0946869.1	aminotransferase class V-fold PLP-dependent enzyme	Staphylococcus pseudintermedius	17-08	GCA_031853705.1
MDT0944762.1	aminotransferase class V-fold PLP-dependent enzyme	Staphylococcus pseudintermedius	17-09	GCA_031853665.1
HBU9601812.1	aminotransferase class V-fold PLP-dependent enzyme	Staphylococcus pseudintermedius	17-123216	GCA_022115795.1
HBU9597882.1	aminotransferase class V-fold PLP-dependent enzyme	Staphylococcus pseudintermedius	17-123218	GCA_022115835.1
MDT0959258.1	aminotransferase class V-fold PLP-dependent enzyme	Staphylococcus pseudintermedius	17-18	GCA_031853625.1
MDT0874544.1	aminotransferase class V-fold PLP-dependent enzyme	Staphylococcus pseudintermedius	17-1948	GCA_031853545.1
MDT0934694.1	aminotransferase class V-fold PLP-dependent enzyme	Staphylococcus pseudintermedius	17-23	GCA_031853585.1
MDT0927565.1	aminotransferase class V-fold PLP-dependent enzyme	Staphylococcus pseudintermedius	17-2370	GCA_031853525.1
MDT0937030.1	aminotransferase class V-fold PLP-dependent enzyme	Staphylococcus pseudintermedius	17-25	GCA_031853565.1
WP_096535997.1	aminotransferase class V-fold PLP-dependent enzyme	Staphylococcus pseudintermedius	17SD1	GCF_036409935.1
WP_096535997.1	aminotransferase class V-fold PLP-dependent enzyme	Staphylococcus pseudintermedius	17T1	GCF_036409945.1
MDT0887799.1	aminotransferase class V-fold PLP-dependent enzyme	Staphylococcus pseudintermedius	18-01	GCA_031853465.1
MDT0924797.1	aminotransferase class V-fold PLP-dependent enzyme	Staphylococcus pseudintermedius	18-05	GCA_031853495.1
MDT0908084.1	aminotransferase class V-fold PLP-dependent enzyme	Staphylococcus pseudintermedius	18-06	GCA_031853485.1
MDT0867761.1	aminotransferase class V-fold PLP-dependent enzyme	Staphylococcus pseudintermedius	18-08	GCA_031853445.1
MDT0897988.1	aminotransferase class V-fold PLP-dependent enzyme	Staphylococcus pseudintermedius	18-11	GCA_031853425.1
MDT0931655.1	aminotransferase class V-fold PLP-dependent enzyme	Staphylococcus pseudintermedius	18-12	GCA_031853405.1
MDT0905877.1	aminotransferase class V-fold PLP-dependent enzyme	Staphylococcus pseudintermedius	18-14	GCA_031853385.1
MDT0909908.1	aminotransferase class V-fold PLP-dependent enzyme	Staphylococcus pseudintermedius	18-4340	GCA_031853305.1
WP_330986415.1	aminotransferase class V-fold PLP-dependent enzyme	Staphylococcus pseudintermedius	18SD1	GCF_036409595.1
MDT0895395.1	aminotransferase class V-fold PLP-dependent enzyme	Staphylococcus pseudintermedius	19-01	GCA_031853345.1
MDT0870528.1	aminotransferase class V-fold PLP-dependent enzyme	Staphylococcus pseudintermedius	19-02	GCA_031853325.1
MDT0893457.1	aminotransferase class V-fold PLP-dependent enzyme	Staphylococcus pseudintermedius	19-03	GCA_031853285.1
MDT0917178.1	aminotransferase class V-fold PLP-dependent enzyme	Staphylococcus pseudintermedius	19-04	GCA_031853265.1
MDT0886167.1	aminotransferase class V-fold PLP-dependent enzyme	Staphylococcus pseudintermedius	19-05	GCA_031853245.1
MDT0929872.1	aminotransferase class V-fold PLP-dependent enzyme	Staphylococcus pseudintermedius	19-07	GCA_031853225.1
MDT0938351.1	aminotransferase class V-fold PLP-dependent enzyme	Staphylococcus pseudintermedius	19-08	GCA_031853185.1
MDT0900919.1	aminotransferase class V-fold PLP-dependent enzyme	Staphylococcus pseudintermedius	19-09	GCA_031853165.1
HBU9604227.1	aminotransferase class V-fold PLP-dependent enzyme	Staphylococcus pseudintermedius	19-150831	GCA_022115875.1
HBU9600088.1	aminotransferase class V-fold PLP-dependent enzyme	Staphylococcus pseudintermedius	19-150832	GCA_022115855.1
MDT0920066.1	aminotransferase class V-fold PLP-dependent enzyme	Staphylococcus pseudintermedius	19-1556	GCA_031853065.1
MDT0915849.1	aminotransferase class V-fold PLP-dependent enzyme	Staphylococcus pseudintermedius	19-1599	GCA_031853085.1
MDT0866241.1	aminotransferase class V-fold PLP-dependent enzyme	Staphylococcus pseudintermedius	19-16	GCA_031853145.1
MDT0890463.1	aminotransferase class V-fold PLP-dependent enzyme	Staphylococcus pseudintermedius	19-17	GCA_031853105.1
MDT0877921.1	aminotransferase class V-fold PLP-dependent enzyme	Staphylococcus pseudintermedius	19-18	GCA_031853125.1
MDT0880379.1	aminotransferase class V-fold PLP-dependent enzyme	Staphylococcus pseudintermedius	19-19	GCA_031853205.1
MDT0882633.1	aminotransferase class V-fold PLP-dependent enzyme	Staphylococcus pseudintermedius	19-2630	GCA_031853045.1
WIR76127.1	aminotransferase class V-fold PLP-dependent enzyme	Staphylococcus pseudintermedius	19KM0990	GCA_030254625.1
WP_063278665.1	aminotransferase class V-fold PLP-dependent enzyme	Staphylococcus pseudintermedius	19SD2	GCF_036409895.1
WP_330986415.1	aminotransferase class V-fold PLP-dependent enzyme	Staphylococcus pseudintermedius	1SD1	GCF_036409715.1
MDT0782131.1	aminotransferase class V-fold PLP-dependent enzyme	Staphylococcus pseudintermedius	20-01	GCA_031852985.1
KZK18641.1	pyridoxal-dependent decarboxylase	Staphylococcus pseudintermedius	2001-08-299-1	GCA_001622945.1
MDT0795179.1	aminotransferase class V-fold PLP-dependent enzyme	Staphylococcus pseudintermedius	20-04	GCA_031852825.1
MDT0779665.1	aminotransferase class V-fold PLP-dependent enzyme	Staphylococcus pseudintermedius	20-05	GCA_031852805.1
MDT0813866.1	aminotransferase class V-fold PLP-dependent enzyme	Staphylococcus pseudintermedius	20-06	GCA_031852785.1
MDT0816418.1	aminotransferase class V-fold PLP-dependent enzyme	Staphylococcus pseudintermedius	20-0654	GCA_031852705.1
MDT0849445.1	aminotransferase class V-fold PLP-dependent enzyme	Staphylococcus pseudintermedius	20-09	GCA_031852745.1
MDT0858605.1	aminotransferase class V-fold PLP-dependent enzyme	Staphylococcus pseudintermedius	20-10	GCA_031852725.1
MDT0873539.1	aminotransferase class V-fold PLP-dependent enzyme	Staphylococcus pseudintermedius	20-12	GCA_031853005.1
MDT0786353.1	aminotransferase class V-fold PLP-dependent enzyme	Staphylococcus pseudintermedius	20-13	GCA_031852945.1
MDT0760351.1	aminotransferase class V-fold PLP-dependent enzyme	Staphylococcus pseudintermedius	20-14	GCA_031852965.1
MDT0835535.1	aminotransferase class V-fold PLP-dependent enzyme	Staphylococcus pseudintermedius	20-15	GCA_031852925.1
MDT0806263.1	aminotransferase class V-fold PLP-dependent enzyme	Staphylococcus pseudintermedius	20-1540	GCA_031852765.1
MDT0856928.1	aminotransferase class V-fold PLP-dependent enzyme	Staphylococcus pseudintermedius	20-17	GCA_031852865.1
[truncated: 3,919 more rows]
